# Supplementary material
Source: publisher figshare collection journal article supplement (https://geolsoc.figshare.com/ndownloader/files/26181416)
Supplement: Supplementary file 1 [file 26181416]

## Sheet: 24 Sinks Neo-Tri REFS
Group	Samples	Reference
I. Cambrian-Devonian Northern BC	Atan	Gehrels and Pecha, 2014
	Monkman	Gehrels and Pecha, 2014
	Wokpash	Gehrels and Pecha, 2014
II. Pennsylvanian-Triassic, BC	Liard (based on similarity to Spray)	Gehrels and Pecha, 2014
	Spray	Gehrels and Pecha, 2014
III. Neoproterozoic-Odrovician southern BC	Horsethief Creek	Gehrels and Pecha, 2014
	Hamill	Gehrels and Pecha, 2014
	Mount Wilson	Gehrels and Pecha, 2014
III. Triassic Southern BC	Whitehorse	Gehrels and Pecha, 2014
IV. Neoproterozoic Nevada-Utah	Caddy	Gehrels and Pecha, 2014
	Mutual	Gehrels and Pecha, 2014
IV. Neoproterozoic-Lower Cambrian Nevada-Utah	Geertsen	Gehrels and Pecha, 2014
	Osgood	Gehrels and Pecha, 2014
IV. Ordovician Nevada-Utah	Eureka	Gehrels and Pecha, 2014
	Valmy	Gehrels and Pecha, 2014
	Upper Vinini Formation	Linde et al., 2016
	McAfee Quartzite	Linde et al., 2016
	Snow Canyon Formation	Linde et al., 2016
IV. Silurian- Devonian Nevada-Utah	II	Gehrels and Pecha, 2014
	Elder Sandstone	Linde et al., 2016
	Slaven Chert	Linde et al., 2016
IV. Carboniferous Nevada-Utah	Battle	Gehrels and Pecha, 2014
	Tonka	Gehrels and Pecha, 2014
IV. Triassic Nevada-Utah	Chinle	Gehrels and Pecha, 2014
	Osobb	Gehrels and Pecha, 2014
V. Harmony A	Little Cottonwood Canyon 1	Linde et al., 2017
	Little Cottonwood Canyon 2	Linde et al., 2017
	Little Cottonwood Canyon 10	Linde et al., 2017
V. Harmony B	Little Cottonwood Canyon 3	Linde et al., 2017
	Little Cottonwood Canyon 4	Linde et al., 2017
	Little Cottonwood Canyon 9	Linde et al., 2017
V. Vinni Formation	Lower Vinini Formation	Linde et al., 2016
	Vinini	Gehrels and Pecha, 2014
VI. Neoproterozoic California (Wood Canyon)	Wood Canyon #1	Gehrels and Pecha, 2014
VI. Meso-Neoproterozoic California	WQ97-1	Wooden et al., 2013
	WQ91-2	Wooden et al., 2013
	JW98-333	Wooden et al., 2013
VI. Neoproterozoic-Lower Cambrian California	Wood Canyon #2	Gehrels and Pecha, 2014
	Zabriski Quartzite	Gehrels and Pecha, 2014
	ZAB	Wooden et al., 2013
	ZBR	Wooden et al., 2013
	WC	Wooden et al., 2013
VII. Lower Cambrian Sonora	Proveedora	Gehrels and Pecha, 2014
VII. Ordovician Sonora	Sierra Lopez	Gehrels and Pecha, 2014
	Sierra El Aliso	Gehrels and Pecha, 2014
VII. Devonian Sonora	Cerro Pollo	Gehrels and Pecha, 2014
	Los Pozos	Gehrels and Pecha, 2014
VII. Permian Sonora	Sierra Santa Teresa	Gehrels and Pecha, 2014
	Mina Mexico	Gehrels and Pecha, 2014
VII. Triassic Sonora	Barranca Group	Gehrels and Pecha, 2014
	Antimonio Formation	Gehrels and Pecha, 2014
VIII. Pennsylvanian midcontinent basins (type 2)	IB-D1	Thomas et al., 2020
	FCB-D4	Thomas et al., 2020
VIII. Mississippian Midcontinent Basins	KY-1-HB	Thomas et al., 2020
	MIB-070810-01	Thomas et al., 2020
	MIB-062510-02	Thomas et al., 2020
	MIB-062510-01	Thomas et al., 2020
VIII. Pennsylvanian Midcontinent Basins (Type 1)	NE-1-IC2	Thomas et al., 2020
	FCB-D3	Thomas et al., 2020
	FCB-D2	Thomas et al., 2020
	FCB-A1	Thomas et al., 2020
	MIB-072510-01	Thomas et al., 2020
	KY-6-DX	Thomas et al., 2020
	KY-4-CV	Thomas et al., 2020
	KY-15-CK	Thomas et al., 2020

## Sheet: 24 Sinks Neo-Tri AGE_HF
Neoproterozoic California (Wood Canyon)		Meso-Neoproterozoic California		Neoproterozoic-Lower Cambrian California		Lower Cambrian Sonora		Ordovician Sonora		Devonian Sonora		Permian Sonora		Triassic Sonora		Neoproterozoic Nevada-Utah		Neoproterozoic-Lower Cambrian Nevada-Utah		Vinni Formation		Ordovician Nevada-Utah		Silurian- Devonian Nevada-Utah		Carboniferous Nevada-Utah		Triassic Nevada		Cambrian-Devonian northern BC		Neoproterozoic-Ordovician southern BC		Pennsylvanian-Triassic, BC		Triassic southern BC		Pennsylvanian midcontinent basins (type 2)		Mississippian Midcontinent Basins		Pennsylvanian Midcontinent Basins (Type 1)		Harmony A		Harmony B
1292	7.01261	890	8.8	1199	2.53614	1131	1.76631	2683	4.82193	2877	4.29235	1282	0.539208	256	-5.28514	1086	7.5667	795	0.642335	483	3.64856	974	-5.33543	501	3.58522	996	-3.99036	229	0.37463	1768	1.88428	1048	-11.7629	424	-10.6595	277	-2.47386	307	-1.50791	365	1.45116	2620.4	-9.4387	673.36	0.400017	1870.79	-2.53641
1119	8.37457	930	7.8	1752	-0.707389	1213	4.26192	2699	4.28987	2086	0.387758	1624	-2.37194	1435	3.00767	1424	11.3856	826	2.87496	488	3.01127	1030	-8.57997	502	2.34378	1040	-7.34897	234	-3.33077	1778	3.54252	1109	2.88861	427	-9.64461	297	-5.83911	319	2.45707	377	0.927959	1911	-1.76842	682.14	-5.33929	1765.37	-6.55987
1675	0.231468	950	5.9	1073	6.41907	1124	0.0479682	1887	-12.7672	1724	5.16674	275	-21.5539	260	-0.53188	1171	4.43002	1069	3.81104	492	4.80811	1203	4.82097	1086	2.63604	1043	-12.3295	238	-14.8604	1786	-4.09523	1818	-10.1603	438	6.00444	320	-51.3888	321	0.973311	399.3	2.80277	1911	-8.17293	704.69	-1.63311	2734.98	5.73504
1414	7.21502	960	5.6	1196	6.26006	1673	4.50833	1788	-13.8558	1770	7.01854	1052	3.36561	278	-4.66442	1769	-2.06476	1087	9.10879	493	2.603	1815	-7.66393	1096	4.66606	1048	-6.94771	239.846	-3.50289	1788	-4.13544	1833	-5.18674	443	-10.0637	395	1.71427	338	3.44818	400.6	1.892	1905	-4.61949	716.73	1.88517	1786.48	-2.85484
1175	6.47514	990	8.1	1407	1.77763	1736	2.92531	2097	-5.37856	1448	2.34339	1431	0.62595	1423	4.26046	1190	10.0169	1096	5.06057	495	-1.61744	1819	-11.1457	1102	5.23859	1146	2.83099	261	-1.46067	1807	-8.02686	1834	1.6641	463	7.15962	420	-0.935839	340	5.13132	401.8	0.926437	1876	-16.3226	1028.7	4.86299	1775.07	9.02778
1085	8.46168	1030	10.5	1442	10.4504	1615	2.96347	1836	3.00268	1916	-6.09252	1063	3.25384	261	-8.13294	1421	7.37368	1124	9.41778	510	-0.893309	1827	-10.7668	1175	9.79822	1779	-6.88668	263	-14.2811	1823	-2.98924	1838	-6.4084	562	7.74784	421	-2.16813	360	-1.38284	405.8	4.18334	1858	-1.23391	1030.67	1.93918	1852.08	-4.43564
1101	5.46824	1070	7	1469	6.22206	1112	-3.35549	1810	-8.13051	1448	3.39507	1687	-4.34007	256	-19.1217	2780	1.88666	1125	5.95776	1084	4.54245	1828	-7.86966	1187	3.97442	1780	-7.15964	293	-1.40555	1825	2.78346	1840	-9.63612	1057	1.1354	427	-2.18271	366	-0.634038	413.5	-1.96777	1851	0.412079	1053.05	4.49559	2613.87	2.98092
1420	8.39439	1090	1.8	1452	3.03677	1089	-0.462562	1832	-9.73741	1705	6.46497	1224	9.17171	1454	1.88525	2768	7.4875	1135	4.81517	1433	4.94369	1834	-7.28246	1244	7.57193	1792	-5.35923	307	7.96184	1844	-16.6587	1841	-6.8026	1088	-12.8055	442	0.421745	379	2.67099	424.4	4.04329	1848	-15.8619	1070.19	5.37949	1793.28	-15.9289
1101	6.34028	1100	0.6	1216	9.02362	1690	6.213	2472	1.45797	1440	6.22526	1044	6.31994	278	-22.1435	1387	10.5204	1156	4.94939	1438	1.16603	1838	-13.5393	1255	7.71526	1795	-5.63079	318	-4.14682	1855	5.65923	1841	-5.79298	1091	-1.71712	488	2.12464	385	0.956839	432.8	2.28156	1846	-3.75896	1070.92	6.57341	2673.07	3.97127
1107	9.68572	1150	6.2	1669	2.33858	1434	5.15377	1866	-10.4205	1678	6.95701	1336	5.13122	1172	-1.981	1146	6.83512	1170	6.48396	1503	5.56018	1844	-9.35865	1275	6.24742	1797	2.63728	392	0.430223	1878	-14.683	1844	-5.15725	1129	-0.376477	496	6.4529	395	0.957884	433.6	-8.24035	1845	8.48119	1072.99	6.82777	2712.18	-7.91601
1103	5.8729	1150	2.4	1418	9.93074	1244	4.50273	1836	-9.72628	1464	6.3256	1674	1.2204	244	-21.6252	2711	-1.23034	1172	-1.43618	1664	7.39832	1845	-11.3209	1304	7.69835	1801	-4.69618	481.628	1.99451	1886	-0.74577	1858	-11.3145	1157	5.26944	542	-4.03508	404	7.22414	434.1	-1.77394	1839	-9.42752	1074.59	6.569	2612.44	3.85252
1417	9.89653	1150	13	2669	3.76857	1175	2.66518	1836	-17.6419	1221	4.96167	1270	4.25567	283	-20.9409	1718	-0.247413	1179	7.28687	1704	6.5937	1846	-16.4391	1416	3.03814	1805	-4.67804	512	3.6591	1887	0.529292	1861	-9.55181	1176	2.884	557	3.70389	412	-1.67073	434.9	7.2911	1837	9.13806	1088.91	7.49213	1792.67	-13.513
1042	8.33725	1150	6	1414	-1.27446	1291	3.55483	1065	-26.949	1457	3.73622	2690	2.83782	259	-21.602	1364	3.86616	1221	8.28136	1711	8.94865	1850	-7.2785	1424	4.71892	1817	-2.70747	513	-4.56111	1890	-23.4681	1892	-6.47981	1184	1.18437	561	-0.913076	415	-0.438247	435.7	3.10982	1834	-22.8467	1090.56	9.71979	2693.45	2.51592
1109	6.6472	1150	4.3	1224	7.51393	2186	-0.493243	1854	-4.69416	493	2.37027	1639	-0.0314503	1409	4.36101	1066	3.91119	1221	6.00661	1715	2.18988	1856	-10.275	1434	-2.61	1831	-5.63147	517.316	2.79388	1894	-6.60788	1895	-6.97784	1331	-7.78759	561	1.52348	415	2.50385	439	-4.6327	1830	-8.00318	1090.74	7.32821	1786.5	3.54275
1711	9.0887	1180	3.9	1244	5.01343	2846	3.1043	1915	2.82446	1450	2.27315	436	0.010196	272	-20.4915	1419	11.7064	1329	9.58137	1718	1.06627	1870	9.78625	1441	5.73463	1831	-8.36956	524	0.965251	1900	-11.9161	1906	-8.89556	1334	-1.04073	565	-6.81206	420	-2.084	440.6	-5.35848	1812	-12.223	1091.3	9.47471	2651.76	-3.01607
1171	8.73221	1180	2.7	1006	4.66464	2646	-4.03663	1823	-8.97753	1133	3.13155	1661	4.01179	1457	6.31662	1657	0.15847	1334	7.57951	1722	2.61157	1872	-5.17506	1441	6.09156	1834	-9.01426	525	1.30134	1905	-11.5757	1914	-1.93541	1345	2.39687	605	2.75169	425	5.40298	464.2	-9.92506	1750.3	0.920039	1091.88	7.49679	2688.16	0.819105
1142	7.4921	1190	4.7	1423	2.41484	2384	-3.7913	1936	-13.1021	1436	7.42943	1250	1.23765	239	-20.5675	1434	7.07376	1358	7.46912	1724	2.82501	1885	-1.10315	1443	5.76779	1834	-9.00835	533	3.26004	1915	-7.99946	1971	-3.97489	1356	0.190801	611	-3.21705	425	0.0789572	471.9	-9.86262	1578.3	8.21483	1106.04	6.34999	1801.1	-3.10052
1085	10.2616	1190	1.1	1441	5.84004	1922	6.70856	1938	-8.01521	2764	-3.16395	1661	2.56874	251	-21.2497	1326	8.58769	1370	9.08314	1738	6.26041	1912	-3.53915	1447	7.85086	1835	-9.28908	987.768	-2.49993	1919	-10.9372	1974	-4.5425	1412	-0.588833	615	-1.46264	433	3.35701	482	3.19073	1484.7	3.38531	1107.7	9.37188	2593.06	1.32125
1045	7.35121	1200	16	1440	3.35762	1763	4.15164	1878	-14.8904	1659	4.64869	1014	-16.0353	1439	0.617484	1168	7.02581	1399	5.7058	1747	6.17173	2056	-3.25851	1448	6.01605	1835	-4.20993	1015.73	-2.28827	1921	-9.23045	1992	-7.61244	1423	9.89058	1029	2.59369	463	-9.78331	542.9	7.87351	1204	6.49336	1108.17	7.5773	1786.77	-1.69421
1077	4.93006	1200	3.5	1653	5.01679	1178	7.4876	1845	-9.24982	1832	-1.73866	1752	4.21001	228	-9.69973	1152	4.90436	1404	9.09705	1758	8.36777	2071	-4.98307	1449	9.01285	1836	1.535	1021	3.40958	1926	-14.5117	2081	-2.54522	1428	-1.60006	1030	0.272527	535	-10.8163	558	6.92437	1203	-1.99648	1108.76	7.08244	1863.65	-3.81334
990	3.82834	1210	4.3	1729	7.48615	1113	0.646293	2706	2.54141	1452	3.32528	1656	2.14538	1460	4.8202	1090	1.71868	1420	5.46642	1761	2.56291	2073	-0.627391	1452	6.06497	1840	-8.58734	1039	2.36734	1932	-9.47082	2099	-0.0232594	1428	2.31487	1032	4.07475	545	-1.58773	610.6	0.204588	1189.6	4.81429	1128.65	10.2006	1843.21	-4.24368
1115	1.91789	1220	7.6	1440	3.46693	1424	3.30374	2684	5.06836	1660	8.83328	1639	1.23505	251	-26.3204	1314	8.74098	1429	7.38231	1767	6.43461	2073	-3.00345	1452	7.04899	1841	-8.3598	1042	4.82307	1933	-7.92223	2130	-0.767831	1437	4.26243	1037	5.74977	546	-2.32451	645.5	5.49317	1182.6	6.92516	1129.05	3.60684	1831.75	-3.80299
1062	8.85766	1220	1.2	1186	4.19897	2614	-2.37678	1831	-12.7866	2630	1.07878	1770	4.22409	1453	1.62569	1088	6.4378	1437	5.99839	1775	8.26821	2076	-4.69811	1454	8.047	1843	7.37666	1110	5.55822	1959	-9.11573	2144	2.94199	1503	2.71285	1049	3.10053	564	-3.54556	693.7	-12.6941	1180.5	4.14197	1152.91	5.39802	1851.73	5.22546
1070	8.85338	1220	6.8	1011	4.65494	1168	4.3521	1890	-10.9241	1759	10.3024	1040	3.55829	1420	3.40587	1835	-4.54455	1460	2.07144	1781	-0.596329	2076	-5.55593	1461	6.2689	1843	-2.49535	1181	8.72998	1969	-5.17695	2314	1.82192	1534	4.39396	1050	5.99572	580	-1.76846	706.1	10.6523	1180	3.28462	1154.35	3.56186	2589.96	3.50637
1269	6.57731	1220	11.1	1099	-2.54843	1442	-1.04398	3219	-2.05104	1893	-3.56901	1016	4.80201	1446	6.89597	1967	-5.0843	1462	3.36193	1788	3.02027	2094	0.227346	1462	5.69571	1845	2.91956	1237.26	5.62331	1986	-4.46653	2565	0.493808	1716	4.20246	1056	6.32819	583	4.2736	873.9	-4.07399	1173.5	-2.68923	1187.1	8.02965	1826.94	-19.7637
1071	1.16162	1230	2	1896	-6.43815	2654	2.06359	1856	-7.11172	1459	3.57044	1916	-13.055	248	-5.20461	2626	3.1145	1465	4.18621	1792	7.30417	2097	-2.78746	1468	7.39888	1848	-7.09574	1420	1.92751	1986	-6.15537	2646	-2.93341	1733	0.865267	1060	0.833145	950	-0.53998	923.4	-0.100397	1171.7	4.99503	1190.06	4.1198	2718.44	2.72133
1087	5.75523	1230	2.3	1409	3.18581	1691	5.47648	2564	-10.2924	1690	5.74017	1184	5.24814	1427	5.26533	1283	8.24218	1494	7.36912	1798	-10.1989	2313	-8.01118	1472	7.01418	1849	-4.42097	1437	5.2527	1991	-3.49538	2674	-3.22058	1741	5.60128	1069	3.64235	962	1.10894	956	1.35038	1171.6	7.48124	1212.53	8.50971	1790.86	-1.47713
1117	7.88928	1230	8.1	1031	3.50405	1271	4.09952	1697	-9.82285	2745	-7.92989	1236	-0.852754	258	-6.43478	1088	-2.52645	1778	-4.66487	1838	-0.620889	2567	0.663508	1649	8.72067	1850	-4.77425	1437.55	4.76908	1993	-9.96267	2710	0.832826	1809	-12.1955	1092	4.85779	964	1.69926	991	0.41981	1171.1	4.80549	1313.35	10.2541	1771.13	-4.5409
1080	6.25781	1230	6.3	1207	2.93831	1118	-2.30864	2738	4.1126	2124	1.01046	2084	-0.228897	1427	2.37192	1172	2.65417	1780	0.149346	1852	-2.23818	2583	-4.15887	1672	6.2429	1852	6.91133	1442.59	5.50329	2001	-5.43166	2761	1.28683	1814	3.14304	1105	8.15618	984	-13.8384	1012	2.66266	1170	4.4781	1349.56	7.09283	2607.65	2.73566
1153	8.33808	1230	5.5	1445	3.19692	1120	-0.250062	1876	7.00622	1422	0.753477	1810	1.66592	230	-10.8522	1156	0.945806	1784	-4.31093	1893	-2.48462	2603	-2.19639	1688	2.20439	1879	4.95872	1445.15	5.69787	2024	2.5969	1124	-4.50798	1835	-9.39636	1125	3.88871	1022	2.38568	1022.8	-4.16524	1167.9	7.04918	1369.21	9.5475	1856.18	-5.2882
1040	5.05791	1230	6	1683	7.88699	1446	6.01947	2315	-3.60835	1710	7.76781	1254	-10.5457	231	-12.038	1140	4.12865	1789	0.980762	1906	-1.5837	2696	2.05529	1689	9.26159	1879	-13.6593	1449.3	3.65768	2052	-1.45326	1181	-37.5979	1838	6.75765	1157	3.58181	1032	1.96837	1034	3.88402	1164.1	7.65653	1369.96	8.49165	1786.75	-5.04907
1050	6.39486	1230	5.9	1862	-5.47527	1117	4.57217	2707	5.61886	1433	5.37686	3542	-1.43723	253	-21.1172	1048	-1.24934	1792	0.981266	1936	3.44138	2711	-4.10263	1691	8.72658	1884	-4.80509	1450	2.47461	2343	-6.60351	1774	4.52673	1842	-8.97134	1172	5.47555	1039	1.70109	1036.2	2.39663	1155.1	14.8253	1468.01	4.92753	1867.15	9.16298
1163	6.77656	1230	4.4	1265	6.47455	1120	4.1427	2355	0.453586	2132	-0.803709	1429	2.3266	1444	1.13512	1832	-2.16553	1799	-0.716456	2069	-18.5547	2742	0.0813025	1692	2.55028	1899	-5.04427	1451.7	9.8107	2352	1.93093	1777	-11.1268	1972	1.85641	1203	2.5635	1062	3.64555	1045.7	6.18796	1154.3	4.23616	1470.9	5.88503	2586.65	1.83096
1114	6.20106	1250	23.5	1444	2.49597	1694	6.41756	1690	-17.9191	2093	-1.6509	1030	4.64909	269	-7.81296	1252	-1.72662	1800	5.60607	2094	1.61832	2745	0.69305	1694	-8.46859	1900	-7.50913	1455	4.31707	2364	-14.4878	1784	-4.96971	1973	4.60567	1356	7.62587	1077	4.14287	1051.7	1.27771	1150	4.24052	1668.22	5.84151	1783.38	0.653454
1113	9.78369	1260	8.4	1757	7.67595	1123	0.55134	2708	2.30704			2554	-2.74189	248.031	-3.47525	1175	2.09642	1811	-4.97382	2377	-3.93824	2877	6.21585	1698	5.32852	1904	-7.49241	1459	6.6994	2391	-11.5001	1791	-6.62079	1996	2.78679	1438	6.77846	1082	2.70397	1090.8	3.63185	1149.4	4.27786	1723.53	22.6781	1772.51	-10.3746
1151	6.90392	1280	7.8	1035	6.56646	1428	2.49651	1141	-3.76633			1638	4.41656	1999.88	2.46601	1078	4.77773	1834	5.24073	2458	-4.24239	2951	1.37195	1700	2.00446	1905	-8.06621	1461	2.93367	2400	-4.15759	1798	8.00747	2003	-1.45302	1757	7.09177	1093	0.682474	1091	5.21836	1148	3.91753	1735.87	10.3365	1869.92	8.42251
1107	10.0918	1290	7.5	524	0.198902	2927	2.22804	1780	-18.1064			1054	0.359329	1691.59	10.0042	1782	3.37659	1836	4.76551	2467	-1.86427	2970	-4.1222	1701	5.80541	1907	-5.87825	1469.06	8.63543	2402	-4.10593	1811	-7.2081	2121	5.74611	1778	3.84033	1107	4.41735	1101.6	3.72772	1142.7	6.70405	2549.11	-8.73969	2585.96	-3.9152
1453	1.1562	1300	2.7	1243	5.4263	1756	5.86291	2659	-3.45845			1636	4.3451	238.434	1.61291	2715	2.11205	1938	-14.248	2555	-4.07201	1054	-13.5434	1702	10.5973	1912	-4.44112	1636.92	7.15271	2409	-12.793	1811	5.4668	2363	-9.04213	1781	-6.09344	1124	4.76314	1122.9	2.25451	1141.1	3.31399	1009.26	6.7878	2693.28	2.95029
1677	3.87256	1310	4.2	1304	11.0645	1436	3.03883	1859	-5.71838			1668	4.1121	3045.91	0.654516	1061	2.98733	2623	2.40305	2566	-0.264209	1055	-7.50384	1708	6.67394	1914	5.9356	1655	5.77792	2449	-2.9511	1821	-4.09258	2398	-8.24407	1823	-2.53845	1135	3.25555	1135.8	4.83771	1140.7	6.39427	1026.93	3.46772	1783.89	4.40745
1216	4.37867	1310	10.8	1729	4.68937	1452	0.607979	2729	2.703			2815	3.08029	1655.02	4.70645	1187	2.74971	2651	1.1564	2572	-5.59758	1809	-8.85134	1708	6.63949	1916	-8.22931	1656.93	-1.38038	2455	-2.80139	1832	0.607258	2740	-3.94428	1830	-5.10659	1140	4.49579	1159.3	-0.693085	1137	4.47964	1039.56	6.82928	1855.72	-6.27277
1087	-4.03518	1330	4.9	1420	5.16405	1745	4.58379	2618	3.60294			1142	5.93978	1734.29	3.25668	1081	7.2887	2694	1.04366	2591	1.12236	1829	-6.98969	1711	-0.518239	1923	-5.08146	1657	3.42421	2478	-2.95014	1832	-8.53783	2790	-3.60785	1879	-4.18384	1149	8.34862	1164.4	-4.03805	1133.3	3.63125	1044.44	4.72156	1774.33	3.69252
1080	6.67878	1330	8.6	2868	-2.81959	2591	-4.32374	2082	-10.5214			1852	-9.00384	1820.69	5.27044	2618	4.21702	2698	2.41407	2703	1.72114	1833	-10.668	1716	2.47449	1984	-19.4897	1679	6.23173	2493	-0.962397	1850	0.910254	3035	4.83997	1895	-4.3293	1156	5.65056	1167.4	3.58485	1125	4.20822	1055.18	7.52388	2586.42	3.19738
1038	7.83208	1340	4.8	1103	7.30654	1484	2.17673	2730	3.42513			2567	-6.7827	1442.16	10.2571	2702	3.25614	2700	3.16995	2716	1.84849	1833	-5.20139	1717	2.42586	1998	-7.38334	1692	0.547276	2544	-2.36646	1854	-8.31488	3112	-2.44088	1912	-7.28595	1160	4.66124	1180.1	4.71173	1114.7	0.415234	1063.71	5.99823	1766.25	-16.5734
1426	6.73782	1340	5.6	1712	6.08117	2180	-1.4896	2716	3.66947			1102	0.604314	1248.98	9.31768	1934	2.3113	2717	2.2096	2781	-0.711343	1833	-3.09096	1722	2.56388	2031	-5.44166	1734	8.73504	2569	-1.05492	1855	2.89556	3301	4.5925	1982	4.36776	1174	5.03894	1200.2	5.42614	1113	4.19722	1072.71	7.78828	2576.36	4.70235
1092	9.58657	1350	7.6	1689	4.80011	1732	4.10722	1860	-16.2716			1843	-8.08503	1415.43	5.33077	1190	5.56461	2718	1.63482	2785	6.09143	1834	-8.25024	1723	7.92736	2077	-2.6688	1751	5.21241	2594	-0.753734	1862	-17.0815	400.426	-0.26245	2013	6.4813	1196	3.22483	1280.2	-0.644436	1101.6	3.04614	1075.94	7.99707	1857.33	7.8025
1301	8.71946	1370	7.5	1676	8.44454	1154	4.62178	2563	3.02172			1134	5.33126	1721.53	9.09523	2707	-13.4865	2780	-1.90324	2897	-1.04021	1836	-6.84779	1727	7.71021	2137	-22.115	1768	1.86472	2599	4.13024	1873	7.15256	415	-5.29033	2051	-9.32066	1808	-1.57649	1360.8	2.81084	1101.4	3.36781	1087.84	4.9045	1769.79	-14.6914
1143	8.21583	1370	6.8	1694	-0.077251	1452	-2.79393	2848	3.9197			1080	-4.88824	1127.02	7.89642	1461	8.56995	2790	-4.01419	476.2	-4.34465	1836	-5.93533	1728	-28.6474	2214	-0.456445	1802	-2.07831	2603	0.327233	1876	-10.9222	420	-11.3503	2084	0.803284	1812	-3.84274	1400.4	6.19966	1100	5.18635	1093.48	6.40792	1756.2	2.23336
1123	4.83543	1370	8.5	1782	-1.0031			2828	2.01081			380	-0.515842	243.675	3.00885	2769	-3.86665	1055	1.44838	483.04	0.438855	1838	-11.8189	1737	7.44211	2379	-8.41865	1835.79	-8.63862	2606	0.324866	1880	3.80025	423.752	-3.19568	2084	-6.91071	1977	0.630411	1523.4	8.19792	1096.8	4.25784	1102.9	8.92429	1775.52	-5.67545
1116	8.29379	1370	4.8	1756	9.27493			2920	2.92545			1646	7.90092	1802.2	5.88192	1755	6.76757	1063	-0.194072	485.63	1.08378	1841	-5.6652	1740	8.34639	2397	-10.1672	1851	-14.3494	2624	0.888878	1889	6.40147	438	-13.6268	2516	-3.04243	1980	-2.31173	1536.7	0.816456	1096	3.98786	1104.96	3.49454	1784.51	-0.186675
1050	4.47786	1370	6.8	1686	8.20973			1905	6.16379			1917	-2.49576	1435.69	5.41737	1418	8.79822	1085	10.9017	493.42	-0.381901	1844	-7.72818	1753	8.43133	2485	-5.4268	2807	1.54236	2695	3.4521	1891	-4.56708	447	-3.40088	2734	-9.6306	2004	-1.53621	1640.2	-1.14821	1093	5.0612	1115.54	7.038	1777.13	-4.8628
1076	6.77173	1390	13.5	1117	1.67382			2934	1.58591			2681	0.266564	1404.08	0.676425	2709	5.46678	1129	0.270538	494.22	0.832763	1844	-10.2688	1758	7.02421	2527	1.43801	219.132	-2.31415	2727	1.48947	1999	5.77984	453.076	-4.69969	2745	-0.886775	320	6.45497	1641.7	-1.24267	1089	4.854	1122.07	8.71458	1825.11	-1.20148
1102	6.68578	1400	6.8	1907	-14.0341			1882	-19.3604			1435	5.73632	1090.63	8.65939	1280	10.7723	1133	7.04682	494.85	1.03776	1844	-2.41918	1759	6.44648	2583	0.631234	220.514	4.84246	2786	-7.52352	2163	-6.38075	501.032	-8.60895	2770	-2.26838	332	6.51755	1647.2	5.55998	1084	4.90487	1133.14	9.24059	1783.16	-0.399261
1120	9.0303	1400	8.2	1711	8.03024			2680	1.63285			1861	-5.15921	1752.61	8.34904	1138	10.5695	1148	4.17253	495.23	0.916166	1845	-7.99067	1773	6.69011	2599	1.9825	222.27	-3.50966	2827	-10.4816	2543	0.211469	536	-1.30662			356	5.18636	1650.1	0.554112	1083	3.85605	1146.27	2.01714	2577.55	1.62963
1110	8.25267	1400	5.8	1813	-9.20991			1790	-12.5654			2725	3.76889	1746.67	5.50244	2829	6.43116	1409	-0.300888	495.74	-24.188	1845	-9.61531	1774	6.29517	2600	1.01903	224.763	-3.52935	2830	5.91514	2575	2.7092	543.631	2.93137			363	0.803621	1652.6	1.40461	1080.6	3.92815	1151.72	7.46914	1830.91	-3.39059
1077	4.56396	1410	6.2	1442	2.80364			2719	1.5754			1423	4.14726	1113.77	6.57556	1187	8.57454	1414	-4.62776	497.33	-20.7313	1846	6.71708	1789	6.48778	2624	0.279152	251.842	-1.04427	2858	0.986169	2576	-0.224	952.552	-0.681376			373	-0.530983	1721.2	0.649033	1080.1	7.47411	1156.66	3.57912	2686.33	4.58261
1075	6.43887	1410	10.4	1162	6.25673			2668	0.0730491			1851	-8.29721	1065.44	3.8925	1114	7.06141	1417	3.08235	497.33	2.85049	1848	-6.4807	1796	6.06978	2643	-0.0500913	259.55	-5.79795	2869	-2.85304	2704	1.71159	1024.9	3.66118			386	3.9475	1733.6	4.4846	1079	3.45862	1157.9	5.73852	2576.36	0.120302
1078	3.75719	1410	7.4	2907	-2.24549			2731	0.0181979			2752	-11.1409	1776.55	10.7922	3164	-4.29221	1437	-1.01958	1116.85	5.23834	1849	-3.98965	1807	8.77499	2659	-5.33711	284.937	-5.31176	2884	-8.68736	2744	-0.823361	1050.86	5.99543			404	-3.49318	1735.2	6.98766	1078.4	4.55242	1166.62	6.28437	1784.06	0.380162
1114	7.04929	1410	8.9	1418	2.52421			2706	-5.21306			2739	3.01727	236.173	2.45538	1177	3.83421	1442	5.83598	1421.81	6.85638	1849	-9.93214	1955	4.09178	2676	-1.33668	401.376	9.81114	1023	-26.7573	2761	3.98407	1060.71	-0.374698			405	3.05492	1739.9	3.39922	1077.5	5.36803	1168.65	6.30935	1736.4	-5.44348
980	6.25615	1420	8.2	1443	6.67071			2678	-5.25132			1465	7.58582	238.588	2.14282	1458	7.67344	1445	4.72925	1433.35	3.96529	1850	-8.45579	2568	1.47099	2707	3.60318	411.253	4.88202	1038	1.26323	2926	-8.26107	1074.02	4.44571			410	1.00295	1740.8	-0.327741	1068	3.82692	1184.08	2.64881	1753.67	-3.71416
1284	2.70948	1430	8.6	1424	6.60333			2704	-11.9214			1492	0.948482	237.638	-2.59547	2780	4.76052	1446	0.264317	1433.82	3.18766	1855	10.4817	2734	1.99135	2711	-2.90608	426.001	5.98257	1044	5.30817	2947	-0.0721144	1088.83	-29.3434			412	0.471424	1789.8	-3.91272	1067.9	4.0179	1215.66	8.57179	1768.21	-4.71623
1111	8.12384	1430	5	1736	-0.255056			2704	1.03014			1844	-5.15542	242.03	0.57928	1447	3.9328	1452	5.75913	1435.41	7.07609	1857	0.734129	3467	-2.16596	2729	1.16832	443.143	4.68483	1045	-7.11017	2959	3.63445	1100	5.1816			413	-1.10274	1901.7	-5.64531	1067.5	3.88719	1232.99	10.5368	1771.13	-9.77698
1109	8.48807	1430	2.7	1102	5.46481			2788	1.91053			2714	-9.09583	1179.44	-1.17714	2701	0.702694	1461	3.70921	1444.46	3.01464	1868	7.76656	1822.83	2.58677	2751	2.63775	460.53	4.14959	1073	-7.73397	2963	0.253346	1101.02	4.64403			415	-0.29551	2360	-5.63322	1065	5.29501	1252.5	8.62383	1775.76	-5.32361
1097	6.18645	1430	7	1456	4.19897			2699	0.775921			1955	-8.32366	1086.39	3.73646	1783	-5.16617	1463	1.32556	1693.56	7.07551	1872	-7.58395	1823.83	-2.91168	2919	-4.91901	511.555	5.896	1087	-6.03295	2988	-3.52796	1122.08	5.00987			417	1.8747	2551	-1.07532	1064.2	4.97413	1264.57	4.46453	1784.08	-4.03766
1077	5.45035	1430	5.6	1810	5.73852			2695	-2.84867			1210	-5.18219	265.689	-20.4965	1054	4.57419	1731	10.3323	1693.81	6.55761	1877	4.94754	1826.17	-8.51946	2938	-0.558145	522.983	5.88509	1809	-10.1135	3004	5.70065	1146	1.79503			423	2.1939	2689.5	-0.699224	1063	4.35488	1332.84	9.72375	1791.09	-2.54554
1097	6.54978	1430	7.8	1087	3.02993			2736	-0.369531			680	-2.9366	1640.1	4.90839	1139	7.57128	1732	8.5779	1707.89	6.45267	1887	-6.17613	1831.67	-5.80261	340.154	-30.5356	522.983	8.20026	1822	-9.36054	3050	-4.97975	1163.83	0.406385			426	3.78711	2732.4	1.94407	1063	4.05338	1338.21	6.7064	1792.7	-3.43052
1082	7.25032	1440	4.5	1799	-26.3687			1050	-30.3879			2000	-4.0014	226.168	3.35359	992	2.58493	1744	4.31217	1713.08	3.45096	1889	-12.4073	1834.75	-7.28645	1135	7.94432	523	4.66208	1835	-8.12555	3123	-2.13676	1201.14	-2.70758			429	-1.66867	2740.9	1.94631	1063	5.77022	1367.73	4.92023	1797.9	-1.98403
684	5.45242	1440	7.6	1886	5.64279			1844	0.683164			1852	-8.38884	1070.31	5.64603	1142	6.86818	1751	6.44371	1715.99	0.983168	1892	-11.7793	1834.91	-6.33735	1764	-9.15774	562.902	3.37102	1839	-6.79215	3335	1.69078	1228.06	6.69987			431	5.60047	2993.8	2.73036	1062.6	7.62472	1378.06	7.88664	1798.37	-3.10911
1336	7.77355	1440	6.2	1511	4.0904			2676	2.04009			2927	3.63574	1765.86	10.5307	1913	8.87957	1793	-0.836154	1717.44	4.62525	1894	-5.92091	1835.51	-7.09314	1777	2.10919	568.133	4.97882	1848	-6.75072	3389	-0.839442	1256.35	2.46768			454	3.99314	793.7	-0.265776	1062.3	-0.141879	1385.09	9.80071	1802.14	-3.71342
1077	8.25725	1440	3.2	1434	4.29792			2671	-2.07181			1481	6.08952	1763.86	9.81541	1440	1.5526	1793	-1.11485	1724.45	3.68697	1909	-5.92869	1835.67	-2.42037	1784	-4.22445	655.479	8.23176	1850	-8.86653	3551	-2.38182	1295	5.14254			460	-0.482404	791.7	-2.78379	1061	4.76013	1387.12	9.48347	1804.63	-2.74345
1086	6.45959	1440	7.4	1762	4.56457			1879	-0.520802			1091	6.50917			1124	8.22529	1798	3.89749	1732.63	6.35579	1924	-4.4057	1844.98	-9.08221	1793	3.72854	678.671	-6.70145	1850	-3.77024	675	0.407692	1326.03	3.65479			492	-0.0104564	787.3	-6.44533	1060	3.50739	1456.49	7.72054	1833.2	6.22872
1056	6.3045	1440	9.6	1717	8.30669			2696	-5.26139			1446	6.90049			694	4.70079	1798	2.70767	1732.92	7.5421	1925	-8.85446	1845.98	4.09445	1812	9.34618	1003.21	2.78976	1854	-5.71561	1778	-2.26968	1343.97	5.00531			496	5.60578	782.4	-4.97446	1056	3.18871	1460.96	8.71306	1841.38	-7.10044
1094	8.15857	1440	7.8	1452	4.05809			1956	-10.1159			1840	-6.08315			1371	9.30136	1799	-0.377423	1736.22	10.5271	1931	-5.68162	1846.02	-2.22691	1824.72	-3.39888	1017	6.60256	1857	-7.61972	1784	-2.05553	1385.25	4.86614			534	2.26591	774.5	-13.229	1055.9	2.78959	1469.16	8.84097	1851.37	6.74688
1112	5.29149	1450	6.6	1438	2.74867			2670	-0.363229			1844	-6.60008			1134	7.8171	1812	3.7638	1743.83	10.0208	1935	-4.68285	1846.68	-10.3874	1830.94	-5.1953	1024.72	3.9361	1878	-11.024	1790	-5.44472	1414.55	-1.93079			537	0.756763	697.1	-5.14049	1054	2.31996	1481.76	6.90707	1862.33	11.0598
1125	12.0844	1460	7.3	1426	4.11961			2745	1.92218			2678	-7.04481			1028	6.38987	1817	-2.36673	1744.39	8.95354	1947	-4.69536	1846.69	-2.20961	1844.71	-10.5389	1035.11	6.56423	1910	-2.43745	1792	-2.32799	1420.23	-21.4765			544	2.73814	677.4	7.67567	1053	3.84993	1786.45	-12.413	1863.26	-6.29168
1115	3.19472	1460	14.5	2911	1.79901			2905	-11.0399			1855	-0.375432			2809	0.688448	1829	-1.00843	1767.88	5.76861	1947	-10.194	1847.42	-1.93303	1851.35	-6.1298	1036.13	5.35966	1914	-12.3376	1793	3.2691	1447	10.6603			582	7.65026	660.3	4.37849	1051	0.0982215	1793.91	7.83531	1870.06	8.21327
1125	7.00627	1460	6.8	1413	6.42714			1883	-16.1861			1048	-8.54686			1434	1.69679	1835	-0.119272	1774.33	1.73459	1958	-4.45483	1848.57	7.91434	1870.44	7.28425	1040.36	5.88051	1922	-3.37425	1794	-3.9083	1449.41	5.49173			981	-0.970114	652	-15.957	1050.9	3.69236	2686.96	4.40444	1885.18	9.03917
1088	3.76561	1460	6.8	1857	8.31071			2592	-1.38889			1100	4.20165			1149	6.1825	1838	3.36584	1783.13	6.55073	2046	-4.93201	1848.94	-2.16567	1886.49	-4.84057	1040.36	5.32138	1929	-5.36719	1795	5.17261	1526.42	7.78812			1005	2.10934	640	-4.21209	1050	0.593479	1063.68	6.43996	1897.91	10.2752
		1460	7.5	1685	2.95956			2785	-2.77478			1446	3.74699			1072	5.10116	1839	-0.215893	1785.13	0.00384129	2048	-4.51193	1850.34	-3.07263	1886.86	3.82588	1078.08	9.53236	1934	-2.70416	1795	-0.277045	1562.31	6.56405			1022	-1.75014	639.7	-38.8038	1049	4.22318	1460.29	5.24311	2492.32	-0.34709
		1470	9.3	1672	8.85817			2726	1.85767			1450	7.50291			1107	7.00373	1843	6.48635	2488.52	-0.60645	2067	-5.37965	1853.04	-2.22171	1893	-1.05048	1078.89	7.42648	1937	-4.69471	1802	1.76177	1632.36	-2.64146			1049	-2.68873	637.1	10.8197	1048	-0.440264	1056.75	7.24763	2620.36	3.80857
		1480	8.3	2945	0.532219			2781	-3.01725			1435	4.65188			1366	6.53624	1846	-2.04194			2074	-0.377593	1860.17	-0.930263	1907.19	-5.44597	1132.21	7.17085	1939	-0.515707	1830	3.73619	1636.8	4.52801			1067	3.81399	636.4	-13.0627	1046	2.11112	1395.6	8.30672	2626.25	4.76275
		1490	7.6	950	4.8			2740	0.990317			599	-24.4232			1162	2.82045	1846	-10.467			2076	-1.04472	1870.55	-2.81713	1923.29	-10.208	1177.04	8.39042	1943	-5.90746	1854	-0.760682	1650.86	1.99046			1086	4.12696	631.9	-9.22434	1046	3.95992	1182.89	9.61644	2719.73	-1.10562
		1490	11	990	5.9			2710	2.61122			2101	-6.59268			1120	8.92061	1906	4.23877			2098	-1.30483	1884.94	6.59758	1954	-3.92245	1204.77	9.12877	1945	-2.29393	1856	-11.2565	1668	8.9805			1090	4.70097	629	0.637543	1045	3.75913	1324.79	6.80469	1749.8	-1.30202
		1500	7.9	1000	5			1872	-15.2917			1425	5.96808			1105	4.96044	2536	-3.29981			2117	-12.4637	1895.96	-5.70296	1955	-7.12674	1413.29	0.158534	1956	-12.1884	1856	-10.7261	1679.28	-5.41783			1093	5.02708	623.2	-12.6791	1043	3.23692	1398.95	9.09091	1762.44	-1.3628
		1610	1.4	1010	3.5			2744	0.938292			2719	2.38433			2905	3.33044	2545	2.63122			2295	1.82843	1895.96	-1.56251	1957	-15.6749	1420.47	8.91136	2079	-15.5792	1868	-5.95159	1697.43	-0.596777			1094	3.11534	616.3	-2.73273	1043	4.14434	1492.75	18.6529	1773.41	-3.04617
		1620	8.3	1030	5.6			2744	2.75504			1368	6.24778			1801	2.17263	2568	0.319521			2524	-2.12432	1913.5	-6.9153	1963	-6.66302	1421.16	7.62697	2095	-0.885749	1871	-15.3047	1726.6	2.10391			1098	3.10696	610.3	4.19283	1040	-2.72983	1220.94	-0.878509	1774.9	-4.30061
		1630	2.7	1040	6.5			2710	2.95784			1425	5.48404			1414	7.61918	2570	-8.3065			2563	-8.58454	1917.34	-5.78568	1964	-2.7665	1424.52	7.36188	2099	0.223299	1890	-3.92642	1737.7	1.07068			1099	1.75998	610.2	-26.3885	1039.9	3.68647	1163.96	6.58049	1776.04	-3.39455
		1630	5.5	1040	2.7			1807	-14.8628			1778	1.16738			1124	9.14967	2630	-3.4462			2570	3.93767	2068.86	-2.03886	2008.51	-5.31226	1436.5	4.94391	2104	0.547369	1911	-0.030645	1755.92	6.47922			1103	3.2929	596.5	-1.85989	1036	-6.46485	1096.99	5.88124	1776.57	-2.64672
		1650	6.4	1040	5.6			2882	5.08189			1073	4.52251			1074	6.46777	2667	-7.68809			2612	3.38533	2078.18	0.194593	2042	-6.6633	1441.69	8.77138	2387	-10.5746	1922	3.28513	1773.62	-20.1998			1112	4.26864	558.3	-3.85388	1032	0.03061	1728.75	2.05417	1777.58	-8.21936
		1680	13.7	1050	4.1			2587	-4.35995			1475	5.65074			1237	9.77517	2677	0.101053			2671	-2.07098	2083.76	0.588782	2043.51	1.81216	1445.03	7.9181	2524	0.13865	2042	-3.15996	1787.75	-4.71204			1112	5.59379	554.4	0.424764	1032	-0.271976	1157.61	6.14941	1783.52	2.06992
		1690	6.3	1060	2.5			2611	-3.4938			1989	-4.32702			1123	8.89466	2689	-4.99652			2679	-10.863	2084.03	-0.317057	2076.41	0.306651	1896.93	3.98763	2577	-6.38618	2095	-3.88351	1789.9	-7.8062			1121	4.89817	547.8	1.00301	1030	4.35966	2699.76	-1.54418	1784.61	-2.591
		1690	4.9	1070	4.6			3040	-4.85556			1869	-6.61727			1032	7.44699	2738	0.260562			2679	4.98522	2088.07	0.202545	2085.98	-2.04085	2731.18	0.456755	2583	-2.50352	2265	-5.49392	1797.33	-1.97378			1122	3.53991	546.1	-5.0663	1028	1.99516	996.47	21.9596	1784.89	-2.32247
		1700	4.1	1070	2.3			1795	-26.0617			1426	5.14004			1467	10.2788	2767	-10.7863			2683	-0.977971	2606.16	26.0023	2088.66	3.98327	2754.39	-1.61627	2658	-5.90283	2326	-11.0743	1808.3	-4.49306			1141	2.34393	543.1	-3.27863	1027	3.48497	1072.06	-8.08045	1787.59	-3.80508
		1700	6.1	1080	5.2			1859	4.70887			1094	6.44494			1419	8.26686	2934	2.74716			2701	-14.2699	2620.51	3.37589	2092	-1.5628			2691	1.26123	2583	-3.46034	1811.07	6.63073			1151	3.54965	521.8	-3.34183	1024.7	-15.5894	1002.85	4.49478	1787.69	-5.21098
		1700	6.7	1090	0.2			2976	3.79384			1821	-7.26392			1419	9.48475	3158	-0.32891			2708	-2.87695	2716.81	-3.50137	2190	-4.01465			2718	-2.5093	2611	0.276168	1842.72	-12.1608			1182	-0.258707	517.8	6.51149	1024	2.84855	1145.94	10.9465	1788.45	-3.02767
		1710	10.4	1090	5.3			2841	3.23018			1888	-9.45553			2783	4.00144					2708	-2.65902	1786.29	3.42187	2207	1.02478			1681	7.2577	2620	1.69377	1850.51	-14.1496			1193	4.27469	505.2	-5.56645	1024	2.21028	1797.04	-4.45138	1788.49	-5.99944
		1720	5.1	1090	4.9			2627	-6.22381			1272	5.68002									2715	-0.404124	1825.13	-6.2479	2480	-1.4858			1782	-3.37554	2672	0.279111	1861.77	-5.55949			1880	-1.45293	500.3	0.782774	1023	2.6479	1208.82	8.22312	1817.83	4.09933
		1720	10.7	1110	3.5			1973	-7.75239			1784	2.76505									2721	2.34072	1825.16	-6.82354	2526	2.19375			1809	1.62497	2674	3.55119	1864.58	-2.4869			1899	-2.02736	494.4	-9.38003	1021	2.5367	1699.99	4.30465	1826.52	-5.11545
		1720	7.6	1110	8.5			2990	0.346456			1708	7.52548									2722	-1.03773	1825.58	0.819317	2554.7	-2.81019			1816	-10.3783	2682	-3.55947	1864.95	-5.46865			1930	-0.349056	489.3	-6.96996	1021	1.57264	1803.16	4.8827	1831.72	7.49099
		1720	6	1120	4			1873	-18.9165			594	-16.7284									2723	0.933419	1826.06	-1.02607	2626	2.99442			1829	-5.37753	2689	-1.96881	1869.43	-4.65659			1977	-10.5918	488.4	4.34296	1019	3.22524	1134.18	8.82388	1833.19	8.53961
		1720	5.9	1120	9.2			1870	7.97993			1117	6.81168									2770	3.43213	1829.26	0.00843893	2704	2.04848			1830	2.41552	2706	-9.35761	1877.43	-3.35766					485.4	13.1132	1018	1.87444	2660.02	3.51741	1842.14	-19.4675
		1720	4.1	1140	4.9			1867	3.59869			611	-0.259174									2781	-1.55075	1830.28	0.0179823	2717.17	1.35422			1831	0.641053	2718	-3.59299	1886	-1.06886					479.3	-2.94827	1015	2.78289	1027.35	6.71017	1847.08	-2.33151
		1730	0.5	1140	7.3			2743	3.77405			1448	7.31209									2800	5.16253	1831.64	-6.68766	2732	5.65891			1832	-12.6855	2776	6.78638	1919	-10.3823					478.3	-3.36741	1015	0.0707437	1460.44	2.53427	1848.73	6.91664
		1730	2.1	1150	3.9			2711	-0.963186			578	-9.82613									2808	2.1106	1831.76	-5.10693	2763	6.22602			1832	-10.1213	2787	5.78297	1990.14	3.1948					478	-4.80144	1014	1.22482	1483.14	10.114	1850.11	8.26703
		1730	1.8	1150	5			2859	2.8932			1083	4.44885									2863	1.66518	1832.12	-6.42774	2777.38	1.22931			1837	7.17218	2789	3.96445	1998.25	4.46621					477.5	-6.38591	1013.3	3.19871			1850.46	-4.53264
		1730	6.3	1150	8.4			2749	-0.683356			1453	6.11986									2868	-1.43621	1832.4	3.81463					1848	-13.0469	2790	4.91367	2007.93	6.02556					476.9	-3.23618	1011.9	4.79419			1867.29	-5.70855
		1730	5.3	1160	2.7			2748	0.219093			1886	1.17326									2931	3.64348	1837.86	-10.8155					1854	1.70539	2835	0.025924	2049	-1.79673					476.3	-1.58079	1007	-0.966003			1867.61	-5.73175
		1730	7.4	1190	5.6			2733	-0.311689			584	-11.1236									2978	-0.227402	1845.52	-5.24569					1860	-5.34845	2838	6.15378	2069.86	-1.67631					475.5	-3.27562	1005.3	6.67535			1867.94	6.58605
		1730	0	1210	6.4			1877	-11.672			1472	6.00562									1791.29	-2.6947	1845.54	-6.04137					1869	-4.89896	2942	0.985903	2105.38	5.02741					475.3	-13.3677	1005	0.691098			1873.2	-2.14105
		1740	0.9	1220	4.5			2727	3.53135			1422	9.06196									1809.34	-5.41342	1845.74	-8.74658					1871	-5.00691			2374.01	-1.12501					475	-66.0631	1003	1.30677			1875.48	9.60098
		1740	2.9	1220	6.9			2671	2.77738			1836	-4.61776									1813.6	-11.4383	1846.24	-5.85539					1907	-1.69174			2431.25	-10.7298					473.6	-0.576016	1002.4	10.1558			2453.33	-1.5499
		1740	1.7	1230	6.4			2709	-0.493054			1845	-17.0855									1822.93	-5.16725	1846.61	-5.41362					1910	-7.1895			2526.61	-3.90858					473.6	-2.8559	1000	-0.124165			2591.48	0.940016
		1750	9.7	1250	6			1827	-20.8208			1946	-4.37056									1828.24	-8.89262	1846.64	-1.6185					1917	1.45681			2575.15	0.0668767					473.5	-0.500225	997.4	2.07078			2611.85	2.32468
		1750	9.7	1250	6.7			2812	3.08547			1870	-2.7224									1828.42	-4.52974	1847.63	-3.27107					1919	3.73025			2647.87	1.76044					473.4	-3.58159	997	0.41073			2633.53	0.91589
		1750	2.3	1290	8.8			2565	-6.83693			2720	0.482302									1830.95	-2.56615	1848.77	-6.00554					1920	-11.2042			2681	-3.70432					471.5	1.76805	995	4.13571			2633.73	4.59423
		1750	7.6	1340	4.8							1154	7.88743									1833.68	0.0991173	1849.47	-4.52955					1922	-3.99494			2693.73	-1.55155					471.4	-22.8078	992.21	7.69431			2644.04	20.4634
		1750	5.4	1340	5.1							1016	1.98462									1833.88	-5.77676	1851.89	9.09978					1925	-13.1934			2746	0.985691					470.7	-2.96821	991.29	5.12717			1776.26	-5.60398
		1750	6.3	1350	6.9							2617	3.63887									1834.64	-2.50827	1852.43	-4.23386					1927	-11.2126			2790.03	-1.83827					470.3	-4.44458	986.4	1.80352			1776.9	-0.560317
		1760	4.1	1360	5																	1836.33	-7.81271	1872.32	-3.07148					1930	-6.86397			2848.27	-3.0189					469.7	0.485709	985	-1.64914			1777.37	-4.48659
		1760	0.8	1360	5.2																	1842.56	-5.68313	1874.12	-4.90407					1930	1.17906			2917	1.15208					469.2	-7.48709	983	3.94038			1777.76	-7.97648
		1760	1.6	1370	2.7																	1843.41	4.49732	1913.01	-1.56246					1931	-4.1941			2982.83	2.83323					468.9	-2.20021	980	-1.12177			1779.8	-10.0616
		1760	3.8	1370	5.1																	1844.4	-4.01469	1925.14	-7.38695					1952	-10.4309			3091.27	1.33352					468.5	-1.60205	977	-0.923013			1781.51	-5.72335
		1760	0.5	1370	5.6																	1844.97	-5.63258	1927.29	-3.09194					1953	-10.7424									468.1	-2.42907	974	1.45758			1781.77	-4.83117
		1770	5.3	1370	6.2																	1846.29	-4.53956	1929.01	3.04201					1958	-9.00214									467.5	-2.48139	974	0.834868			1783.37	-0.937625
		1770	2.2	1370	7.5																	1849.98	-7.07875	2066.22	0.361788					1970	-0.538469									466.4	-0.876421	970.3	4.84529			1784	-9.05807
		1770	5.7	1380	0.6																	1853.56	-1.73881	2070.22	-0.411481					1973	-19.4705									465.6	-10.4538	968	-3.00755			1785.79	-0.917851
		1790	3.5	1380	6.8																	1854.82	5.68259	2085.59	2.19386					2045	-3.46315									465.3	-7.20884	968	3.03027			1786.37	-3.50463
		1800	1.9	1380	5.3																	1863.58	-3.93529	2093.72	-1.80694					2067	-5.96676									464.3	-1.79815	966	1.32925			1786.91	-2.52133
		1810	4	1380	7																	1871.96	8.00137	2571.44	3.24266					2104	-14.9951									464.1	-0.995805	964	0.971016			1787.05	-3.41911
		1810	4.5	1390	1.6																	1890.76	-3.50988	2572.01	2.88978					2114	-7.7477									464.1	-10.4231	916.5	2.82619			1787.4	-9.97607
		1810	0.8	1390	4.7																	1894.52	-3.44085	2670.19	-7.28353					2151	-2.68953									463.3	-1.65751	624.4	-2.84814			1788.02	-1.16321
		1820	2.7	1390	4.1																	1896.3	-4.82945	2686.36	6.92308					2279	-11.3422									463.1	-3.98191	617	-0.396725			1788.31	-2.80381
		1820	1.7	1390	0.7																	1905.87	-3.72793	2692.48	4.78174					2318	-8.02866									463.1	-2.2942	604.6	4.55252			1789.4	-10.0788
		1830	0.3	1390	11.3																	1908.42	-2.49034							2328	-6.9715									463	-2.15769	599	-22.6314			1791.44	-4.68325
		1830	1.7	1390	10.8																	1926.32	-0.361189							2347	-2.09337									462.9	-3.42391	598	-2.36445			1795.26	3.16225
		1830	0.5	1390	5.4																	1929.46	-7.759							2363	-9.64965									462.7	5.75846	597.4	-1.08255			1825.07	-9.32523
		1840	2.7	1400	4.2																	1937.24	-14.1223							2556	-1.7607									462.1	3.21694	590.4	-7.76281			1835.83	4.86337
		1840	4.6	1400	4.4																	1937.41	-7.55656							2559	-4.44178									461	-8.4568	585.5	-1.32156			1846.84	-1.73432
		1840	2	1400	6.2																	1974.05	-2.60406							2564	-5.10369									460.2	-6.24703	579.8	3.83519			1857.45	-8.97762
		1850	3.7	1400	4.3																	2073.68	0.436953							2566	3.55987									459.7	-1.46896	574.5	-7.17242			1864.94	7.55766
		1860	4.1	1410	3																	2076.5	-2.69546							2579	0.173177									459.6	-0.586602	564.8	-0.95066			1866.74	-0.856443
		1860	6.3	1410	8.6																	2085.86	-0.659243							2581	-1.51145									459.1	-1.66765	564	-3.05762			1870.58	-3.91924
		1860	0.7	1420	14.5																	2085.91	-1.16188							2699	2.08895									457.5	-3.28085	558.8	-1.88977			2435.55	5.21748
		1870	3.9	1420	3.5																	2089.11	-2.3113							2703	1.35314									455.9	-1.16528	556	-11.981			2586.2	-0.712039
		1870	1.7	1430	3.7																	2100.48	-2.01765							2724	-4.39538									455.1	-0.142262	547	5.02345			2588.92	2.03759
		1870	6.7	1440	2.3																	2317.29	1.67847							2748	-1.01594									454.8	-3.81844	545.5	0.246801			2591.87	2.34817
		1880	4	1440	4.9																	2676.64	-0.876249							2761	2.13293									454.7	-2.62505	532.3	1.76159			2611.92	2.42122
		1880	0	1440	6																	2713.44	-3.55311							2825	-5.55392									454.6	-3.17991	499.5	-6.21238			2613.52	4.72596
		1890	8.7	1440	6.3																	2713.45	0.129158							2926	0.372282									454.1	10.4948	471.4	-8.32146			2633.8	4.03879
		1960	3.4	1450	6.1																	1803.09	-13.315							3361	1.69784									452.9	-2.83759	465	7.42179			2677.91	2.09794
		1970	4.5	1450	6.6																	1814.84	-6.69166																	451.9	-4.93199	463	0.7105			2690.88	-5.58075
		1980	8.7	1450	6.5																	1830.47	-5.11735																	451	-3.21544	461	1.03354			2692.23	-1.40957
		1990	0.7	1460	7.6																	1832.53	-9.52193																	450.9	-0.954035	458.5	-9.6442			2715.58	0.614366
		1990	15.8	1460	5.8																	1833.87	-6.79135																	450	-3.0193	456	1.19652			2717.75	4.19114
		2070	0.4	1460	6.8																	1834.83	-7.42714																	449.9	-6.54013	455	-0.164542
		2090	2.7	1470	3.5																	1835.06	6.32																	449.9	-4.20621	453.2	0.932722
		2130	2.4	1470	0																	1835.11	-8.31411																	449.5	1.23994	453	0.033771
		2240	1.2	1470	6.2																	1837.45	-4.024																	449.3	-4.90507	448.5	1.2894
		2270	0.6	1490	0.9																	1837.69	-7.08084																	448.8	-2.74251	447	2.21048
		2420	0.6	1490	6.5																	1837.86	-6.61362																	447.8	-3.84717	445.3	-2.1192
		2500	0.4	1490	6.8																	1844.1	-5.32529																	446.7	-0.401549	438	3.54043
		2530	3.7	1490	8.1																	1844.33	-7.21266																	446.1	7.18017	438	2.29968
		2530	1.2	1490	7																	1845.77	-4.54334																	445.1	5.12878	436	0.158717
		2570	0.2	1520	9.6																	1845.96	-1.26763																	443.3	-2.43994	434.4	-0.724116
		2590	2.5	1610	5.5																	1846.91	-6.70039																	443.2	-0.838	432.8	-4.84233
		2640	0.3	1620	0.3																	1847.05	-7.93142																	442.3	-3.61048	432	4.81702
		3300	18.9	1630	4.7																	1848.54	-13.4864																	441.4	-3.19357	431.5	-0.598144
		3430	0.6	1630	5																	1856.74	-5.22941																	441	1.32083	428.9	-0.819059
				1650	7																	1862.43	-6.6572																	440	-7.05268	428.6	-1.60195
				1680	0																	1862.5	-1.22505																	439.2	-6.47853	428	-1.84333
				1690	7.2																	1865.83	8.69069																	438.9	0.593828	422.8	2.00281
				1690	7.6																	1883.62	-11.6121																	435	3.42801	421.2	-3.83799
				1690	5.5																	1909.73	-3.39763																	434.9	-6.51933	420.8	3.80877
				1710	7																	1913.02	-8.34292																	433.4	-9.29669	420	4.79786
				1720	1																	1916.58	-5.03101																	432.9	-2.13502	419.5	-0.970237
				1720	0.7																	1917.3	-7.04804																	432.6	-6.03862	419	-0.682381
				1720	9																	1918.1	-3.40485																	432.3	-4.67704	419	-0.633654
				1720	6.3																	1921.71	-4.52507																	429.3	0.455771	418.6	-0.895637
				1720	9.6																	1929.75	-7.70738																	427.3	-2.44923	418.3	7.43218
				1730	7.3																	1932.8	-5.28351																	425.5	-2.08896	418	-0.795153
				1750	5.8																	1935.12	-3.34307																	424.4	-1.91104	418	-2.91024
				1750	8.1																	1938.72	-2.82787																	423.6	-1.05212	417.9	-1.02674
				1760	8.6																	2069.57	-0.0634064																	423.1	0.141148	417.7	-0.814094
				1760	0.8																	2078.65	-0.437803																	422.3	-4.54471	417.3	-1.12293
				1760	1																	2090.55	0.187751																	421	1.15964	417	-3.19281
				1770	0.2																	2091.39	-1.16109																	419.7	1.03954	416.6	-0.675542
				1780	1.5																	2094.77	-2.82306																	418.2	-7.46618	416.5	-1.10798
				1790	3.4																	2664.81	-7.28927																	418.1	-7.85621	413.5	2.23349
				1800	2.3																	2693.62	-0.561075																	407.6	-8.16692	413	0.901019
				1800	0.7																	2696.71	-5.36936																	400.2	0.488885	411	5.85569
				1800	9.1																	1826.38	-6.58936																	391.1	-39.0058	410.8	-2.72344
				1810	2.9																	1827	-10.627																	391.1	-1.00133	410.4	-2.93692
				1810	3.1																	1829.3	-7.69982																	376.5	0.881862	410	-2.31248
				1820	9																	1831.52	-8.08343																			410	3.13619
				1820	8.5																	1831.71	-6.89895																			409.4	-4.73177
				1830	5.7																	1832.08	-7.87009																			409	-15.1678
				1840	8.1																	1842.08	-6.41374																			405.7	0.16464
				1840	9																	1843.63	-6.2991																			405.2	2.57948
				1860	8.8																	1844.64	-5.2493																			404.9	-1.55329
				2030	3.6																	1844.9	-5.07446																			404.3	1.0197
				2450	8																	1844.9	-7.15924																			399	3.6204
				2680	2.6																	1848.74	-3.42732																			399	-2.23945
				2720	1.2																	1849.35	-6.14852																			389.5	4.03917
				2740	3.3																	1850.61	-7.03475																			385.3	1.62549
				2930	2.7																	1852.9	-6.17522																			384	0.371925
				2940	6.7																	1857.33	-2.94255																			380.2	1.36061
				3360	1.7																	1857.37	-5.12322																			378	1.98144
																						1869.84	7.77162																			365.3	3.76878
																						1883.72	-8.2872																			363.1	-4.14633
																						1886.25	-6.02638																			359	-4.98862
																						1904.62	1.23778																			460.9	-10.8608
																						1905.82	-4.22001																			462.9	-12.634
																						1913.08	-5.4042																			464.9	-8.15632
																						1917.01	-2.80003																			472.9	-9.74557
																						1924.46	-7.74142																			485.3	-11.8793
																						1925.42	-3.99275																			2985.5	-8.13153
																						1926.16	-11.5265																			2868.4	1.19337
																						1927.56	-5.56872																			2863.2	2.57239
																						2016.27	-1.16193																			2825.5	1.36042
																						2056.32	0.0512371																			2820.9	2.02504
																						2058.27	-2.55028																			2781.8	-1.33633
																						2070.23	-1.46108																			2762.9	3.26702
																						2071.51	-1.41556																			2755.5	-2.38627
																						2524.26	-2.63738																			2740.3	-5.43593
																						2694.73	4.98291																			2737	1.53383
																						2703.84	-1.77575																			2736.5	1.04426
																						2705.24	-0.284624																			2723	2.21706
																						2721.73	0.153417																			2715.4	0.556308
																						2728.37	-4.42786																			2705.4	-0.0187503
																						2730.93	2.64381																			2697.5	2.97812
																						2738.9	-0.900468																			2568	6.2295
																						2843.13	2.0287																			2562.5	-4.58208
																																										2426	1.65667
																																										2121.6	-6.85152
																																										1880.3	5.17785
																																										1865.2	3.84188
																																										1848.3	3.2732
																																										1843.9	-4.44786
																																										1835.7	-0.318727
																																										1761.1	-12.7525
																																										1749.1	5.20409
																																										1747.9	-2.40014
																																										1655.6	1.66385
																																										1654.5	0.988232
																																										1652.2	3.57083
																																										1650.5	5.75406
																																										1649.3	5.89795
																																										1645.3	7.77572
																																										1643.7	-0.343449
																																										1641.8	-2.37703
																																										1638.1	3.47713
																																										1636.4	-1.08965
																																										1626.5	4.28933
																																										1624.4	3.22462
																																										1616.5	8.06353
																																										1613.4	-4.92821
																																										1565.4	7.25053
																																										1501.2	2.18466
																																										1497.9	2.30363
																																										1495.1	-7.70093
																																										1493.6	-1.18835
																																										1478	-2.02757
																																										1475.1	7.17798
																																										1475.1	6.11837
																																										1466.4	0.814052
																																										1466.2	-3.28684
																																										1461.6	4.08876
																																										1453.7	8.99582
																																										1453.6	10.6176
																																										1447.2	5.15037
																																										1441.7	7.69137
																																										1414.3	8.16095
																																										1402.6	6.6528
																																										1392.4	-2.58605
																																										1382	-2.38533
																																										1374.4	7.531
																																										1369.9	4.41229
																																										1362.7	6.01483
																																										1361.3	5.25201
																																										1348.5	1.40611
																																										1348.3	9.43372
																																										1336.4	7.58928
																																										1335.3	-0.700349
																																										1327.5	6.06009
																																										1321	2.10113
																																										1244.2	1.2529
																																										1229.2	3.17812
																																										1200.8	3.38846
																																										1200.4	3.85715
																																										1199.4	5.88194
																																										1193.7	3.53163
																																										1190.4	3.60366
																																										1181.1	4.94492
																																										1172.4	5.4053
																																										1165.6	4.42546
																																										1164.7	4.18323
																																										1162.9	-5.29129
																																										1160.8	8.85265
																																										1156.8	2.26999
																																										1154.7	2.34444
																																										1154.1	4.2024
																																										1151.3	2.53652
																																										1150.6	1.04638
																																										1144.9	1.92214
																																										1143.8	4.33563
																																										1128.2	7.51515
																																										1123.8	7.37751
																																										1122.5	4.57825
																																										1115.1	1.87678
																																										1113.5	-1.22893
																																										1108.9	-0.119675
																																										1101.4	6.20885
																																										1101.4	3.99526
																																										1097.8	8.41189
																																										1090.8	1.96361
																																										1086.5	2.80418
																																										1085.9	4.79359
																																										1084.1	3.97567
																																										1075.4	1.19747
																																										1073.2	1.9556
																																										1066.1	8.27384
																																										1064.1	5.56372
																																										1055	2.64248
																																										1049.5	8.31095
																																										1046	2.81457
																																										1043.8	2.39369
																																										1042.1	4.71752
																																										1037.4	0.749711
																																										1035.8	4.89156
																																										1034.6	2.57471
																																										1029.1	0.267703
																																										1026.7	5.79778
																																										1024.1	0.559068
																																										1017.9	1.20453
																																										1008.3	2.8125
																																										1005.6	2.55158
																																										1004.9	6.67595
																																										1002.5	3.4125
																																										999.2	2.67613
																																										994.5	1.19751
																																										994.1	0.747717
																																										989.3	-0.405306
																																										977.2	2.8171
																																										969.3	-0.280566
																																										958.9	-0.294786
																																										957.7	0.178365
																																										951.8	1.7252
																																										926	-0.139723
																																										916.2	7.99741
																																										909.6	1.5003
																																										833.1	1.60782
																																										828.2	-1.2096
																																										800.5	-3.97938
																																										722.7	6.09771
																																										633.9	-13.8672
																																										617.6	-4.37494
																																										606.3	-3.30449
																																										603.1	-6.43778
																																										576.5	-1.77562
																																										571.4	0.704601
																																										531.7	0.727326
																																										483.6	-2.4907
																																										479.4	-20.9451
																																										475.4	-9.49598
																																										475.3	-10.1493
																																										475	-4.84618
																																										474.9	-8.66184
																																										469.7	-6.90812
																																										469.1	-3.1172
																																										468.7	-1.23877
																																										464.9	-18.6736
																																										462.2	-11.7537
																																										461.2	-0.902039
																																										460.2	1.19225
																																										458.3	-3.98325
																																										456.9	1.61562
																																										454.9	0.115622
																																										449.7	-1.61802
																																										448.7	5.60686
																																										447.5	-2.18795
																																										447.3	-3.5732
																																										446.7	5.38049
																																										443.6	-3.35728
																																										442.9	4.2822
																																										442	9.12699
																																										437.8	1.34436
																																										437.1	-0.551407
																																										435	-5.19544
																																										433.2	-0.0995613
																																										433	-2.13854
																																										432.9	-5.94632
																																										432.8	-1.04777
																																										431.5	4.79029
																																										428.5	3.97787
																																										428.5	1.02302
																																										428.1	0.329462
																																										427.4	-3.9581
																																										426.1	0.996828
																																										425.3	5.92312
																																										424.8	-4.14752
																																										424.5	5.01568
																																										421.7	5.82285
																																										421.2	-2.0204
																																										413.8	-4.93981
																																										413.1	1.44088
																																										409.2	-3.07184
																																										407.3	-1.99114
																																										404.1	1.1484
																																										399.9	3.91228
																																										393.3	0.824161
																																										391.1	-0.990525
																																										383.8	-1.51119
																																										380.2	0.549024
																																										376.6	-0.401854
																																										359.5	4.51528

## Sheet: 29 Sources for Neo-Tri REFS
Group	Samples	Reference	Formation/Lithology
North Laurentia, Franklinian Basin Devonian strata	Parry1	Anfinson et al., 2012	Parry Islands Formation	Devonian
	Parry2	Anfinson et al., 2012	Parry Islands Formation	Devonian
	Parry3	Anfinson et al., 2012	Parry Islands Formation	Devonian
Scanadanavia Proterozoic basement and Paleozoic strata	107/92	Andersen et al., 2002	Herefoss	Proterozoic
	072396-3	Andersen et al., 2002	Tovdal	Proterozoic
	083096-3	Andersen et al., 2002	Byklom	Proterozoic
	080296-4	Andersen et al., 2002	Rosskreppfjord	Proterozoic
	082996-2	Andersen et al., 2002	Hovring	Proterozoic
	072496-3	Andersen et al., 2002	Saebyggjenut	Proterozoic
	072196-3	Andersen et al., 2002	Bandak	Proterozoic
	072496-2	Andersen et al., 2002	Bessefjell	Proterozoic
	072696-2	Andersen et al., 2002	Otternes	Proterozoic
	083196-1	Andersen et al., 2002	Gunnarstul	Proterozoic
	071996-2	Andersen et al., 2002	Tinn	Proterozoic
	G 9/94	Andersen et al., 2002	Gjeving	Proterozoic
	G16/94	Andersen et al., 2002	Gjeving	Proterozoic
	G2/94	Andersen et al., 2002	Gjeving	Proterozoic
	SA4A	Andersen et al., 2002	Odal	Proterozoic
	TR011/95	Andersen et al., 2002	Tromoy	Proterozoic
	HGG	Andersen et al., 2002	Hisoy	Proterozoic
	TA121/99	Andersen et al., 2002	Snarum	Proterozoic
	03	Andersen et al., 2002	Feiring	Proterozoic
	01	Andersen et al., 2002	Tistedal	Proterozoic
	TA116/99	Andersen et al., 2002	Midtskog	Proterozoic
	TA118/99	Andersen et al., 2002	Bjorkelangen	Proterozoic
	10/97NES	Andersen et al., 2002	Gjerstadvatn	Proterozoic
	8/97JOM	Andersen et al., 2002	Jomas	Proterozoic
	5/97JUS	Andersen et al., 2002	Justoy-Justoy	Proterozoic
	9/97HOM	Andersen et al., 2002	Justoy-Homborsund	Proterozoic
	KL291	Andersen et al., 2002	Heddersvatn Fm.	Proterozoic
	KL78.2	Andersen et al., 2002	Heddersvatn Fm.	Proterozoic
	GA 526	Andersen et al., 2002	Vallar Bru Fm.	Proterozoic
	903 KL-N	Andersen et al., 2002	Brunkeburg Fm	Proterozoic
	TA 99/2 0	Andersen et al., 2002	Heddal Gr	Proterozoic
	830 O13	Andersen et al., 2002	Ofte Fm.	Proterozoic
	TA01-1	Andersen et al., 2007	Vradal pluton	Proterozoic
	TA01-10	Andersen et al., 2007	Vradal pluton	Proterozoic
	TA01-3	Andersen et al., 2007	Granitic gneiss	Proterozoic
	TA01-13	Andersen et al., 2007	Granitic gneiss	Proterozoic
	TA01-14	Andersen et al., 2007	Granodioritic gneiss	Proterozoic
	TA01-12	Andersen et al., 2007	Granitic gneiss	Proterozoic
		Brander et al., 2011		Proterozoic
	NM15A	Andersen et al., 2011	Brumunddal Sandstone	Permian
	MK-2010-2	Kristoffersen et al., 2014	Tanum Formation	Pennsylvanian
	MK-2010-3	Kristoffersen et al., 2014	Tanum Formation	Pennsylvanian
	MK-2010-4	Kristoffersen et al., 2014	Tanum Formation	Pennsylvanian
	MK-2010-5	Kristoffersen et al., 2014	Tanum Formation	Pennsylvanian
	MK-2010-7	Kristoffersen et al., 2014	Tanum Formation	Pennsylvanian
	MK12-1	Kristoffersen et al., 2014	Holmestrand Formation	Silurian
	R2010-2	Kristoffersen et al., 2014	Sundvollen Formation	Silurian
	R2010-6	Kristoffersen et al., 2014	Stubdal Formation	Silurian
	R2010-8	Kristoffersen et al., 2014	Stubdal Formation	Silurian
	AA11-41	Kristoffersen et al., 2014	Langoyene Formation	Ordovician
	LEA08-28	Augland et al., 2012	Tolladalen gabbro	Proterozoic
	LEA0-9	Augland et al., 2012	Hogtind granite	Proterozoic
	LEA08-20	Augland et al., 2012	Marvold diorite	Proterozoic
	LEA08-22	Augland et al., 2012	Harefjellet diorite	Proterozoic
	LEA09-16	Augland et al., 2012	Harefjellet granite	Proterozoic
	LEA08-25	Augland et al., 2012	Tverrvika dioriate	Proterozoic
	LES08-21	Augland et al., 2012	Marvold granite	Proterozoic
	LES08-27	Augland et al., 2012	Tvervika granitic pegmatite	Proterozoic
	LES06-71	Augland et al., 2012	Hurry Inlet composite poluton	Proterozoic
	PIM05-Li2	Augland et al., 2012	Hurry Inlet composite poluton	Proterozoic
	AA12-1	Andresen et al., 2014	Dividal Group	Neoproterozoic-Cambrian
	AA12-2	Andresen et al., 2014	Dividal Group	Neoproterozoic-Cambrian
Northeast Laurentia Mesozoic strata, Sverdrup and Wandel Sea basins	C82218	Rohr et al., 2010	Lower Cretacteous Isachsen Formation	Lower Cretaceous
	C072382	Rohr et al., 2010	Lower Cretacteous Isachsen Formation	Lower Cretaceous
	C86116	Rohr et al., 2010	Lower Cretacteous Isachsen Formation	Lower Cretaceous
	C100614	Rohr et al., 2010	Lower Cretacteous Isachsen Formation	Lower Cretaceous
	C100629	Rohr et al., 2010	Lower Cretacteous Isachsen Formation	Lower Cretaceous
	113-113	Rohr et al., 2008	Lichen Ryg Formation	Lower Cretaceous
	113-144	Rohr et al., 2008	Ladegardsaen Formation, middle unit	Upper Jurassic
	113-177	Rohr et al., 2008	Ladegardsaen Formation, upper unit	Lower Cretaceous
	113-215	Rohr et al., 2008	Ladegardsaen Formation, lower unit	Upper Jurassic
	113-011	Rohr et al., 2008	Kuglelejet Formation	Upper Jurassic
	113-012	Rohr et al., 2008	Kuglelejet Formation	Upper Jurassic
Cretaceous strata, northeast Canada and north Greenland (Sverdrup and Wandel Sea basins, >1.7 Ga)	As above
Caledonian granites, UK		Appleby et al., 2010	Kemnary Granite	Ordovician
		Appleby et al., 2010	Cove Granite	Ordovician
		Appleby et al., 2010	Nigg Bay Granit	Ordovician
	MJF 3/95-39A	Flowerdew et al., 2009	Ballygawley Tonalite	Ordovician
	MJF 5/97-16	Flowerdew et al., 2009	BallyGgawley Granite	Ordovician
	MJF 10/94-2A	Flowerdew et al., 2009	Granite pegmatite	Ordovician
	MJF 5/97-29	Flowerdew et al., 2009	Granite pegmatite	Ordovician
	SG2	Flowerdew et al., 2009	Leucosome-Slishwood Gap-Slishwood Division	Ordovician
	TCI-10	Flowerdew et al., 2009	Leucosome-Hill-Tyrone Central Inlier	Ordovician
Yavapai-Mazatzal Proterozoic basement	B-81-85	Bickford et al., 2008	Dubois Succession Rhyolite	Proterozoic
	B-83-1	Bickford et al., 2008	Granite of South Beaver Creek	Proterozoic
	B-81-71	Bickford et al., 2008	Powderhorn Granite	Proterozoic
	B-81-40	Bickford et al., 2008	Cochetopa Metarhyolite	Proterozoic
	K12-96.2	Holland et al., 2015	Boucher Pluton	Proterozoic
	K12-91.5	Holland et al., 2015	Trinity Creek Block	Proterozoic
	K12-90.5	Holland et al., 2015	Horn Creek Pluton	Proterozoic
	K12-85.3	Holland et al., 2015	Zoroaster Pluton	Proterozoic
	K12-81	Holland et al., 2015	Grapevine Camp Pluton	v
Mojave province Proterozoic basement	PCyn	Wooden et al., 2013	Jotunite pegmatite	Proterozoic
	SGS	Wooden et al., 2013	Syenite	Proterozoic
	SGA65	Wooden et al., 2013	Jotunite	Proterozoic
	VP10	Wooden et al., 2013	Orthogneiss	Proterozoic
	418-19	Wooden et al., 2013	Orthogneiss	Proterozoic
	JW84-4	Wooden et al., 2013	Granite	Proterozoic
	EPZ2	Wooden et al., 2013	Quartz syenite	Proterozoic
	SGZ	Wooden et al., 2013	Granite	Proterozoic
	JW89-122	Wooden et al., 2013	Granite	Proterozoic
	JW84-13	Wooden et al., 2013	Granite	Proterozoic
	JW84-15	Wooden et al., 2013	Granite	Proterozoic
	1168	Wooden et al., 2013	Granite	Proterozoic
	JW149	Wooden et al., 2013	Granitic gneiss	Proterozoic
	JW234	Wooden et al., 2013	Augen gneiss	Proterozoic
	JW85-40	Wooden et al., 2013	Granodiorite gneiss	Proterozoic
	JW86-69	Wooden et al., 2013	Granite	Proterozoic
	JW87-85	Wooden et al., 2013	Granodiorite	Proterozoic
	JW87-96	Wooden et al., 2013	Granodiorite	Proterozoic
	JW87-102	Wooden et al., 2013	Diorite	Proterozoic
	JW87-97	Wooden et al., 2013	Augen gneiss	Proterozoic
	418-7	Wooden et al., 2013	Augen gneiss	Proterozoic
	JW152	Wooden et al., 2013	Quartzofeldspathic gneiss	Proterozoic
	JW86-77	Wooden et al., 2013	Granodiorite gneiss	Proterozoic
	JW87-101	Wooden et al., 2013	Augen gneiss	Proterozoic
	JW87-94	Wooden et al., 2013	Granitic gneiss	Proterozoic
	JW84-21	Wooden et al., 2013	Augen gneiss	Proterozoic
	JW87-95	Wooden et al., 2013	Tonalitic gneiss	Proterozoic
	JW91-172	Wooden et al., 2013	Trondhjemitic gneiss	Proterozoic
	JW147	Wooden et al., 2013	Granitic gneiss	Proterozoic
	JW232	Wooden et al., 2013	Augen gneiss	Proterozoic
	JW98-330	Wooden et al., 2013	Quartzite	Proterozoic
	JW86-79	Wooden et al., 2013	Garnet gneiss	Proterozoic
	K06-238	Holland et al., 2015	238-Mile	Proterozoic
	K06-228	Holland et al., 2015	228-Mile	Proterozoic
	K06-245	Holland et al., 2015	245-Mile	Proterozoic
	K05-100.5	Holland et al., 2015	Tuna Pluton	Proterozoic
	K05-107	Holland et al., 2015	Ruby pluton	Proterozoic
South Laurentia 1.4 Ga basement	IACK-001	Goodge and Vervoort, 2008	Peterson (granite)	Proterozoic
	ILST-003	Goodge and Vervoort, 2008	UPH-3 (granite)	Proterozoic
	KSMS-044	Goodge and Vervoort, 2008	Vermilion (granite)	Proterozoic
	NBFN-001	Goodge and Vervoort, 2008	LeMaster (granite)	Proterozoic
	MI 81–12	Goodge and Vervoort, 2008	Blair 2–24 (granite)	Proterozoic
	VS70-91a	Goodge and Vervoort, 2008	Wolf River granite	Proterozoic
	KSDG-3	Goodge and Vervoort, 2008	test (granite)	Proterozoic
	TISH	Goodge and Vervoort, 2008	Tishomingo granite	Proterozoic
	KSMI 4	Goodge and Vervoort, 2008	test (granite)	Proterozoic
	MOMC2	Goodge and Vervoort, 2008	AMAX, HC-1 (granite)	Proterozoic
	SC-2	Goodge and Vervoort, 2008	San Isabel monzogranite	Proterozoic
	SD-2	Goodge and Vervoort, 2008	San Isabel monzogranite	Proterozoic
	RV-1C	Goodge and Vervoort, 2008	Oak Creek monzogranite	Proterozoic
	CO-7	Goodge and Vervoort, 2008	Gulch monzogranite	Proterozoic
	CO-9	Goodge and Vervoort, 2008	monzogranite	Proterozoic
	NOB-1	Goodge and Vervoort, 2008	sill in Hardscrabble Creek	Proterozoic
	KCAZ98-10	Goodge and Vervoort, 2008	Long Mountain	Proterozoic
	BW-1	Goodge and Vervoort, 2008	Boriana Canyon	Proterozoic
	JW-10	Goodge and Vervoort, 2008	Mafic granodiorite	Proterozoic
	JW-13	Goodge and Vervoort, 2008	Granite of Olea Ranch	Proterozoic
	JW-15	Goodge and Vervoort, 2008	Granite of Olea Ranch	Proterozoic
	1164	Goodge and Vervoort, 2008	Signal granite	Proterozoic
	1168	Goodge and Vervoort, 2008	Signal granite	Proterozoic
	A-151a	Goodge and Vervoort, 2008	Granite of Joshua Tree Parkway	Proterozoic
	A-153	Goodge and Vervoort, 2008	Granite of Grayback Mountain	Proterozoic
	B565	Goodge and Vervoort, 2008	Buckskin Mountains Granite	Proterozoic
	JW-122	Goodge and Vervoort, 2008	Yarnell granodiorite	Proterozoic
	JW-4	Goodge and Vervoort, 2008	Turtle Mountains pluton	Proterozoic
	BSPZ-1	Goodge and Vervoort, 2008	Barrel Springs pluton,	Proterozoic
	EPZ-1	Goodge and Vervoort, 2008	Barrel Springs pluton,	Proterozoic
	EPZ-2	Goodge and Vervoort, 2008	Barrel Springs pluton,	Proterozoic
	SGZ-1	Goodge and Vervoort, 2008	Piute Mountains Piute Mountains pluton	Proterozoic
	JW-100	Goodge and Vervoort, 2008	dike in Piute Mountains	Proterozoic
Eastern Laurentia Appalachian foreland strata	KY-18-CB	Thomas et al., 2017	Corbin Sandstone	Lower Pennsylvanian
	KY-19-PR7	Thomas et al., 2017	Princess 7 Coal	Middle Pennsylvanian
	KY-21-SG	Thomas et al., 2017	Pennington Formation	Upper Mississippian
	OH-1-SS	Thomas et al., 2017	Pottsville Formation	Lower Pennsylvanian
	VA-1-GN	Thomas et al., 2017	Grundy-Norton Interval	Lower Pennsylvanian
	WV-1-PR	Thomas et al., 2017	Greene Formation	Permian
	DP-1	Mueller et al., 20018	Coastal sand	Pleistocene
Eastern Laurentia Appalachian foreland strata (<900 Ma)	As above
Eastern Laurentia Appalachian foreland strata (>900 Ma)	As above
Eastern Laurentia Grenville basement	m	Bickford et al., 2010	Bloomingdale mangerite	Proterozoic
	o	Bickford et al., 2010	Moodys mangerite south of Tupper Lake	Proterozoic
	f	Bickford et al., 2010	Schroon Lake charnockite	Proterozoic
	v	Bickford et al., 2010	Northern Marcy anorthosite massif at Middle Saranac Lake	Proterozoic
	u	Bickford et al., 2010	Southern Marcy anorthosite massif	Proterozoic
	w	Bickford et al., 2010	Northwest Marcy anorthosite massif	Proterozoic
	x	Bickford et al., 2010	Eastern Marcy anorthosite massif and ferrodiorite layer	Proterozoic
	j	Bickford et al., 2010	pegmatitic anorthosite and pyroxenite dike at Jay	Proterozoic
	c	Bickford et al., 2010	Oregon Dome anorthosite	Proterozoic
	h	Bickford et al., 2010	coronitic metagabbro	Proterozoic
Western Laurentia Upper Belt Supergroup	Mt. Shields Formation	Stewart et al., 2010	Mesoproterozoic strata, Idaho and Wyoming	Proterozoic
	Mt. Shields Formation	Stewart et al., 2010	Mesoproterozoic strata, Idaho and Wyoming	Proterozoic
	Gunsight Formation	Stewart et al., 2010	Mesoproterozoic strata, Idaho and Wyoming	Proterozoic
	Bonner Formation	Stewart et al., 2010	Mesoproterozoic strata, Idaho and Wyoming	Proterozoic
	Hoodoo Quartzite	Stewart et al., 2010	Mesoproterozoic strata, Idaho and Wyoming	Proterozoic
	Bonner Formation	Stewart et al., 2010	Mesoproterozoic strata, Idaho and Wyoming	Proterozoic
	Yellowjacket Formation	Stewart et al., 2010	Mesoproterozoic strata, Idaho and Wyoming	Proterozoic
Eastern Laurentian Pre-middle Ordovician strata, Newfoundland	10Ca71	Willner et al., 2014	coarse-grained mature quartz arenite	Orodvician
E Laurentia Iapetus Suture, Newfoundland	10Ca131	Willner et al., 2014	immature, red sandstone	Silurian
	10Ca162	Willner et al., 2014	immature, coarse-grained sandstone from upper Ordovician Point Leamington Formation	Upper Ordovician
	10Ca161	Willner et al., 2014	Immature sandstone of middle Ordovician Moores Cove Formation	Middle Ordovician
Gander terrane Paleozoic basement, Newfoundland	10Ca205	Willner et al., 2014	cordierite-andalusite mica schist	Early Paleozoic (likely Ordovician)
Avalonia terrane Pre-middle Ordovician strata, Nova Scotia and Newfoundland	au06b5	Pollock et al., 2015	Mall Bay Formation	Proterozoic
	au05a4	Pollock et al., 2015	Briscal Formation	Proterozoic
	fe19a4	Pollock et al., 2015	Crown Hill Formation	Proterozoic
	au04a11	Pollock et al., 2015	Cuckold Formation, Cape Spear Member	Proterozoic
	au06c5	Pollock et al., 2015	Random Formation	Cambrian
	au05b3	Pollock et al., 2015	Redmans Formation	Ordovician
	10Ca18	Willner et al., 2013	Early Cambrian grey quartzite	Cambrian
	10Ca20	Willner et al., 2013	Lower Cambrian Bengal Road Formation	Cambrian
	10Ca29	Willner et al., 2013	Kelvin Glen Group	Cambrian
	10Ca36	Willner et al., 2013	Stirling Group	Proterozoic
	ACO-12-52A	Henderson et al., 2016	Gamble Brook Formation	Proterozoic
	ACO-12-52b	Henderson et al., 2016	Gamble Brook Formation	Proterozoic
	ACO-12-29b	Henderson et al., 2016	Livingstone Cove Formation	Proterozoic
	ACO-12-50	Henderson et al., 2016	James River Formation	Proterozoic
	ACO-12-38	Henderson et al., 2016	Malignant Cove Formation	Cambrian
	ACO-12-48	Henderson et al., 2016	MacKinnons Brook Formation	Ordovician
	ACO-12-49	Henderson et al., 2016	Black John Formation	Cambrian
	ACO-13-22	Henderson et al., 2016	Ferrona Formation	Ordovician
	ACO-12-40	Henderson et al., 2016	Redmans Formation	Ordovician
Avalonia terrane Proterozoic basement, Nova Scotia and Newfoundland	10Ca43C/D	Willner et a., 2013	granitoid pebbles from the Point Michaud conglomerate	Proterozoic
	jl08c03	Pollock et al., 2015	Stirling Group	Proterozoic
	jl07a05	Pollock et al., 2015	Pringle Mountain Group	Proterozoic
	jl08b04	Pollock et al., 2015	Chisholm Brook Intrusive Suite	Proterozoic
	jl07c04	Pollock et al., 2015	Huntington Mountain Pluton	Proterozoic
	jl07b04	Pollock et al., 2015	Fourchu Group	Proterozoic
	12mr27b04	Pollock et al., 2015	Holyrood Intrusive Suite	Proterozoic
Pearya Terrane Proterozoic basement, Ellesmere Island	08-132	Malone, 2012	Quartzite	Cambrian
	08-136	Malone, 2012	Quartzite	Proterozoic
	08-157	Malone, 2012	Mylonitic greywacke	Proterozoic
	08-177	Malone, 2012	Lithic biotite quart mylonite	Proterozoic
	08-189	Malone, 2012	Meta-greywacke	Proterozoic
	08-195	Malone, 2012	Quartzite	Proterozoic
	08-196	Malone, 2012	Quartzite	Proterozoic
Upper Ordovician strata, Ellesmere Island	08-174	Malone, 2012	Cape Discovery Formation	Late Ordovician
	08-163	Malone, 2012	Taconite Formation	Late Ordovician
	08-161	Malone, 2012	Taconite Formation	Late Ordovician
Upper Ordovician/Lower Silurian - middle Mississippian Ellesmere Island	08-208	Malone, 2012	Cranstone Formation	Late Ordovician/early Silurian
	08-209	Malone, 2012	Cranstone Formation	Late Ordovician/early Silurian
	08-164	Malone, 2012	Danish River Formation	Early Silurian
	08-188	Malone, 2012	Danish River Formation	Early Silurian
	08-147	Malone, 2012	Okse Bay Formation	Late Devonian
	08-142	Malone, 2012	Emma Fjord Formatin	Middle Mississippian
Upper Mississippian-Pennsylvanian, Ellesmere Island	PB4	Malone, 2012	Borup	Late Mississippian
	PB5	Malone, 2012	Borup	Late Mississippian
	PB6	Malone, 2012	Nansen-Borup	Pennsylvanian-Permian
	08-145	Malone, 2012	Otto Fjord	Pennsylvanian
	08-117	Malone, 2012	Canyon Fjord	Pennsylvanian
	08-169	Malone, 2012	Canyon Fjord	Pennsylvanian
Proterozoic basement, Defiance Uplift Arizona	BJ-002-02	Doe et al., 2013	Upper Blackjack Formation	Proterozoic
	BL-MFD-08	Doe et al., 2013	Lower Blackjack Formation	Proterozoic
	KEKFEFQZTT-1	Doe et al., 2013	Lower Defiance Quartzite	Proterozoic
Eastern Laurentia Proterozoic-Paleozoic basement and clasts from glacial tillites	NAZ15-01	Zirakparvar, NA et al., 2017	Central Park Schist	Devonian
	NAZ15-04	Zirakparvar, NA et al., 2017	Bedford Complex	Ordovician
	NAZ15-05	Zirakparvar, NA et al., 2017	Bedford Complex	Ordovician
	NAZ15-07	Zirakparvar, NA et al., 2017	Peach Lake Complex	Ordovician
	NAZ15-10	Zirakparvar, NA et al., 2017	Beemervill Complex	Late Ordovician
	NAZ15-12	Zirakparvar, NA et al., 2017	Losee Suite	Proterozoic
	NAZ15-13	Zirakparvar, NA et al., 2017	Losee Suite	Proterozoic
	NAZ15-14	Zirakparvar, NA et al., 2017	Losee Suite	Proterozoic
	LW03	Zirakparvar, NA et al., 2017	Wisconsinian Rahway Till	Pleistocene
	PI01	Zirakparvar, NA et al., 2017	Port Murray Formation	Pleistocene
East Greenland Caledonide granites	S23	Rehnstrom, 2010	Korridoren Granodiorite	Ordovician-Silurian
	S14	Rehnstrom, 2010	Bregepynt Monzonite	Ordovician-Silurian
	S24	Rehnstrom, 2010	Nordvestrfjord Granodiorite	Ordovician-Silurian
Northeast Laurentia Proterozoic strata Labrador	9713-CL198A-03	LaFlamme et al., 2013	Aillik Group	Proterozoic
	9714-CL199A-03	LaFlamme et al., 2013	Aillik Group	Proterozoic
	9715-CL452A-03	LaFlamme et al., 2013	Aillik Group	Proterozoic
	9716-CL453A-03	LaFlamme et al., 2013	Aillik Group	Proterozoic
	9717-CL458A-03	LaFlamme et al., 2013	Aillik Group	Proterozoic
Peri-Gondwanan Proterozoic basement, Mexico	OAX0701	Weber et al., 2010	Southern Oaxacan Complex	Proterozoic
	OAX0704	Weber et al., 2010	Southern Oaxacan Complex	Proterozoic
	OAX0705	Weber et al., 2010	Southern Oaxacan Complex	Proterozoic
	G23	Weber et al., 2010	Guichicovi Complex	Proterozoic
	G18-1	Weber et al., 2010	Guichicovi Complex	Proterozoic
	NOV-7-85	Weber et al., 2010	Novillo Gneiss	Proterozoic
	MOL-2-86	Weber et al., 2010	Huiznopala Gneiss	Proterozoic
	V-198	Weber et al., 2010	Huiznopala Gneiss	Proterozoic
Gondwanan Permo-Triassic basement, Ecuador-Colombia	11RC14	Cochrane, 2013	Pidras Unit	Triassic
	11RC14	Cochrane, 2013	Monte Olivo Unit	Triassic
	11RC03	Cochrane, 2013	Agoyan Formation	Triassic
	10RC71	Cochrane, 2013	Cajamarca Complex	Triassic
	10RC69	Cochrane, 2013	Cajamarca Complex	Permian
	10RC53	Cochrane, 2013	Cajamarca Complex	Triassic
	10RC43	Cochrane, 2013	Cajamarca Complex	Triassic
	10RC41	Cochrane, 2013	Cajamarca Complex	Triassic
	10RC28	Cochrane, 2013	Chinchina Stock	Triassic
	10RC04	Cochrane, 2013	Cajamarca Complex	Permian
	09RC53	Cochrane, 2013	Tres Lagunas Granite	Triassic
	09RC25	Cochrane, 2013	Tres Lagunas Granite	Triassic
	DV82	Cochrane, 2013	Cajamarca Complex	Permian
	DV65	Cochrane, 2013	Cajamarca Complex	Triassic
	10RC42	Cochrane, 2013	Cajamarca Complex	Triassic
	10RC40	Cochrane, 2013	Cajamarca Complex	Triassic
	10RC39A	Cochrane, 2013	Santa Elena Unit	Triassic
	09RC56	Cochrane, 2013	Tres Lagunas Granite	Triassic
	09RC42	Cochrane, 2013	Sabanilla Unit	Triassic
	09RC40	Cochrane, 2013	Moromoro Unit	Triassic
	09RC31	Cochrane, 2013	Tres Lagunas Granite	Triassic
Southwest Laurentia Permo-Triassic plutons, California	LCP-2	Cecil et al., 2019	El Paso Mtns	Triassic
	CCQM	Cecil et al., 2019	El Paso Mtns	Permian
	GF	Cecil et al., 2019	El Paso Mtns	Permian
	LCP-1	Cecil et al., 2019	El Paso Mtns	Triassic
	MCP-1	Cecil et al., 2019	El Paso Mtns	Permian
	MCPF	Cecil et al., 2019	El Paso Mtns	Permian
	PWM-1CA	Cecil et al., 2019	El Paso Mtns	Permian
	TRBS-1	Cecil et al., 2019	El Paso Mtns	Triassic
	TRBS-2	Cecil et al., 2019	El Paso Mtns	Triassic
	LM-1	Cecil et al., 2019	Lane Mtns	Permian
	FPG-1CA	Cecil et al., 2019	Fremont Peak	Permian

## Sheet: 29 Sources for Neo-Tri AGE_HF
North Laurentia, Franklinian Basin Devonian strata		Scanadanavia Proterozoic basement and Paleozoic strata		Northeast Laurentia Mesozoic strata, Sverdrup and Wandel Sea basins		Cretaceous strata, northeast Canada and north Greenland (Sverdrup and Wandel Sea basins, >1.7 Ga)		Caledonian granites, UK		Yavapai-Mazatzal Proterozoic basement		Mojave province Proterozoic basement		South Laurentia 1.4 Ga basement		Eastern Laurentia Appalachian foreland strata		Eastern Laurentia Appalachian foreland strata (<900 Ma)		Eastern Laurentia Appalachian foreland strata (>900 Ma)		Eastern Laurentia Grenville basement		Western Laurentia Upper Belt Supergroup		Eastern Laurentian Pre-middle Ordovician strata, Newfoundland		E Laurentia Iapetus Suture, Newfoundland		Gander terrane Paleozoic basement, Newfoundland		Avalonia terrane Pre-middle Ordovician strata, Nova Scotia and Newfoundland		Avalonia terrane Proterozoic basement, Nova Scotia and Newfoundland		Pearya Terrane Proterozoic basement, Ellesmere Island		Upper Ordovician strata, Ellesmere Island		Upper Ordovician/Lower Silurian - middle Mississippian Ellesmere Island		Upper Mississippian-Pennsylvanian, Ellesmere Island		Proterozoic basement, Defiance Uplift Arizona		Eastern Laurentia Proterozoic-Paleozoic basement and clasts from glacial tillites		East Greenland Caledonide granites
383	5.48	1.04	4.1	3713	0.983766	3713	0.983766	457	-12.9842	1664	5.11	1180	1.9	1410	-1.35	330	-5.45417	298	-2.2	921.7	-0.643069	1148	4.5	1388	0.84	1107.28	2.60247	493.034	-11.3682	1637.47	-2.62993	1651	3.8	646	-4.7	1640	1.0626	456	-0.765869	468	3.85747	1607	-0.781724	1563	7.07621	456.3	2.46271	451	-5.30341
383	8.11	262	6.37501	3700	-3.1	3700	-3.1	457	-9.90172	1700	3.7	1180	2.7	1416	-0.31	359.5	-1.01746	311	-2.7	934.9	4.73363	1148	4.9	1402	-7.9	1088.41	3.17447	992.96	2.47033	590.093	-9.41479	607	7	681	-3.7	1390	8.96419	461	-1.61187	1136	7.81101	1124	2.16294	1558	7.24748	760	-0.857057	451	-5.05591
404	8.2	277	1.31772	3698	-1.4	3698	-1.4	457	-16.1034	1714	3.68	1180	2.7	1404	-0.28	364.8	-3.63537	318	1.2	936.1	-0.15191	1148	5.5	1424	-8.43	1608.32	-1.80034	453.205	10.6715	636.115	1.7929	639	10.1	668	1.3	1647	5.54649	462	0.622236	1064	5.60202	2595	4.73147	1559	8.82612	674	-29.1794	462	-4.85813
422	5.75	279	3.92165	3669	-0.8	3669	-0.8	457	-10.0895	1723	9.43	1180	5.2	1472	-0.06	367.6	2.68175	324	-4.2	937	3.49597	1148	6.1	1425	1.24	1602.04	-1.21967	458.17	-0.600506	1877.27	-2.69771	585	10.2	656	-4.6	1200	1.22438	456	-0.368929	1725	-5.69586	1875	7.25705	1471	7.18824	807	-3.06244	458	-5.2514
427	3.65	280	3.68489	3649	-1.6	3649	-1.6	457	-26.7137	1742	9.25	1180	7.8	1410	0.07	370.3	0.580994	349	-2.3	940.1	2.08045	1148	6.3	1429	-7	1015.65	-0.705801	417.83	-5.30665	2691.4	-2.71929	588	9.4	610	-9.5	1114	9.44353	466	-2.98564	1020	-2.45641	1834	-8.19424	1802	0.376409	503.5	3.6048	458	-5.10403
428	0.64	282	6.5628	3638	-1.1	3638	-1.1	457	-9.04212	1750	4.18	1180	1.1	1427	0.12	372.2	0.219288	351	2.3	949.5	2.5469	1148	6.8	1432	-7.76	945.321	0.238597	484.957	-7.86718	1533.51	0.965869	616	10.7	647	-5.3	1459	9.49822	477	1.27231	452	-0.16533	2606	1.78626	1469	7.35396	445.4	-1.4772	455	-5.73264
438	3.18	283	6.29165	3578	-2.1631	3578	-2.1631	457	-13.151	1750	3.73	1180	8.3	1421	0.12	376.2	1.69935	354	1	949.7	8.88738	1150	3.3	1445	4.74	1047.03	1.25352	798.983	-3.73443	1905.96	-10.0753	639	8	673	-4.2	1066	2.40013	471	1.44418	1106	7.79895	2501	0.322335	1624	10.6693	442.5	-2.15189	455	-5.20134
439	-2.02	284	4.50848	3547	-4.7	3547	-4.7	457	-17.9629	1750	2.94	1180	3.9	1418	0.14	378	3.5838	355	-0.9	952.6	-4.2426	1150	5.8	1467	-4.66	1078.31	2.34216	434.894	-3.11229	564.787	-4.84396	634	6.6	906	-4.5	1430	3.52527	465	-0.466015	967	-1.82654	2317	-6.23377	1746	8.28477	464.2	-1.26157	459	-6.42492
441	5.72	288	3.06679	3510	-2.96485	3510	-2.96485	457	-11.7932	1750	2.22	1180	1.3	1400	0.37	378.6	1.37612	358	-6.7	963.4	1.03627	1150	6.2	1673	1.3	1057.24	-0.784466	424.934	-9.88537	2082.71	5.83331	565	7.3	727	-3.3	1189	4.25622	459	-1.20766	965	0.0737869	1059	-2.26052	1623	7.32194	476.8	-1.75261	459	-6.3178
450	3.35	293	2.06555	3497	-3.70459	3497	-3.70459	457	-29.3198	1760	3.15	1180	0.5	1390	0.63	380.9	3.96718	360	-1.4	963.7	0.425233	1150	6.3	1677	-0.85	1029.75	2.42521	2065.94	-0.873859	1223.18	1.68485	1239	4.1	676	-3.2	1044	-31.2285	458	-0.605875	2683	4.81395	1858	0.882568	1586	6.1075	446.1	-0.960431	459	-6.601
519	-1.7	308	5.33532	3484	-4.27991	3484	-4.27991	457	-11.6615	1760	8.91	1180	3.6	1339	0.8	382.2	1.69268	368	-13.2	969.4	7.77646	1150	6.9	1687	3.51	1033.57	2.3853	1040.59	1.8532	2083.01	-0.630267	601	9.8	684	-3.8	1296	10.9381	469	-0.461719	962	0.455172	1846	-7.64166	1630	4.40056	419.5	1.78322	456	-6.06223
523	6.25	313	-3.76672	3449	-4.22507	3449	-4.22507	457	-11.4049	1760	9.15	1180	6.8	1410	0.87	385.4	-0.950004	369	-0.5	969.7	4.49566	1150	7.4	1692	1.37	1325.18	7.91754	450.645	-7.9388	504.76	-7.45192	623	11	707	-1.7	1455	5.3225	475	-5.89741	1656	4.17315	2828	2.5939	1598	6.35865	456.9	2.33886	456	-5.39115
526	3.82	316	1.57621	3409	47.6	3409	47.6	457	-13.6481	1760	9.58	1190	6.1	1433	0.96	388.3	2.31966	371	-6.2	969.8	11.9021	1150	7.9	1693	-1.18	1494.77	2.37034	451.513	11.6141	1512.63	-0.578628	593	0.5	688	-4.8	1306	4.11564	474	-5.4279	1044	7.48073	1835	-18.7342	3257	0.971367	469.1	2.71125	456	-6.27614
527	4.48	324	1.94657	3395	-11.4	3395	-11.4	457	-14.1266	1760	8.96	1190	2	1418	1.53	393.3	-7.70287	375	-2.6	970.1	-8.017	1150	9.2	1694	1.37	1602.79	2.90282	483.825	-7.57616	1537.23	-0.268863	633	7.5	770	-3.1	1217	-0.528587	467	1.25316	975	-2.11106	1806	-7.25033	1626	8.72959	433.6	1.54619	456	-6.27614
530	3.88	328	-1.81332	3385	-2.4	3385	-2.4	457	-11.6358	1760	10.05	1190	4.6	1420	1.72	397.9	-0.317749	382	-10.2	975.4	6.51626	1155	5.5	1694	1.94	1660.43	-0.179654	449.707	7.74442	1551.99	1.53101	602	8.5	666	-4.6	1130	3.25975	461	-1.00587	978	-2.53515	655	1.46913	1632	7.69821	509.8	2.62097	456	-5.42625
533	3.94	330	-1.31952	3383	-6.5	3383	-6.5	457	-24.8452	1760	10.81	1190	3.1	1465	1.95	399.7	2.38106	388	-4.6	988.4	4.723	1155	5.4	1695	-2.03	1058.93	5.12904	477.031	-8.84844	2061.38	-0.0298562	636	10.6	2789	-1.6	1353	5.47576	468	-0.293057	982	-0.810419	1944	-8.83131	1473	7.72109	678	0.127751	456	-6.06223
535	5.9	331	-4.12395	3374	-4.4	3374	-4.4	457	-17.3382	1760	10.37	1190	4.3	1361	2	404.9	-0.342113	389	4.2	995.1	4.6228	1155	5.6	1695	-0.75	1056.42	0.512374	500.517	-7.90047	585.062	-7.17235	616	4.7	622	-4.2	1192	-10.2077	547	0.194547	1637	-2.98913	1015	-6.92019	1801	6.75937	1059	10.1559	456	-5.39115
536	0.53	332	-0.703212	3341	-9.4	3341	-9.4	458	-12.5654	1760	9.63	1190	0.6	1418	2.59	411.3	5.15482	404	1.3	995.7	2.23094	1155	5.7	1695	1.79	1339.53	1.44366	505.518	-4.09085	628.073	6.44578	600	10.9	1220	2.7	1062	2.79054	460	0.223759	1725	1.71497	653	-1.31213	1629	5.91885	558.6	-3.8139	456	-5.70975
541	2.74	333	-1.77338	3281	1.7	3281	1.7	458	-10.6093	1760	12.18	1190	10.6	1414	3.31	412.5	3.14345	407	4.9	996.4	2.82821	1155	5.8	1696	-1.11	1329.15	1.63823	441.053	-0.788419	1226.72	1.07091	612	4.7	694	-3.7	1332	2.96847	478	-1.6625	1104	3.60348	1366	5.32298	1470	8.37565	597	-0.373465	460	-6.27138
541	3.88	335	-3.60884	3274	2.5	3274	2.5	458	-12.9344	1760	8.71	1190	4.4	1414	3.45	412.6	0.461371	409	0.5	1000.3	2.7107	1155	5.9	1696	0.09	990.442	-5.04634	492.402	-5.70541	523.169	-12.6526	575	8.9	2106	-1	2753	0.212149	1496	-2.47906	462	5.8112	1874	-12.9591	1473	8.57008	451.1	-1.85145	460	-6.27168
549	4.25	338	-1.82266	3269	-6.1	3269	-6.1	458	-14.8403	1760	11.05	1190	6.7	1421	4.05	415.7	5.2095	409	-4.2	1003.1	-0.874874	1155	6	1696	0.45	2583.37	-3.14457	549.945	-6.91663	1351.68	-2.57762	626	2.5	678	-5.2	1177	2.81977	1819	1.97763	2728	0.814663	1632	3.78998	1467	6.81174	452	0.0784815	453	-5.64737
651	7.76	342	-3.14127	3267	4	3267	4	458	-15.4991	1768	14.79	1190	8.3	1442	4.57	417	0.464527	412	-0.8	1012	7.27062	1155	6.1	1696	-3.23	1496.11	5.09566	456.281	10.3765	1568.07	3.48021	589	7.7	661	-4.6	2745	0.348583	1327	-1.0355	1787	-1.17473	2019	1.61115	1469	7.72155	441	0.894763	453	-5.82467
651	11.73	346	2.46376	3234	0.8	3234	0.8	458	-14.672	1768	10.1	1190	6.3	1442	4.59	417.3	1.86277	413	-5.4	1018.4	7.13845	1155	6.5	1696	-1.12	2716.25	-1.01192	473.785	-8.74885	2643.43	-2.73066	577	8.6	624	0.9	1662	1.29746	978	0.0521492	1096	3.4875	974	-4.7432	1765	5.96194	466.9	-0.521243	453	-5.64737
653	13.4	347	-15.453	3233	1.71583	3233	1.71583	458	-16.7328	1769	2.14	1190	2.7	1362	4.6	418.5	-7.93271	414	2.1	1022.3	6.81244	1155	6.6	1697	5.17	1241.92	-5.3733	449.459	-9.99603	1499.82	1.8035	575	12	1370	4.9	1078	-0.571972	507	13.9766	927	-5.74078	1264	0.0798805	1473	7.05116	458.3	0.421436	455	-5.85575
656	5.5	347	4.9848	3219	0.5	3219	0.5	458	-20.3242	1770	2.23	1190	1	1400	4.63	419	-1.80735	414	-10.2	1024.7	8.16518	1155	7.2	1697	-1.7	1169.39	6.72461	458.185	9.02428	1229.05	3.14365	655	-0.7	976	-0.1	1428	4.31839	1426	8.05117	1882	0.919711	1836	-12.4511	1656	7.08675	507	0.774883	455	-5.82005
656	12.32	347	-0.741714	3193	-1.44507	3193	-1.44507	458	-13.3103	1770	8.82	1190	1.6	1428	4.88	419.5	0.255241	416	-1.8	1025.9	4.14411	1155	7.3	1697	0.51	2616.93	-0.935968	1339.78	2.71684	604.04	-12.1738	575	8.8	631	-6.1	1393	10.2653	1008	-9.27213	2101	-0.745862	2520	0.337023	1568	8.84718	743	-2.81237	455	-5.71687
656	10.45	348	0.120438	3151	-0.195567	3151	-0.195567	458	-48.9597	1770	3.27	1190	5.5	1436	5.17	421.2	-5.77154	418	2.7	1026.9	1.85919	1155	7.4	1698	4.3	1066.77	1.9505	2474.37	5.47104	540.403	-15.3128	1241	20.8	663	-7.9	1079	-11.2333	612	7.05462	1347	5.03775	2501	-1.12803	1468	5.27909	1020.8	3.91984	456	-5.69551
664	16.39	349	-0.402881	3115	1.71529	3115	1.71529	465	-12.0055	1770	5.63	1190	5.5	1377	5.41	421.8	3.26836	420	-4.1	1028.2	6.41943	1155	7.6	1698	7.9	1637.49	-1.45518	474.027	-8.69785	1643	5.08923	600	10	684	-5	1273	-3.19541	829	8.18364	444	-0.460923	1779	3.06753	1629	8.96359	1009.5	5.74366	456	-5.34879
674	9.99	349	-7.96179	3110	7	3110	7	465	-10.0421	1770	5.6	1190	6.8	1460	6.26	422.6	-1.63038	424	1.4	1029	4.41124	1155	8.1	1698	-2.67	1135.6	-0.381991	1481.59	7.87072	606.965	-13.9245	584	10.8	681	5.3	1250	2.28371	1893	-7.31553	1652	-0.0983467	2510	-0.50772	1477	7.52091	1003.4	3.83272	456	-5.63199
678	7.85	351	-3.71402	3108	0.281481	3108	0.281481	465	-15.6612	1770	2.67	1190	1	1367	6.34	423.1	0.564548	425	-9.2	1031.6	3.31772	1155	8.6	1699	2.04	1629.66	1.95177	474.683	-3.959	1548.22	1.91045	605	9.5	681	5.7	2765	-10.2263	1653	-3.1439	465	-2.0328	1835	-22.0344	1636	10.1114	959	3.15925	456	-5.13639
683	-0.25	351	-5.94203	3062	-1.3	3062	-1.3	465	-9.51289	1771	3.61	1190	4.8	1474	6.34	424.2	6.1387	429	-1	1032.2	5.95294	1158	2.9	1699	0.72	1084.55	2.23396	448.79	-8.621	613.593	2.98818	587	10.1	681	2.2	961.6	3.71737	653	7.58595	2632	0.905625	2796	0.496409	1628	5.50053	906.4	0.288447	456	-5.63199
706	-0.61	352	-6.56186	3043	-11.7	3043	-11.7	465	-18.4944	1773	5.08	1190	4.5	1441	6.82	424.9	6.21039	430	-2.1	1034.9	5.36449	1158	4.5	1700	3.5	1041.7	-3.98703	483.065	-7.06641	579.86	-5.08386	605	1.5	681	6	977.8	-0.633573	1550	5.93416	1700	1.22356	1906	2.14521	1473	8.24179	938	0.919651	453	-7.108
		352	-0.36207	3013	1.3	3013	1.3	465	-16.1872	1877	1.07	1197	4.2	1374	7.68	425.2	7.13285	432	-4.1	1036.2	3.80985	1158	5.8	1700	-1.54	1032.25	-3.87262	475.859	-8.95	1225.07	-5.19837	592	8.7	681	3.9	958.9	3.44993	1118	3.16548	1656	0.998657	2674	-4.48262	1630	7.78636	974.7	1.75808	453	-7.108
		352	0.373017	3008	-2	3008	-2	465	-13.6893	1752	6.29354	1197	3.9			426.6	-1.28698	432	-6.6	1036.8	3.51332	1158	6.4	1700	8.17	1261.77	-3.08886	475.818	-7.15996	1060.96	-3.65331	607	11.9	681	4.6	990.2	-1.70436	1736	2.57828	2543	-11.0671	971	-3.15499	1561	10.0555	975.2	1.49057	427	-7.91963
		353	0.503834	3003	-2.8	3003	-2.8	465	-12.203	1761	9.06041	1197	7.7			427.3	-4.02252	433	2.1	1041	4.30581	1158	6.6	1702	4.15	1056.4	-0.333986	971.761	4.39014	2071.61	0.973535	578	2.5	681	3.8	874.3	2.99816	695	7.94508	1127	-3.08886	1112	7.8168	1471	7.26849	1029	3.06163	417	-8.48035
		353	-2.14604	2996	7.3	2996	7.3	470	-10.7	1757	10.4033	1197	3.2			429	10.438	435	0.8	1046.6	3.56828	1158	7.1	1703	1.86	1482.22	2.00211	1209.32	5.37856	2060.64	1.86248	608	6	681	4.8	986.2	-2.62727	1646	1.89004	1332	5.86725	426	2.44656	1623	5.90111	1053.7	1.05776	422	-8.45768
		353	4.04087	2973	-4.1	2973	-4.1	470	-9.1	1753	8.68904	1197	0.2			430.5	-1.72277	435	1.1	1054.7	3.4499	1160	4.3	1703	-4.22	1087.42	-4.81074	1008.45	2.97817	532.401	-8.18459	628	-1.6	681	4.1	963.3	-3.74602	967	-2.03093	966	-1.1641	1186	-11.794	1479	9.41455	1027.8	0.714955	422	-6.3343
		354	-4.89886	2957	-5.6	2957	-5.6	470	-8.4	1758	6.47165	1197	0.4			431.2	-1.57345	436	-4.2	1055.4	0.969963	1160	4.5	1703	1.02	1474.84	3.91515	486.907	-8.23056	575.217	-8.11471	589	4.4	681	4.9	1361.1	4.56409	1118	9.728	1119	12.3984	2901	-9.06662	1627	6.54346	922	-2.02287	417	-8.8136
		354	-3.10556	2957	0	2957	0	470	-9.3	1755	9.77597	1197	5.6			431.9	-5.94177	436	-8.7	1056	4.68506	1160	5.5	1703	-4.23	2598.04	-1.33238	480.896	-10.2679	577.565	-6.08351	727	-0.1	681	5.3	1321.3	3.43368	684	12.5515	1391	2.31327	2849	-4.43021	1469	6.06488	1019.6	0.442235	417	-8.56582
		354	0.174352	2956	2.9	2956	2.9	470	-10	1751	7.59622	1197	5.3			434.3	-5.61018	436	-7.2	1056.8	1.71432	1160	5.6	1703	1.55	1263.31	-0.154497	1617.89	7.79016	949.271	-0.158892	585	3.3	681	5.2	963	-1.64274	483	-6.39122	1274	-0.691733	428	-7.24054	1627	5.57327	1069	1.96922	419	-7.80842
		355	-3.12387	2954	-4	2954	-4	470	-6.5	1755	5.91203	1197	1.4			439.9	-0.166463	441	-9.8	1057	-0.0355788	1160	6	1704	0.13	1472.84	5.74689	801.388	-4.37721	1521.65	2.04209	586	2.8	681	3	1684.2	-0.132595	1325	7.10768	1072	1.05646	1158	2.79062	1596	5.45513	992.4	-0.120644	424	-7.54543
		355	-4.29389	2947	-1.22813	2947	-1.22813	470	-8.9	1757	7.12325	1197	2.5			445.2	-2.03599	443	-14.8	1061.6	2.70054	1160	6.1	1704	-0.22	1339.19	4.81357	493.726	-5.65084	1858.36	-2.86466	1414	-1.5	681	2.4	2020.9	5.54752	1298	-2.62446	1884	-5.57497	1691	-1.51681	1625	8.41494	943.6	-0.709816	424	-7.47464
		356	4.40809	2946	-3.5	2946	-3.5	470	-9.1	1753	9.42842	1197	0.5			446.6	9.06902	447	5.6	1063.7	10.338	1160	6.4	1704	2.02	1042.11	1.21106	576.889	-4.19226	1728.33	-5.75395	570	3.1	681	3.6	977.1	-4.0817	1496	3.53928	1063	2.23452	2326	0.733822	1627	6.10226	1026.9	1.13589	429	-7.84307
		358	-3.78722	2945	-3	2945	-3	470	-7.2	1758	8.54454	1211	2.2			448.7	2.90249	447	-4.7	1068	3.44184	1160	6.5	1704	4.83	1106.39	-0.85543	461.738	-11.2499	1504.13	-1.13949	570	3	681	4.6	1638.2	-0.64881	1328	7.52412	2502	-4.28635	1635	0.580522	1470	8.48129	824.1	-3.09682	416	-9.37121
		359	-4.97385	2941	-1.7	2941	-1.7	470	-5.3	1756	10.1789	1211	5.2			448.9	-18.339	448	-2.4	1069.3	2.8018	1160	7.2	1706	2.94	1087.72	0.873716	472.375	-6.5386	2747.4	-7.07662	576	7.1	619	-6.4	1199.9	2.64091	772	5.97689	2667	-3.46874	1767	-12.394	1475	9.24929	987.4	-0.55267	435	-9.30813
		361	-3.95448	2937	-7.5	2937	-7.5	470	-8.8	1754	9.0371	1211	2.5			449.8	-0.828079	448	-5.2	1076.3	2.44347	1163	4.9	1706	5.23	1636.43	2.02718	479.49	-10.5645	1486.48	2.01478	594	3.1	619	-8.7	989.7	-1.80604	1448	-0.222508	2173	2.13084	2591	-1.79623	1478	-23.4133	968	-6.2348	421	-10.0363
		362	10.2689	2928	-9.2	2928	-9.2	470	-8.6	1745	10.5553	1211	5.2			452.6	5.27495	448	-5.4	1083.2	1.88694	1163	4.5	1708	4.11	1197.8	-2.53602	2479.01	-7.9019	576.328	-8.38495	562	3.4	619	-9.5	942.2	4.27475	506	-19.4066	1724	3.41002	1923	-6.03526	1529	10.8702	1031	-2.14855	444	-9.21926
		364	6.18609	2928	0.2	2928	0.2	470	-8.9	1737	7.49694	1211	4.5			452.8	-1.60343	451	0.2	1084.7	2.65373	1163	4.6	1708	0.66	1044.01	1.54238	975.876	-1.6395	1942.27	-10.471	568	3.5	619	-3.5	887	-3.88126	445	7.01827	1137	3.34201	2856	0.937702	1809	-5.41263	1137	1.73003	435	-7.3345
		366	-1.62453	2918	-1.8923	2918	-1.8923	470	-6.6	1754	8.9205	1211	2.2			455.4	2.37583	452	-2	1084.9	6.63586	1163	4.7	1708	7.29	1043.71	-3.27857	472.994	-9.2	2013.71	-0.695418	578	3.1	619	-26.2	1198.2	3.77576	1481	-5.07063	1326	-2.09807	1877	9.12113	1615	7.48721	1026.2	4.50317	441	-8.60395
		367	-1.32642	2902	-12	2902	-12	470	-3.1	1747	8.79138	1211	9.3			455.8	-0.781394	452	-6	1089.6	3.56522	1163	5.1	1709	1.82	1035.45	2.25614	461.585	-7.6411	602.595	-11.397	575	1.8	619	2.3	1630.6	1.2594	436	5.35414	976	-3.94482	2018	6.46333	1498	7.90078	1095	3.05478	441	-9.58516
		375	6.19233	2901	2.6	2901	2.6	470	-8.3	1754	9.51372	1211	8.9			455.9	-12.7144	453	-4.9	1089.9	4.37509	1163	5.2	1709	-7.15	997.124	-1.24693	487.737	-2.15103	1953.58	-3.95128	571	7.4	619	-14.7	2679.6	-9.43947	456	8.67561	1379	5.18857	1262	5.66246	1621	9.12941	1064	2.37964	418	-9.77282
		379	4.10352	2899	2.4	2899	2.4	470	-5	1754	8.96995	1211	2.3			455.9	4.87254	456	-2	1090.5	1.17366	1163	5.3	1709	-0.53	1143.14	1.73997	455.185	-20.5717	1811.59	0.614156	571	3.9	619	2.2	968.7	7.08794	464	10.7297	1176	-1.05295	669	-4.62373	1620	7.91214	1028	0.519621	424	-8.70538
		390	0.234057	2891	2.6	2891	2.6	470	-9.5	1738	9.51593	1211	4.1			456	-1.33922	464	-0.2	1090.7	5.95382	1163	5.5	1709	-1.99	1123.71	0.240654	457.153	-10.3654	569.556	-12.5468	562	3.4	619	-12.1	1610.8	0.174002	474	7.1181	1017	1.77907	2663	-4.8615	1566	9.52701	1043.3	3.85389	434	-8.06753
		398	-7.41794	2883	-0.5	2883	-0.5	470	-7.7	1734	8.14796	1211	8.6			456.1	-0.817538	470	-3.1	1090.8	7.18718	1163	5.6	1711	-0.1	1021.17	0.713388	490.874	-9.33389	556.402	-1.85861	598	5.9	619	-25.2	922.6	3.32746	465	9.78801	478	2.54072	2722	0.853055	1580	9.03361	1116	5.7761	411	-11.8537
		406	-11.1286	2877	2.2	2877	2.2	470	-3	1726	9.13036	1211	3.5			457.3	1.23937	506	-9.2	1091.2	3.6148	1163	6.2	1712	1.99	2038.01	-15.5406	488.079	-4.55249	1744.78	-3.03879	579	4.1	619	1.3	981.9	-2.92318	1672	-0.0265047	1051	-0.501697	2470	-4.20359	1607	3.87166	1107	2.73089	461	-9.61012
		409	-4.16443	2875	-0.696049	2875	-0.696049	470	-10.2	1724	6.49839	1400	3.7			457.6	-6.32077	514	2.7	1092.4	7.51953	1167	4	1714	7.4	2691.47	-9.5938	480.154	-0.272921	2041.15	0.0976973	581	3.4	619	-25.6	1589.2	-3.19716	451	3.97355	1062	5.00851	1072	6.2192	1572	11.122	1159	7.35346
		424	-4.8	2871	3.6	2871	3.6	470	-2.1	1718	8.3895	1400	3.7			458.9	0.299217	543	5.9	1094.5	13.9238	1167	4.4	1714	-0.26	1736.42	-5.95125	472.996	-21.1638	644.565	-5.72799	572	3.9	619	-17.4	1403.8	3.52049	2829	3.87768	652	-11.6015	1878	-19.8005	1614	5.65854	1031	2.7634
		424	-4.9	2863	2.9	2863	2.9	470	-10.6	1718	6.93408	1400	1.7			459.8	-16.5993	562	5.2	1094.8	6.11748	1167	4.9	1715	1.03	1777.72	-20.5372	463.373	-10.7395	1300.95	3.26037	555	-2.4	619	-13.1	948.2	-2.45531	431	7.6112	1458	4.14913	1821	-8.40541	1579	10.1307	1136	2.4873
		426	-2.69146	2860	-0.9	2860	-0.9	470	-42.2	1717	6.17355	1400	2.7			461.3	-1.28824	330	-5.45417	1096.2	4.95781	1167	5	1716	5.66	982.166	-2.33491	475.703	-10.2997	1526.7	1.09954	586	5.3	619	-5	1778.7	0.540095	467	8.27668	459	-2.91865	403	5.88371	1609	8.03754	1144	3.20567
		426	-3.21173	2854	-2.3	2854	-2.3	470	-29	1723	6.79634	1400	1.6			461.5	-8.51816	359.5	-1.01746	1096.7	3.25603	1167	5.2	1716	-3.14	1354.49	6.1305	465.885	-7.00885	651.04	-7.43097	581	5.7	619	-17.6	1155.2	1.72523	446	6.51591	681	-4.43337	1089	9.24841	1557	6.82452	1170	5.19003
		430	-3.5	2851	-17.7777	2851	-17.7777	470	-36	1731	5.47671	1400	0.7			461.5	-16.4059	364.8	-3.63537	1097	9.13033	1167	5.3	1716	-0.19	1233.25	-0.499767	440.371	-12.6287	921.813	-4.00709	580	2.6	619	-3.3	959.1	-0.724159	976	-1.34693	971	4.24987	2774	0.823603	1802	-1.27208	1117	6.20102
		430	-3.1	2848	13.7	2848	13.7			1726	6.68014	1400	0.2			461.8	-17.4661	367.6	2.68175	1112.4	3.20386	1167	5.4	1717	4.95	1363.65	-7.8835	468.778	-20.4951	957.757	-4.07022	608	2.3	619	-4.5	1451.3	6.25919	472	7.9764	958	-0.939184	2643	0.204532	1800	-0.100204	1044.6	2.13716
		430	0.212	2847	2.3	2847	2.3			1715	7.54677	1400	1.7			462.1	-10.7666	370.3	0.580994	1112.9	11.2581	1167	5.6	1718	-6.26	987.618	-5.23722	550.509	-7.73203	1563.98	2.0738	575	4.1	619	0.7	951.8	-0.952156	1022	2.51335	972	0.857045	2823	1.75294	1614	7.1473	528	-12.5065
		430	5.8	2843	-2.3	2843	-2.3			1720	9.99223	1400	1.3			462.1	0.419719	372.2	0.219288	1113.5	6.67431	1167	5.7	1719	7.61	1643.33	-0.154202	474.853	-9.19363	2177.65	2.31313	606	7.4	619	4.4	2763.5	-2.44418	451	6.62787	957	-0.362026	2683	-0.75205	1612	7.98407	987	8.97144
		431	3.3847	2843	4.06187	2843	4.06187			1726	5.52722	1400	3			463.6	-14.7663	376.2	1.69935	1130.4	5.72072	1167	5.8	1719	5.03	1043.62	1.37332	467.494	-10.0203	1496.84	5.64819	606	6.9	619	0.9	712	2.40947	462	6.07754	1422	7.03591	460	-1.63285	1623	9.96377	1088	1.02256
		431	-4.6	2841	-3.9	2841	-3.9			1719	6.18496	1400	3.4			465.2	-4.88437	378	3.5838	1143.1	5.11749	1167	5.9	1720	-6.66	2697.73	-1.11948	1922.71	-10.8856	2141.77	-12.0776	562	4.1	619	3.3	2624	-5.98673	448	6.33229	662	2.716	1831	-13.0975	1720	6.85218	1237	3.39632
		431	-5	2838	-11.8412	2838	-11.8412			1717	9.41687	1400	1.3			466.7	5.14355	378.6	1.37612	1147.6	3.99598	1167	6	1720	-3.03	1156.1	1.32292	443.411	-11.736	576.994	-13.445	562	2.2	619	-3.8	1471	2.26209	427	-4.59156	1831	-3.35368	2302	-2.36117	1621	6.65481	1110	3.23659
		431	-3.5	2831	-2.4	2831	-2.4			1715	7.4753	1405	0.9			467.3	0.427334	380.9	3.96718	1153.9	5.43045	1167	6.1	1722	4.38	2620.99	3.15404	462.31	-10.7361	528.511	-4.46749	635	4.2	619	4.6	1397	10.4907	413	5.18305	963	7.73036	1908	-1.41548	1609	8.55188	450.1	-3.04496
		431	-3.1	2830	-0.766126	2830	-0.766126			1728	8.31758	1405	3			468	5.1555	382.2	1.69268	1155	5.58981	1167	6.4	1723	-12.46	1002.94	-12.5534	508.542	-18.6012	2087.49	0.643702	635	1.2	619	-33.9	1992	-0.20821	456	0.970847	970	-3.02656	1901	-6.09372	1503	6.0552	1083	1.99451
		431	-6.1	2827	5.1	2827	5.1			1713	9.20933	1405	1.8			468.1	-12.3175	385.4	-0.950004	1155.3	6.47247	1167	8.2	1723	-5.8	1175.15	6.28406	509.534	-17.5272	748.649	7.24741	617	6.9	619	-9.7	1157	6.91615	489	9.26465	647	-8.06838	1842	-13.8235	1558	9.54143	1178	4.18338
		431	-2.3	2826	6.3	2826	6.3			1713	7.44084	1405	1.7			468.2	4.04509	388.3	2.31966	1155.5	3.37304	1170	3	1724	4.75			2587.68	1.22588	538.927	0.887853	667	3.3	619	-0.5	1617	-0.290175	462	9.72175	1312	5.42523	1886	-14.1496	1608	4.75312	1438	6.52832
		431	-3.1	2826	-2.1	2826	-2.1			1719	10.8652	1405	3.5			470.5	1.3919	393.3	-7.70287	1156.3	10.1753	1170	5.4	1725	-6.11			446.811	-12.4291	537.128	1.28979	641	1.6	619	-2.7	2939	3.56709	459	5.77466	1667	-2.28305	2875	-8.02067	1528	6.61454	972.3	-1.5639
		431	-3.5	2824	-0.6	2824	-0.6			1718	7.66939	1405	0.6			471.3	-22.0111	397.9	-0.317749	1156.6	2.2627	1170	5.6	1725	7.36			1133.29	-0.443517	594.181	-10.8317	641	1.1	619	-8.5	1188	5.04896	447	8.57299	628	-3.33293	2838	0.893264	1621	8.40687	1170	2.99196
		431	-4.1	2823	-0.2	2823	-0.2			1725	7.18743	1405	1.9			472.9	1.17749	399.7	2.38106	1159.5	5.25426	1170	6.1	1727	2.42			786.127	-2.4116	1805.24	-5.34744	665	7.4	619	-4	1160	0.812746	476	9.00856	989	2.88196	1927	-5.19622	1731	6.65981	1138	3.54053
		431	-3.9	2822	-9.5	2822	-9.5			1714	8.78466	1416	1.1			474.2	-0.66268	404.9	-0.342113	1159.8	6.33267	1170	6.2	1727	-0.13			476.686	-9.17258	1500.62	1.06207	639	8.9	619	6.5	1018	4.24666			1095	2.73095	2860	6.57815	1731	5.75067	1081	-2.5327
		431	-5.2	2821	0.9	2821	0.9			1717	7.37304	1416	0.1			474.3	-7.36107	411.3	5.15482	1160.6	9.77524	1170	6.3	1727	-3.05			466.678	-9.92575	1006.31	-0.420026	588	6.8	619	7.6	693	-2.54431			978	-3.08813	2835	-1.28582	1606	6.63679	1187	0.972104
		432	-1	2821	-1.6	2821	-1.6			1722	8.90874	1416	0.3			474.6	0.235551	412.5	3.14345	1161.3	7.10113	1170	6.5	1727	-4.25			449.169	-16.6504	1775.59	4.20564	612	2.5	620	6.9	1485	7.5872			642	-6.0671	2305	-14.859	1581	4.1752	905.5	-2.31255
		432	-0.8	2818	0.6	2818	0.6			1742	8.52716	1416	2.1			475.5	-3.30212	412.6	0.461371	1167.2	2.09284	1170	6.7	1728	6.56			482.178	-12.8259	3022.06	2.29241	651	9	620	4.7	692	3.53313			635	-3.25999	3335	-1.40443	1537	6.95896	1090	-0.887871
		432	-1.6	2817	2.5	2817	2.5			1748	10.0132	1416	1.1			478	1.2943	415.7	5.2095	1167.9	5.72141	1170	6.9	1729	4.97			1392.82	-8.91396	610.148	-12.1031	615	7.5	620	6	1186	1.98977			979	0.148029	2573	2.32746	1622	5.50856	1171	2.15542
		433	2.1	2812	5.5	2812	5.5			1762	8.65544	1416	3.9			482.7	2.04688	417	0.464527	1168	3.87595	1170	7.1	1733	4.72			472.559	-19.8871	552.784	-8.47608	615	9.6	620	5.7	1100	10.2975			2453	-3.15724	472	-6.40132	1496	7.17448	972.3	3.34271
		433	2.4	2812	0.5	2812	0.5			1762	10.1693	1416	1.7			483.3	0.126906	417.3	1.86277	1168.1	5.89917	1170	7.3	1734	5.12			1071.46	2.95965	2074.15	6.76769	626	3.5	620	4.8	1918	-0.977914			674	3.37864	474	-8.18148	1617	5.8189	988.5	-3.35648
		433	1.1	2810	-4	2810	-4			1761	10.6398	1416	1.5			484.8	0.364186	418.5	-7.93271	1169.4	6.55909	1170	7.4	1737	4.33			454.462	-20.3328	1517.06	-4.42234	566	2.4	620	5.6	668	5.46637			1629	3.35102	826	-3.78595	1585	7.86486	1088	1.25629
		433	1.2	2810	-1.7	2810	-1.7			1760	6.06728	1420	2.8			485.3	5.92186	419	-1.80735	1169.6	2.50201	1170	8	1738	5.46			469.914	-16.0965	1010.18	-7.02528	566	2.6	620	7.3	1233	4.79668			986	-0.806665	480	-3.94425	1615	7.70843	1164	3.40753
		433	1.5	2808	0.1	2808	0.1			1758	9.89931	1420	3			486.1	1.17734	419.5	0.255241	1169.8	6.33566	1170	8.1	1739	-9.25			452.787	-18.9362	3399.3	2.40663	644	7.4	620	4.6	1752	6.17178			969	-0.811998	468	-9.90827	1610	5.15351	596	-9.4539
		434	-7.07237	2808	3	2808	3			1762	8.08504	1420	6.1			488.2	-5.02113	421.2	-5.77154	1170.4	9.72661	1170	8.3	1739	-3.4			441.504	-15.5386	580.768	-5.9693	609	8.2	620	4.9	1635	2.3083			2699	5.83086	524	-2.44442	1624	5.47985	1036	1.06327
		434	-2.9	2807	-7.8	2807	-7.8			1755	8.61885	1420	5.5			501.8	-0.181305	421.8	3.26836	1173.4	14.332			1740	-3.72			882.863	-11.3375	555.871	-11.3893	2160	3.7	620	6.8	2707	2.67161			1016	-10.0521	1896	-12.1682	1576	10.0609	1159	3.61167
		434	-2.8	2805	-0.5	2805	-0.5			1759	9.81307	1420	0.4			532.4	-5.56364	422.6	-1.63038	1173.9	7.77247			1741	3.79			1107.39	2.25112	1466.01	4.98099	631	6.6	620	-0.1	1852	6.68971			1136	6.53324	481	-1.07836	1496	10.6302	1105	2.04309
		434	-2.6	2803	-0.1	2803	-0.1			1754	10.6649	1420	0.9			554.7	-3.02358	423.1	0.564548	1175.6	1.45434			1743	3.61			1929.57	-1.21589	1057.71	-3.09479	734	2	620	6	635	2.69248			1053	0.437799	2733	-2.96867	1616	5.84655	1131	1.27411
		434	-3.1	2802	-5.8	2802	-5.8			1742	7.8004	1420	4.4			563.5	-48.2583	424.2	6.1387	1178.2	7.53876			1753	2.53			1234.03	0.769051	613.253	-8.13561	594	3.4	620	4.7	1449	1.72872			1670	2.88555	465	-7.25119	1582	9.31438	1005	2.21612
		434	-3.3	2799	3.6	2799	3.6			1745	8.66955	1420	0.3			566	-6.04997	424.9	6.21039	1181.4	6.42892			1766	8.5			455.52	-20.1988	1229.39	-6.75483	595	1.9	620	3.8	1336	5.4315			1313	6.38403	456	-7.43821	1611	7.67107	1018	-1.2594
		434	-2.3	2793	1.9	2793	1.9			1759	9.33998	1420	2			572.7	-8.72222	425.2	7.13285	1181.4	2.52096			1779	9.55			1491.62	9.76728	606.983	-9.42754	602	7.2	620	5.2	979	3.47413			2598	1.05922	489	-4.84888	1584	8.6151	1071	-0.763958
		434	-2.6	2791	-2.6	2791	-2.6			1748	9.14156	1420	2.5			585.7	-12.4935	426.6	-1.28698	1182.3	3.59054							483.891	-19.2669	604.168	-11.4903	739	-5.8	620	4.5	2792	3.20253			1656	-0.784988	2756	-3.84453	1497	4.08189	884	-2.0618
		434	-1.8	2784	0.9	2784	0.9			1746	9.34952	1420	1.3			586	1.85844	427.3	-4.02252	1188.8	7.61293							480.297	-13.6074	646.778	-11.4525	608	6.8	620	5.3	1869	-11.4264			2831	-1.10952	479	-4.34994	1730	7.95611	1099	2.46199
		434	-1.4	2782	-3.6	2782	-3.6			1752	5.67254	1421	1.8			592.3	2.43065	429	10.438	1191.2	2.95452							938.292	-5.90432	2612.64	-6.10359	614	4.5	620	4.1	1642	2.05389			1046	12.8637	479	-4.64693	1572	10.3522	989.8	3.8152
		434	-1.6	2781	-7.6	2781	-7.6			1751	6.46547	1421	1			601.2	-11.5178	430.5	-1.72277	1191.3	5.07894							465.277	-10.9388	1492.26	0.087648	594	5.9	620	5.4	1122	9.00675			1456	2.11619	484	-2.80111	1573	8.92194	994	0.622183
		434	-3.9	2779	-0.1	2779	-0.1			1762	6.54721	1421	2.5			611.4	3.58894	431.2	-1.57345	1193.2	4.78159							472.755	-9.20133	1485.37	3.25135	640	4.3	620	5.9	1375	6.23829			1369	3.66728	1834	-22.2912	1730	-3.25754	1129	3.12181
		435	-5.59575	2777	-1.1	2777	-1.1			1753	9.65565	1421	4			612.6	2.82151	431.9	-5.94177	1193.9	4.53307							460.93	-19.374	620.17	0.783671	612	5.1	620	-5	1086	0.273745			956	-1.93175	483	-6.48121	1497	7.15239	944	-1.27899
		436	-2.6899	2776	1	2776	1			1716	7.59151	1421	6.4			615	-10.4382	434.3	-5.61018	1195.6	7.78265							1724.28	-15.4557	2100.19	-9.19191	599	9.5	620	5.4	1663	2.68369			1104	-1.11387	481	-7.8931	1574	7.94868	1182	0.663543
		437	-4.20714	2775	3.5	2775	3.5			1839	8.67282	1421	4			615.1	-4.19748	439.9	-0.166463	1199.3	7.99301							486.767	-10.6948	1863.65	0.582594	605	6.1	620	5.2	1046	-0.796473			1077	5.30202	2956	0.229836	1606	9.44309	1061	2.49957
		437	0.352463	2774	-5.7	2774	-5.7			1727	8.32995	1421	0.2			617.4	3.1171	445.2	-2.03599	1202.7	11.3678							459.813	-13.8529	1294.57	3.00369	644	8.6	620	5.3	1098	5.44432			1657	-0.733054	1846	-8.28023	1516	7.38119	1127	2.88259
		437	1.40351	2771	-1.6	2771	-1.6			1733	9.05302	1421	4.5			625.8	3.20481	446.6	9.06902	1207.4	6.67807							2632.73	6.78919	600.994	-11.2816	591	4.1	620	4.4	1968	-13.8878			1872	-6.59327	1855	-7.37896	1539	4.53173	1053	1.35229
		437	-8.08147	2767	-10	2767	-10			1726	6.58832	1421	3			627.9	2.1611	448.7	2.90249	1212.1	2.6413							450.731	-19.4268	1230.57	1.7214	604	7.4	620	4.8	691	2.53163			1403	7.3835	492	-6.91967	1529	3.30282	1054	4.50185
		438	-3.7	2765	0.8	2765	0.8			1736	7.1431	1421	4.3			628.5	-2.67859	448.9	-18.339	1212.2	-3.93386							1094.73	1.45331	572.56	-12.0039	619	8	620	5	1376	6.84144			1886	-3.39429	478	-6.47829	1604	11.2971	1083	4.3189
		438	-3.4	2761	-21.2	2761	-21.2			1735	9.21191	1430	4.2			628.8	-4.59923	449.8	-0.828079	1212.2	7.83783							819.485	-8.17119	1889.01	-2.15192	618	9.1	620	3.7	2675	1.94114			1179	4.67742	3026	3.36583	1511	9.39816	1064	3.29269
		440	1.66236	2761	-8.7	2761	-8.7			1730	7.24453	1430	4.5			630.1	-1.59027	452.6	5.27495	1212.4	2.31332							441.637	-17.4669	2032.06	-5.8925	625	4.9	620	3.6	2675	1.25058			1349	9.29719	485	-5.39576	1544	8.17773	1062	0.138141
		440	2.28631	2759	-3.6	2759	-3.6			1728	5.98848	1430	1.6			637.7	-4.23444	452.8	-1.60343	1212.6	5.83606							1168.37	6.52844	524.341	-10.158	576	3.3	620	4.7	1456	5.27948			1243	5.78758	1650	1.67298	1508	4.23353	768	-6.92378
		440	-6.74924	2757	-3.1	2757	-3.1			1729	7.74325	1430	0.5			641.4	-3.3238	455.4	2.37583	1220.9	5.70447							464.012	-16.3074	522.717	-3.74543	637	9.1	619	7.4	1638	-0.38525			1112	8.69047	1312	6.67373	1479	5.14212	1094	3.43493
		440	-6.57551	2752	2.6	2752	2.6			1733	6.16089	1430	3.1			643.6	0.454289	455.8	-0.781394	1238.4	6.68317							449.975	-11.059	605.405	-10.3576	604	3.9	619	8.8	1458	3.80367			1902	-2.79834	1902	-7.67025	1536	7.5623	1012	2.18705
		443	-7.06878	2751	-1.8	2751	-1.8			2483	-3.06713	1430	2			710.6	7.14653	455.9	-12.7144	1240.6	1.39878									517.714	-14.2639	650	9	619	8.8	1173	4.2426			972	1.47861	729	4.57672	1620	0.233208	1178	2.40217
		443	-8.84126	2751	1.1	2751	1.1			1729	7.92333	1430	0.6			757.7	-1.47889	455.9	4.87254	1241.8	8.85804									2608.94	1.23669	723	3	619	8.7	1387	6.07484			1459	-1.29318	2509	-9.73453	1489	7.57297	1012.5	-0.827525
		445	1.44778	2745	-3.6	2745	-3.6			1724	6.5966	1430	1.2			921.7	-0.643069	456	-1.33922	1248.9	7.71275									2044.19	-0.525754	575	1.8	619	6.4	1077	5.36694			1110	3.77668	2652	3.43572	1538	5.49156	1245	1.47257
		445	-0.4141	2745	-3.5	2745	-3.5			1725	10.2295	1430	1.2			934.9	4.73363	456.1	-0.817538	1254.7	4.85123									623.591	-3.53699	606	4.8	619	10.7	1021	-0.893138			1075	-5.26768	451	-1.513	1541	6.19998	1120	1.99185
		446	-5.21657	2744	-3.2	2744	-3.2			1730	10.9445	1430	0.2			936.1	-0.15191	457.3	1.23937	1276.8	11.8526									1505.75	1.56308	645	9.8	619	7.3	1647	0.227057			1309	5.19535	1344	8.08778	1606	8.23096	1138	3.21021
		446	-6.1	2738	-0.5	2738	-0.5			1945	-5.17004	1430	1.1			937	3.49597	457.6	-6.32077	1329.4	4.2384									588.43	-5.87615	617	7.2	619	8.7	1876	-12.1643			1916	-8.52957	2733	-0.292308	1596	5.12399	1032.3	0.522984
		446	-5.8	2737	-2.4	2737	-2.4			1720	7.49117	1430	2.6			940.1	2.08045	458.9	0.299217	1333.1	3.95418									620.168	-6.40138	622	8.7	619	9.4	1085	3.18871			1581	-0.872066	1863	-5.37328	1495	9.94162	1090	1.21361
		446	-5.7	2735	-15	2735	-15			1733	5.71137	1430	3.5			949.5	2.5469	459.8	-16.5993	1336.2	12.3473									607.099	-10.4392	586	1.6	619	8.6	1143	4.07688			979	-2.4662	1333	8.72727	1564	8.71423	897	-5.30027
		446	-5.9	2735	-3	2735	-3					1430	0.8			949.7	8.88738	461.3	-1.28824	1343.4	7.49118									1838.44	-12.2741	637	6.4	619	9.4	1910	4.17303			1486	7.89708	2803	-0.477398	1607	5.0687	1039.8	-0.484129
		446	-6	2733	1.3	2733	1.3					1430	1.2			952.6	-4.2426	461.5	-8.51816	1345.3	4.45923									529.368	-9.09273	646	8.2	619	7.7	1307	5.81886			1227	9.95855	2732	-2.9755	1650	2.28159	996.7	0.688796
		447	-7.85492	2733	-1.8	2733	-1.8					1430	0.3			963.4	1.03627	461.5	-16.4059	1350.2	11.3799									2111.79	4.71022	755	8.3	619	9.1	1173	5.52691			469	7.97083	2808	-6.5829	1617	5.20767	911	-6.06042
		448	-3.52998	2733	-9.11241	2733	-9.11241					1430	1.2			963.7	0.425233	461.8	-17.4661	1371.2	7.87418									1067.39	-0.966942	623	6.7	619	8.4	1468	4.71327			1154	0.728949	2954	1.61448	1562	8.99162	1204	0.912234
		450	-1.29847	2732	0.2	2732	0.2					1430	1.2			969.4	7.77646	462.1	-10.7666	1379.7	6.55954									532.735	-10.7235	617	10.1	619	7.8	1214	6.62428			2752	-4.65763	1755	-3.49371	1562	10.3579	979	1.47043
		450	-7.39124	2729	-6.3	2729	-6.3					1430	0.3			969.7	4.49566	462.1	0.419719	1392.6	7.76151									543.75	1.44447	620	5.9	619	9.8	1343	2.78245			1374	7.92908	2460	-2.12666	1607	6.52524	1196	1.25846
		451	-5.70371	2729	-7.1	2729	-7.1					1430	3.6			969.8	11.9021	463.6	-14.7663	1444.6	10.9558									1803.89	-5.29506	654	6.5	619	7.9	1626	2.59877			1386	-4.50842	2460	-0.523119	1496	4.21742	1125	2.14185
		452	3.07048	2727	-0.8	2727	-0.8					1430	4.2			970.1	-8.017	465.2	-4.88437	1444.7	0.186438									666.386	-11.2637	626	6.9	619	8	997	3.86655			1061	4.11981	1734	-8.31947			1014.8	4.55774
		454	-4.23608	2727	-1.2	2727	-1.2					1430	0.7			975.4	6.51626	466.7	5.14355	1453.4	6.69037									594.225	-3.13882	627	3.8	619	7.4	1168	4.17729			1808	-1.12648	2853	2.27618			1010	-3.65776
		455	-4.99117	2725	-0.4	2725	-0.4					1430	2.5			988.4	4.723	467.3	0.427334	1453.7	-1.70731									590.56	-14.6728	606	2.3	619	9.2	2765	0.517409			1672	0.957496	671	4.21996			1156	3.46963
		455	0.929837	2723	-2.5	2723	-2.5					1430	0.2			995.1	4.6228	468	5.1555	1457.3	9.14862									2066.29	2.48095	626	4.8	619	9.1	1333	5.9952			970	-2.61011	3197	-3.23028			1098	1.32723
		457	-3.90214	2723	-0.9	2723	-0.9					1430	0.3			995.7	2.23094	468.1	-12.3175	1462.4	6.85622									525.505	4.99949	631	6.9	619	8.2	1657	-13.6569			1831	-9.17518	971	-4.36712			1036	-0.694565
		458	-14.2675	2722	1.6	2722	1.6					1430	0.5			996.4	2.82821	468.2	4.04509	1467.2	7.93956									2617.46	-5.81093	616	5.5	619	7.3	1644	-4.62439			1141	5.77553	1858	-0.64066			1192	-0.803819
		459	-6.22665	2722	-13.7	2722	-13.7					1430	0.7			1000.3	2.7107	470.5	1.3919	1472.6	-0.496939									1661.25	-6.28416	604	2.8	619	6.7	1291	3.46896			865	-3.85549	2581	-0.093399			1152	-2.62916
		459	1.33512	2721	-5.7	2721	-5.7					1430	0.8			1003.1	-0.874874	471.3	-22.0111	1488.1	7.73626									606.181	-11.9981	622	6.6	619	9.4	1467	3.04027			2594	-11.5575	2460	1.9458			1035.2	0.420762
		461	-4.34396	2719	1.9	2719	1.9					1582	4.4			1012	7.27062	472.9	1.17749	1493.3	5.76425									618.948	-4.271	609	3.9	619	6.2	1653	2.67132			2911	1.6069	2454	-1.45929			855	-6.6845
		463	-3.15479	2716	-13.9804	2716	-13.9804					1582	0.2			1018.4	7.13845	474.2	-0.66268	1498.1	4.16195									537.535	-10.4318	620	2.8	619	6.4	2654	5.49117			1159	7.7122	2589	0.092587			1080	0.19856
		467	-1.13986	2714	-1.8	2714	-1.8					1619	0.3			1022.3	6.81244	474.3	-7.36107	1503.1	7.31931									598.298	-8.81924	613	6	619	9	1923	-1.87074			2742	2.23111	371	-2.27072			982.3	-0.83258
		467	-5.41304	2712	-2.88836	2712	-2.88836					1619	4.2			1024.7	8.16518	474.6	0.235551	1503.5	9.5828									603.608	-9.78612	623	6.7	619	8.7	1870	-5.3637			1859	8.49992	2060	-16.2547			1021.9	3.02117
		468	-3.73371	2710	-0.1	2710	-0.1					1655	1.8			1025.9	4.14411	475.5	-3.30212	1588.4	6.90085									2709.68	-3.40655	572	3	619	6.4	923	0.621943			1093	-1.83972	2091	-2.36403			647	-7.39172
		473	-4.85628	2709	2	2709	2					1655	5.7			1026.9	1.85919	478	1.2943	1637.5	5.8379									665.947	-14.9975	590	5.7	619	6.7	1393	1.27555			1748	-2.66005	1396	-18.4709			1146	1.9672
		474	-0.59378	2709	-7.5	2709	-7.5					1655	1.8			1028.2	6.41943	482.7	2.04688	1639	6.45617									538.387	-3.25587	604	4	575	7.7	1106	-2.16626			1892	-8.85608	1396	-22.8111			1036	-1.74953
		479	-2.95848	2708	-3.6	2708	-3.6					1655	0.5			1029	4.41124	483.3	0.126906	1647.6	2.63389									531.176	-12.4685	643	4.7	575	8.5	1638	-3.31705			2374	-10.2145	1808	-11.55			1014	-2.14124
		479	11.1924	2708	-11.1	2708	-11.1					1655	4.3			1031.6	3.31772	484.8	0.364186	1649.1	4.26631									1159.82	1.57586	564	3.3	575	9	993	-1.2443			1797	-14.9266	2421	-4.79575			1086	2.59085
		487	-11.8382	2708	-0.201863	2708	-0.201863					1655	3.4			1032.2	5.95294	485.3	5.92186	1659.8	1.50631									2523.85	-0.674317	605	5.9	575	7.7	979	-1.18961			1824	-10.0921	971	-0.709432			1070.4	2.8612
		490	1.35532	2707	-0.7	2707	-0.7					1655	3.4			1034.9	5.36449	486.1	1.17734	1673.7	7.94127									1051.56	2.98421	626	6.5	575	8.3	985	-9.75534			1098	1.7473	1261	9.94959
		493	-1.84806	2707	-6.70835	2707	-6.70835					1655	1.1			1036.2	3.80985	488.2	-5.02113	1699.7	5.32762									974.443	1.80686	617	5.4	575	7.5	1404	6.55784			2724	-4.20622	667	4.39849
		493	-3.99514	2706	-3.4	2706	-3.4					1655	4.3			1036.8	3.51332	501.8	-0.181305	1738.3	7.45839									602.499	-1.25281	607	4.7	575	6	983	-2.29778			1640	-0.249658	1844	-13.1924
		497	2.0561	2703	-9.2	2703	-9.2					1655	0.9			1041	4.30581	532.4	-5.56364	1745.9	2.71233									496.02	-7.21152	607	5.5	575	8.1	1674	5.7229			1903	-3.40694	2703	-0.97293
		502	3.08744	2703	-9.6	2703	-9.6					1655	3			1046.6	3.56828	554.7	-3.02358	1756.6	5.84136									495.822	-3.59321	638	1.3	575	9	978	0.404041			1958	3.06355	2725	-0.456157
		502	3.49582	2701	-6.4	2701	-6.4					1655	4.3			1054.7	3.4499	563.5	-48.2583	1761.2	11.8395									984.802	-0.959887	613	4.3	575	7.6	975	-1.80764			1263	3.02272	2717	-5.31125
		505	-8.06557	2701	-2.4	2701	-2.4					1655	4.4			1055.4	0.969963	566	-6.04997	1770.1	1.16472									597.713	-5.92022	603	4.2	575	6.9	982	0.140172			992	2.4328	1843	-20.0041
		508	2.13986	2700	-4.4	2700	-4.4					1655	2.4			1056	4.68506	572.7	-8.72222	1784.7	1.99323									518.708	-16.179	600	4.1	575	8.5	966	-2.27716			496	0.411994	2991	3.54434
		508	-7.89837	2698	-6.2	2698	-6.2					1655	3.9			1056.8	1.71432	585.7	-12.4935	1806	6.0207									1975.43	-2.77008	621	3.2	575	9.6	1412	3.52357			1772	-16.5276
		512	4.98102	2696	-14.4	2696	-14.4					1657	0.3			1057	-0.0355788	586	1.85844	1895.2	7.53885									599.362	1.73495	670	4.8	575	6.6	992	-6.2857			1751	4.20453
		514	5.15606	2695	-8.02362	2695	-8.02362					1657	3.7			1061.6	2.70054	592.3	2.43065	2566.8	6.02524									1974.8	-1.30902	628	2.3	575	7.4	1005	-0.614719			1404	7.00501
		526	-11.3335	2694	-3.7	2694	-3.7					1657	0.9			1063.7	10.338	601.2	-11.5178	2702.4	-0.152403									503.42	-8.99394	631	6.8	575	8.4	2297	-10.7231			1154	4.72892
		528	-5.16465	2694	-2.5	2694	-2.5					1657	2			1068	3.44184	611.4	3.58894	2708.1	-0.0522295									601.627	-7.84735	613	-0.4	575	8.1	969	-3.91096			1177	8.57082
		546	-1.85441	2693	-3.5	2693	-3.5					1657	1			1069.3	2.8018	612.6	2.82151	2718.4	-6.48146									1529.21	2.93127	621	6.1	575	9	965	-0.285125			1896	-6.02516
		550	-0.0924813	2692	-6.5	2692	-6.5					1657	0.5			1076.3	2.44347	615	-10.4382	2720.8	5.47226									1510.67	3.98696	609	5.3	575	10.3	1068	6.2602			686	1.49016
		552	7	2692	1.32803	2692	1.32803					1657	2.9			1083.2	1.88694	615.1	-4.19748	2723.5	4.75576									600.644	-5.10493	604	5.3	575	7.9	976	-0.768065			1142	-0.36927
		556	0.5	2691	-8.8	2691	-8.8					1657	6.9			1084.7	2.65373	617.4	3.1171	2724.2	-3.55994									1202.53	4.06994	607	5.2	575	8.1	959	2.01156			1071	0.10282
		557	4.4	2691	-11.1	2691	-11.1					1657	2.3			1084.9	6.63586	625.8	3.20481	3007.2	1.70811									620.296	-12.2517	687	3.6	575	9.4	1058	7.08019			490	6.05591
		558	7.1	2691	-0.716067	2691	-0.716067					1657	6.4			1089.6	3.56522	627.9	2.1611	906	-3.5									512.193	0.63206	614	3.8	575	8.6	1381	6.32893			976	-0.888967
		558	-0.3	2691	-4.77603	2691	-4.77603					1657	9.9			1089.9	4.37509	628.5	-2.67859	980	2.4									616.601	-9.02965	629	3.7	575	8.6	981	-2.67587			659	-7.83605
		558	7.4	2690	1.24165	2690	1.24165					1657	4.2			1090.5	1.17366	628.8	-4.59923	992	-0.4									1873.13	-1.15941	612	6.4	575	9	969	-2.17971			691	7.89446
		559	-0.6	2688	2.7	2688	2.7					1657	6.9			1090.7	5.95382	630.1	-1.59027	1006	-0.2									600.623	2.99099	614	6.9	575	8.3	1710	0.840974			489	-1.55
		559	4.4	2686	-4.2	2686	-4.2					1675	4.4			1090.8	7.18718	637.7	-4.23444	1009	0.2									2612.71	-0.109396	624	2.5	575	8.6	1738	1.93439			1151	9.25252
		561	8.2	2680	-4.5	2680	-4.5					1675	3.3			1091.2	3.6148	641.4	-3.3238	1013	4.6									505.345	-6.64187	619	6.8	575	7.4	953	-2.67874			1318	5.23393
		562	-1.1	2673	-14.4	2673	-14.4					1675	0.3			1092.4	7.51953	643.6	0.454289	1017	-0.6									2655.64	1.21198	617	5.3	575	7.7	979	-3.24782			1355	6.10577
		564	8.3	2672	-15.4	2672	-15.4					1675	5.2			1094.5	13.9238	710.6	7.14653	1018	-0.2									1092.18	-3.86549	621	4.3	575	10.1	952	-0.73126			969	-0.797176
		564	-0.2	2669	3.1	2669	3.1					1675	3.8			1094.8	6.11748	757.7	-1.47889	1021	2.4									1889.18	5.03601	566	2.4	575	8	1743	-2.74303			1653	4.37074
		564	5.8	2667	-14.7	2667	-14.7					1675	1.8			1096.2	4.95781			1023	1.1									1503.14	2.63789	620	2.5	575	8.7	1386	0.889197			2752	4.24386
		565	6.3	2665	4	2665	4					1675	1.6			1096.7	3.25603			1023	0.8									2023.44	-6.70706	625	2.7	616	5.6	1155	3.1637			455	-1.47689
		565	6.6	2665	0	2665	0					1675	3.9			1097	9.13033			1025	1.2									534.148	-11.2448	614	4.8	616	7.6	1155	5.40615			971	1.69255
		566	-0.2	2665	-1.8	2665	-1.8					1675	3.2			1112.4	3.20386			1025	1.9									1014.98	-3.53106	614	3.7	616	6.9	1084	-0.530048			2657	-6.1314
		568	9.4	2663	-10.2	2663	-10.2					1675	4.9			1112.9	11.2581			1031	3.4									1519.49	0.0793277	600	3.8	616	5.8	1617	2.06458
		568	8	2663	-8.7	2663	-8.7					1675	1.8			1113.5	6.67431			1031	0.3									523.934	-7.9387	615	6.5	616	5.4	1034	-0.0532157
		570	0.5	2663	-2.9	2663	-2.9					1675	2.8			1130.4	5.72072			1034	0.8									552.555	-5.79922	610	6.8	616	5.1	1820	-0.461352
		571	-1.9	2662	-0.2	2662	-0.2					1675	5.5			1143.1	5.11749			1034	3.4									643.413	4.50834	615	8.1	616	6.1	1221	-22.5269
		572	0.4	2662	-8.5	2662	-8.5					1675	2.6			1147.6	3.99598			1037	1									642.162	-8.78017	628	5.6	616	6.5	1150	0.781441
		573	-2.35369	2661	-5.2	2661	-5.2					1675	3.2			1153.9	5.43045			1040	-0.3									598.548	-9.52288	637	4.5	616	6.2	1229	0.441295
		574	9.4	2661	-5.5	2661	-5.5					1675	9.7			1155	5.58981			1042	2.3									2105.88	3.59031	635	6.5	616	6.3	1677	3.25637
		579	-9.1	2661	-5	2661	-5					1675	3			1155.3	6.47247			1045	2.2									1166.12	-5.29952	628	6	616	4.2	1129	1.49214
		580	-1.1	2660	-1	2660	-1					1675	2			1155.5	3.37304			1049	-0.2									633.338	-5.00951	618	7.9	616	5.7	1677	-6.89465
		581	-13.271	2659	1.6	2659	1.6					1675	5.9			1156.3	10.1753			1051	2.5									2618.74	-1.32651	615	5.5	616	7	1109	-0.434932
		586	3.57124	2658	-1.6	2658	-1.6					1675	0.7			1156.6	2.2627			1058	0.5									766.75	6.36839	630	6.5	616	8.1	1386	3.0045
		589	1.24594	2658	-1.56819	2658	-1.56819					1675	5.6			1159.5	5.25426			1062	1.5									1820.32	-1.95784	604	6.3	616	4.9	1702	-9.17348
		590	-31.5727	2655	-6.2	2655	-6.2					1675	4.9			1159.8	6.33267			1063	-2.3									495.251	1.34586	647	8.2	616	6	1577	7.73797
		590	6.9	2653	-13	2653	-13					1680	1.2			1160.6	9.77524			1077	1.1									2059.75	4.63902	610	7.7	616	6.9	1607	0.948128
		594	-10.1384	2653	-3.4	2653	-3.4					1680	6.4			1161.3	7.10113			1079	0.2									1137.11	2.57255	642	3.9	616	6	2715	0.457968
		594	7.6	2650	-4.3	2650	-4.3					1680	1.8			1167.2	2.09284			1082	0.1									541.72	-10.7439	621	6.7	616	6.4	1339	4.9844
		597	3.47942	2650	-2.06849	2650	-2.06849					1680	3.7			1167.9	5.72141			1099	1.7									976.393	-5.10846	640	5	616	3.5	1189	8.62387
		600	-10.7927	2648	-3.2	2648	-3.2					1680	3.6			1168	3.87595			1104	1.1									601.704	-13.4714	633	7.2	616	6.6	1272	8.87876
		601	-9.1	2647	-11.1	2647	-11.1					1680	0.5			1168.1	5.89917			1112	-1.3									556.617	-14.5139	619	7.5	616	5.5	1091	0.335167
		604	-10.053	2647	6.2	2647	6.2					1680	0.3			1169.4	6.55909			1126	2.6									2468.51	4.87321	633	7.2	616	8.3	1014	4.30032
		612	10.6	2645	-6.4	2645	-6.4					1680	0.9			1169.6	2.50201			1152	0.8									1746.02	2.32309	628	5.8	616	3	1504	4.4089
		626	3.58058	2642	-2.7608	2642	-2.7608					1680	0.5			1169.8	6.33566			1152	2.5									2619.38	0.0536333	609	7.2	616	5.3	1335	4.53621
		627	-1	2641	-4.7	2641	-4.7					1680	0.2			1170.4	9.72661			1177	3.2									555.205	-10.5416	611	6.1	616	4.3	1028	3.83029
		630	-4.10162	2640	9.4	2640	9.4					1680	0			1173.4	14.332			1195	0.8									1954.94	-7.36349	584	5.1	616	6.8	1148	7.39178
		638	-5.3	2638	-4.6	2638	-4.6					1680	1.4			1173.9	7.77247			1217	5.1									1154.52	-1.49118	609	3.7	616	5.6	1097	7.35797
		639	3.05144	2638	-0.3	2638	-0.3					1680	3.5			1175.6	1.45434			1253	0.8									595.477	-5.83459	618	7.6	616	5.2	1424	7.01586
		640	-9.84792	2638	-18.74	2638	-18.74					1680	3.9			1178.2	7.53876			1303	3.7									774.408	2.62742	591	3.5	616	5.3	1448	6.90389
		650	-7.38689	2636	-6.26813	2636	-6.26813					1680	1.9			1181.4	6.42892			1416	-3.3									1534.03	4.72668	719	10.4	616	6.8	1851	-5.84856
		650	-7.71737	2635	-2.4	2635	-2.4					1680	1.2			1181.4	2.52096			1622	2									1845.46	0.46637	614	4	616	5.5	1115	7.42356
		666	-0.2	2629	2.6	2629	2.6					1680	1.7			1182.3	3.59054			1738	4.7									573.549	-8.25821	629	6.1	616	4.6	1346	5.9945
		667	11.3495	2625	-6.1	2625	-6.1					1680	0.2			1188.8	7.61293			2103	2.1									506.789	6.46333	613	6.3			1344	3.12893
		672	1.39006	2617	-3.4	2617	-3.4					1680	0.1			1191.2	2.95452													1837.24	-3.76475	628	8.6			1059	-4.13178
		732	-1.9	2615	-9.2	2615	-9.2					1680	2.5			1191.3	5.07894													610.387	-3.45612	610	5.9
		736	-4.73311	2614	-4.3	2614	-4.3					1680	0.7			1193.2	4.78159													626.508	-11.1643	621	4.4
		746	7.51906	2610	1	2610	1					1680	1.2			1193.9	4.53307													488.145	-6.10957	618	6.8
		748	-3.4	2607	-8.1	2607	-8.1					1680	1.3			1195.6	7.78265													1520.1	3.35372	589	2.1
		753	11.1281	2603	-0.9	2603	-0.9					1680	1.9			1199.3	7.99301													2005.95	8.50001	602	4
		810	-3.2	2595	-11.4229	2595	-11.4229					1680	2.2			1202.7	11.3678													517.993	-8.01704	617	4.8
		832	-8.31583	2594	-1.7	2594	-1.7					1680	2.5			1207.4	6.67807													1505.46	2.84026	610	6.8
		835	-4.8	2594	-1	2594	-1					1680	2.6			1212.1	2.6413													927.834	-7.29283	628	6.6
		835	-2.1	2593	-5.8	2593	-5.8					1680	4.2			1212.2	-3.93386													636.118	3.4783	598	5.8
		836	-2.6	2592	-5.4	2592	-5.4					1680	3.3			1212.2	7.83783													600.543	-2.34305	603	6.1
		850	-3.4	2591	-4.84753	2591	-4.84753					1680	4.8			1212.4	2.31332													584.971	-3.51987	608	4.4
		854	-3.7	2590	-4.5	2590	-4.5					1680	0.1			1212.6	5.83606													465.701	-1.68656	615	0
		858	-3.5	2588	-0.6	2588	-0.6					1680	4.3			1220.9	5.70447													962.681	0.17801	586	2.8
		873	-11.1009	2584	-3.5	2584	-3.5					1680	1.2			1238.4	6.68317													1506.65	3.58726	715	-1.4
		888	-3.2	2577	-2.6	2577	-2.6					1680	2.6			1240.6	1.39878													550.846	-1.62525	1217	-2.6
		894	-1	2576	-10.9	2576	-10.9					1680	2.9			1241.8	8.85804													1147.32	0.995884	2220	-3.5
		898	-0.9	2575	-1.7	2575	-1.7					1680	0.2			1248.9	7.71275													1883.95	3.32334	561	-1.3
		898	-0.0240962	2575	-0.925378	2575	-0.925378					1680	3.8			1254.7	4.85123													2005.79	-3.93011	628	-0.7
		901	1.36007	2570	-4.4	2570	-4.4					1680	2.4			1276.8	11.8526													521.155	-1.68976	779	-33.6
		903	-0.1	2569	-1	2569	-1					1680	3.1			1329.4	4.2384													1917.49	0.306352	509	3.3
		903	-2	2565	-5.63676	2565	-5.63676					1680	0.6			1333.1	3.95418													1039.79	-10.4122	674	-0.1
		904	0.700596	2562	-3.5	2562	-3.5					1680	0.7			1336.2	12.3473													818.175	-5.76849	1458	-2
		905	1.1838	2561	-9.52471	2561	-9.52471					1680	3.5			1343.4	7.49118													669.801	-7.69358	622	-1.9
		906	-2.55418	2551	-0.3	2551	-0.3					1680	3.9			1345.3	4.45923													1385.25	-2.13568	644	-22.3
		909	1.6	2550	-13.5	2550	-13.5					1680	2.7			1350.2	11.3799													538.545	-12.4018	655	-2.4
		913	-8.27928	2547	-10.4	2547	-10.4					1680	1.4			1371.2	7.87418													1871.92	-2.88649	618	2.4
		914	-1.05981	2547	-2.44978	2547	-2.44978					1680	3.6			1379.7	6.55954													1127.88	-3.91637	595	5.9
		915	-2.1	2546	-8.3	2546	-8.3					1680	3.4			1392.6	7.76151													542.015	-7.87484	1036	1.3
		915	1.65966	2544	-4.4	2544	-4.4					1680	3.8			1444.6	10.9558													1287.23	0.962996	1928	-0.9
		915	-11.4985	2543	-7.8	2543	-7.8					1680	3.6			1444.7	0.186438													623.976	-1.69449	594	-26
		917	1.6	2542	-5.7	2542	-5.7					1680	7.4			1453.4	6.69037													581.073	-10.2044	565	-18.8
		918	0.6	2540	-3.4	2540	-3.4					1680	0.2			1453.7	-1.70731													1011.05	-8.13981	1929	-1.9
		918	-0.7	2538	-5.2	2538	-5.2					1680	0.3			1457.3	9.14862													1787.1	-4.56744	2235	3.8
		918	0.4	2537	-8.4	2537	-8.4					1680	4.4			1462.4	6.85622															2655	-1.7
		918	0	2537	-5.9	2537	-5.9					1680	0.8			1467.2	7.93956															832	9
		918	0.8	2531	-6	2531	-6					1680	5.6			1472.6	-0.496939															613	-5.3
		918	5.5	2529	-15	2529	-15					1680	4.9			1488.1	7.73626															625	2.4
		918	-1.2	2528	-2.5	2528	-2.5					1680	1.5			1493.3	5.76425															628	5.7
		918	0.9	2528	-9.4	2528	-9.4					1680	3.6			1498.1	4.16195															583	-0.1
		918	0.881051	2526	-2.3	2526	-2.3					1680	0.2			1503.1	7.31931															554	-2.7
		918	3.86485	2526	-10.1821	2526	-10.1821					1680	2.7			1503.5	9.5828															587	-4.6
		920	3.05832	2523	-2.4	2523	-2.4					1680	1.7			1588.4	6.90085															560	-0.7
		922	0.180757	2523	0.1	2523	0.1					1680	7.3			1637.5	5.8379															666	3.7
		922	1.88047	2520	-6.7	2520	-6.7					1680	2.1			1639	6.45617															567	-1.1
		923	-0.5	2518	-11.5	2518	-11.5					1680	0.3			1647.6	2.63389															620	-5.1
		923	2.5	2516	-5.1	2516	-5.1					1680	1.6			1649.1	4.26631															1272	4.1
		924	0.3	2512	-8.5	2512	-8.5					1680	2.5			1659.8	1.50631															639	11.7
		924	1.01004	2511	-4.5	2511	-4.5					1680	3.6			1673.7	7.94127															626	-1.3
		925	0.4	2509	-5.1	2509	-5.1					1687	1.7			1699.7	5.32762															1099	10.6
		926	-10.5102	2503	-3.7	2503	-3.7					1687	1.2			1738.3	7.45839															1651	3.8
		926	2.65135	2502	-2.8	2502	-2.8					1687	4.3			1745.9	2.71233															607	7
		926	1.9513	2498	-1.6	2498	-1.6					1687	3.9			1756.6	5.84136															639	10.1
		927	0.35074	2496	-7.4	2496	-7.4					1687	1.1			1761.2	11.8395															585	10.2
		928	-5.56634	2494	-3.6	2494	-3.6					1687	1.8			1770.1	1.16472															588	9.4
		928	3.11505	2486	-4.4	2486	-4.4					1687	0			1784.7	1.99323															616	10.7
		928	0.166003	2482	-4.3	2482	-4.3					1687	5.8			1806	6.0207															639	8
		929	-1.3	2481	-9.46234	2481	-9.46234					1687	3.5			1895.2	7.53885															634	6.6
		929	0.7	2479	-3.27582	2479	-3.27582					1687	4.5			2566.8	6.02524															565	7.3
		929	-1	2479	1.59199	2479	1.59199					1687	2.9			2702.4	-0.152403															1239	4.1
		929	-1	2478	-6.8	2478	-6.8					1687	3.7			2708.1	-0.0522295															601	9.8
		929	-1.5	2477	-19.1	2477	-19.1					1687	4			2718.4	-6.48146															623	11
		929	0.9	2471	-10.8	2471	-10.8					1687	4.5			2720.8	5.47226															593	0.5
		929	-0.5	2468	-4.2	2468	-4.2					1687	3.9			2723.5	4.75576															633	7.5
		929	0.3	2467	-7.9	2467	-7.9					1687	5			2724.2	-3.55994															602	8.5
		929	-1.9	2466	6.8	2466	6.8					1703	0.6			3007.2	1.70811															636	10.6
		929	-1.1	2456	-10.9	2456	-10.9					1703	4.8			298	-2.2															616	4.7
		929	-0.1	2453	-3.5	2453	-3.5					1705	9.3			311	-2.7															600	10.9
		929	-1.1	2448	-8.2	2448	-8.2					1705	4.6			318	1.2															612	4.7
		929	0.6	2448	-3.1304	2448	-3.1304					1705	4.5			324	-4.2															575	8.9
		929	1.7	2443	-9	2443	-9					1705	1.7			349	-2.3															626	2.5
		929	-0.2	2432	-5.6	2432	-5.6					1705	9			351	2.3															589	7.7
		929	-0.4	2427	-8.7	2427	-8.7					1705	5.8			354	1															577	8.6
		929	0.2	2412	-5	2412	-5					1705	6.4			355	-0.9															575	12
		929	0	2409	-10.5	2409	-10.5					1705	0.7			358	-6.7															655	-0.7
		929	-4.2	2409	-9.8	2409	-9.8					1705	7.9			360	-1.4															575	8.8
		929	0.49558	2404	-4.04828	2404	-4.04828					1705	1.8			368	-13.2															1241	20.8
		930	0.9	2399	-9.4	2399	-9.4					1705	6.6			369	-0.5															600	10
		930	-16.3	2395	-14.1	2395	-14.1					1705	7.9			371	-6.2															584	10.8
		930	-14.2	2392	-6.07026	2392	-6.07026					1719	2.1			375	-2.6															605	9.5
		930	0.5	2389	-0.691639	2389	-0.691639					1731	0.8			382	-10.2															587	10.1
		930	0.4	2377	-3.6	2377	-3.6					1731	2			388	-4.6															605	1.5
		930	-0.2	2338	-5.9161	2338	-5.9161					1732	0.9			389	4.2															592	8.7
		930	-0.9	2334	5.3	2334	5.3					1732	0.9			404	1.3															607	11.9
		930	2.74622	2330	-12.3	2330	-12.3					1732	3.2			407	4.9															635	4.7
		930	0.201205	2323	-12.2584	2323	-12.2584					1732	4.6			409	0.5															615	6.5
		933	0.924328	2310	3.9	2310	3.9					1732	2.3			409	-4.2															610	6.8
		934	-4.30958	2310	-0.3	2310	-0.3					1732	4.5			412	-0.8															615	8.1
		935	2.63644	2274	-0.3	2274	-0.3					1732	0.2			413	-5.4															628	5.6
		935	1.67129	2270	-2	2270	-2					1732	4.6			414	2.1															637	4.5
		936	4.67223	2213	-0.4	2213	-0.4					1732	3.2			414	-10.2															635	6.5
		937	-0.4	2202	-6.9	2202	-6.9					1732	1.5			416	-1.8															628	6
		937	-0.0467436	2172	1.46706	2172	1.46706					1732	10.9			418	2.7															618	7.9
		938	-7.32672	2148	-7	2148	-7					1732	6			420	-4.1															615	5.5
		940	3.7	2140	-8.4	2140	-8.4					1732	6.7			424	1.4															1476	2.1
		940	-8.9	2130	-8.16163	2130	-8.16163					1733	4.9			425	-9.2															647	2.3
		940	-1.2	2125	-11.2926	2125	-11.2926					1733	3.3			429	-1															630	6.5
		940	-8.4	2121	-6.1	2121	-6.1					1733	3.7			430	-2.1															604	6.3
		940	1.9	2119	-28.7964	2119	-28.7964					1733	3.2			432	-4.1															647	8.2
		940	-0.612211	2114	-17.5487	2114	-17.5487					1733	7.9			432	-6.6															610	7.7
		940	0.743428	2109	-13.4	2109	-13.4					1733	2.1			433	2.1															642	3.9
		941	0	2105	-20	2105	-20					1733	1.4			435	0.8															621	6.7
		943	-1.1	2094	0.2	2094	0.2					1733	3.3			435	1.1															640	5
		943	-3.657	2088	2.5	2088	2.5					1733	2.4			436	-4.2															633	7.2
		943	-0.756674	2070	-0.5	2070	-0.5					1733	0.8			436	-8.7															619	7.5
		943	1.3107	2066	7.8	2066	7.8					1733	1.7			436	-7.2															613	6.3
		944	-1	2064	-14.9	2064	-14.9					1737	3.4			441	-9.8															635	6.9
		945	0.904252	2062	4.73966	2062	4.73966					1739	4.1			443	-14.8															633	7.2
		946	3.12049	2060	-7.83954	2060	-7.83954					1739	2.9			447	5.6															628	5.8
		947	1.31615	2056	-19.3659	2056	-19.3659					1740	0			447	-4.7															609	7.2
		948	0.521112	2048	3.8	2048	3.8					1740	0.7			448	-2.4															611	6.1
		950	1.37348	2046	2.41324	2046	2.41324					1740	6.2			448	-5.2															584	5.1
		950	1.84546	2040	-14.1	2040	-14.1					1741	1.6			448	-5.4															609	3.7
		951	-0.678875	2039	-1.3	2039	-1.3					1741	0.7			451	0.2															618	7.6
		952	3.08018	2036	-3.98746	2036	-3.98746					1741	4.7			452	-2															591	3.5
		952	1.85796	2029	-15.8	2029	-15.8					1741	6.1			452	-6															719	10.4
		953	2.69797	2027	-13.9	2027	-13.9					1741	0.8			453	-4.9															614	4
		953	1.2251	2026	5.8	2026	5.8					1741	0.8			456	-2															629	6.1
		954	-2.01183	2018	5.0247	2018	5.0247					1741	0.7			464	-0.2															613	6.3
		954	-0.22872	2015	-6.96299	2015	-6.96299					1741	2.6			470	-3.1															628	8.6
		954	1.32527	2015	6.11914	2015	6.11914					1741	0.9			506	-9.2															610	5.9
		954	-1.57659	2012	-4.2336	2012	-4.2336					1741	2.3			514	2.7															621	4.4
		955	-0.2	2012	-5.6813	2012	-5.6813					1741	6.5			543	5.9															618	6.8
		955	-3.40171	2010	-4.4	2010	-4.4					1741	6.5			562	5.2															589	2.1
		956	-4.9167	2009	-3.4	2009	-3.4					1741	4.4			906	-3.5															602	4
		956	1.02709	2008	0.562849	2008	0.562849					1741	7.4			980	2.4															617	4.8
		956	-5.95259	2007	2.5	2007	2.5					1741	1.3			992	-0.4															610	6.8
		957	0.8	2006	0.267167	2006	0.267167					1741	4.2			1006	-0.2															628	6.6
		957	-0.704462	2000	0.1	2000	0.1					1741	1.1			1009	0.2															598	5.8
		957	-2.58717	2000	3.52969	2000	3.52969					1741	0.4			1013	4.6															603	6.1
		958	-2.76461	1990	1	1990	1					1741	2.3			1017	-0.6															608	4.4
		958	1.76295	1989	2.2	1989	2.2					1741	1			1018	-0.2															547	-30
		958	1.36981	1987	4.5	1987	4.5					1741	3.4			1021	2.4															508	-4.4
		959	0.5	1985	10.1	1985	10.1					1741	4.1			1023	1.1															2042	0.1
		959	1.62354	1984	-6	1984	-6					1741	1.6			1023	0.8															1507	-2.7
		960	1	1983	-0.2	1983	-0.2					1741	1.6			1025	1.2															1243	-2.3
		960	1.1	1983	1.7	1983	1.7					1741	3.8			1025	1.9															768	-0.6
		960	2.4	1982	12.1	1982	12.1					1741	2.8			1031	3.4															2706	-1.3
		961	-1	1976	8	1976	8					1750	0.8			1031	0.3															1506	-2.7
		962	0.622059	1976	5.4	1976	5.4					1752	0.5			1034	0.8															1523	4.3
		962	2.21368	1975	-0.817894	1975	-0.817894					1756	2.4			1034	3.4															2133	5.4
		963	3.9107	1974	1.92222	1974	1.92222					1756	4.5			1037	1															619	1
		963	0.532447	1972	1.45689	1972	1.45689					1757	0.8			1040	-0.3															2073	5.1
		964	-8.00703	1971	2.4	1971	2.4					1757	2.8			1042	2.3															505	-7.2
		964	4.25228	1971	-3.94241	1971	-3.94241					1759	7.3			1045	2.2															2015	0
		965	-2.82122	1970	10	1970	10					1759	11.1			1049	-0.2															1747	-1.2
		965	0.303805	1970	2.42333	1970	2.42333					1759	9.4			1051	2.5															672	2.5
		966	0.308629	1969	-2.2	1969	-2.2					1759	7.5			1058	0.5															546	6.1
		966	1.5	1969	4.33551	1969	4.33551					1759	6.8			1062	1.5															512	-3.3
		967	-0.72666	1967	3	1967	3					1759	5.8			1063	-2.3															1213	6.4
		967	0.185015	1967	-5.30707	1967	-5.30707					1759	6.4			1077	1.1															2022	3.6
		967	4.84516	1964	1	1964	1					1759	6.2			1079	0.2															532	-43.6
		968	-2.34409	1964	-1.98946	1964	-1.98946					1759	7.6			1082	0.1															2075	8.7
		968	-3.80771	1964	-0.17307	1964	-0.17307					1759	6.1			1099	1.7															2078	4
		968	-3.15204	1961	2.4	1961	2.4					1760	36.3			1104	1.1															610	-1.1
		968	1.1	1955	5.7	1955	5.7					1760	1.5			1112	-1.3															2553	6.1
		969	3.41971	1954	-1	1954	-1					1760	0.5			1126	2.6															1475	8.1
		970	0.748791	1954	0.553372	1954	0.553372					1760	1.9			1152	0.8															2046	6.3
		972	-1.80554	1953	2.5	1953	2.5					1760	2.5			1152	2.5															1443	-10.7
		974	0.6	1952	-20.9098	1952	-20.9098					1760	1.3			1177	3.2															532	-14.2
		976	-4.15768	1950	-4.2	1950	-4.2					1760	3			1195	0.8															1953	5.3
		980	0.5	1948	0	1948	0					1760	1.9			1217	5.1															2680	6.4
		981	3.40633	1948	-2.12001	1948	-2.12001					1760	1.2			1253	0.8															1766	-19.1
		982	-0.3	1947	-10.7277	1947	-10.7277					1760	1.5			1303	3.7															554	4
		985	-3.74551	1946	2	1946	2					1760	1.8			1416	-3.3															1925	5.5
		985	-0.232058	1946	-1.223	1946	-1.223					1760	1.5			1622	2															606	2.9
		986	2.22896	1944	-6.9	1944	-6.9					1760	1.5			1738	4.7															1229	1
		987	-6.06077	1943	-6.1	1943	-6.1					1760	3			2103	2.1															824	-4.3
		987	0.700225	1940	1.84808	1940	1.84808					1760	1.1																			618	-22.9
		989	-3.89674	1939	-0.9	1939	-0.9					1760	0.1																			586	-3.5
		990	0.9	1936	-5.2	1936	-5.2					1760	1.5																			520	-3.3
		990	-2.9	1933	-10.6	1933	-10.6					1760	20.1																			2160	6.1
		990	0.6	1933	1.92549	1933	1.92549					1760	8.3																			553	-3.5
		990	2.11186	1928	0	1928	0					1760	0.6																			2048	-4.9
		990	-4.39576	1927	-9.9	1927	-9.9					1760	1.8																			641	2.1
		993	-1.73795	1926	-3.9	1926	-3.9					1760	5.9																			572	5.9
		994	2.22103	1926	-1.4	1926	-1.4					1760	1.7																			1522	-4.7
		995	-4.20486	1924	-6.4	1924	-6.4					1760	1.8																			1200	2.1
		995	-4.1	1923	-2.22548	1923	-2.22548					1760	1.2																			576	5.7
		996	-0.56947	1921	-8.3	1921	-8.3					1760	2.5																			1499	-4
		997	3.49947	1921	-3.3	1921	-3.3					1761	1.6																			2730	-1.2
		997	1.08386	1920	2.5	1920	2.5					1766	0.7																			642	-5
		998	0.933799	1919	-9.4	1919	-9.4					1766	1.6																			602	3
		998	6.59559	1918	2.3	1918	2.3					1766	16.1																			575	5.2
		998	-1.30942	1918	-7.7	1918	-7.7					1766	0																			635	3.1
		999	-1.11698	1917	4.2	1917	4.2					1766	0.6																			1874	1.6
		1000	2.58989	1917	1.6	1917	1.6					1766	2																			611	2.6
		1002	-2.4	1916	-8.1	1916	-8.1					1766	1.3																			647	3.2
		1003	-1.08625	1913	-8.9	1913	-8.9					1766	1.2																			1919	0.9
		1004	-2.82166	1913	-6.7	1913	-6.7					1766	1.8																			553	4.3
		1004	1.08189	1913	-2.01332	1913	-2.01332					1766	0.4																			1410	8
		1005	3.72419	1911	-5.5	1911	-5.5					1766	0.9																			1986	4
		1006	3.17607	1909	-4.3	1909	-4.3					1766	0.9																			616	2.7
		1007	0.625324	1909	-9.5	1909	-9.5					1766	6.5																			773	0.5
		1009	1.20945	1909	-3.5	1909	-3.5					1766	4.7																			584	5.3
		1010	1.02592	1908	-0.3	1908	-0.3					1766	6.7																			1189	4.7
		1010	0.6445	1908	-6.1	1908	-6.1					1766	0.3																			1840	4.8
		1011	6.99454	1908	1	1908	1					1766	3.2																			614	2.5
		1012	2.20517	1908	-1.47884	1908	-1.47884					1766	2.5																			1787	1.5
		1013	3.38316	1907	-0.591848	1907	-0.591848					1766	2.3																			558	-1.1
		1013	0.59682	1906	-3.7	1906	-3.7					1770	1.2																			1656	6.3
		1016	2.39924	1904	-2.5	1904	-2.5					1773	0.1																			552	4.8
		1016	1.53497	1904	-2.02522	1904	-2.02522					1777	0.2																			544	0.9
		1016	-0.32961	1903	-1.4	1903	-1.4					1777	3.3																			550	1.6
		1016	2.51069	1903	-3.8	1903	-3.8					1779	0.2																			1207	3.9
		1017	2.374	1902	3.6	1902	3.6					1783	3.5																			1725	6.5
		1017	-1.58079	1901	3.2	1901	3.2					1783	4.5																			1542	1.7
		1018	-2.90587	1901	0.3	1901	0.3					1783	2.1																			1743	3
		1019	0.673316	1901	10.2	1901	10.2					1783	4																			559	4.7
		1019	1.67628	1900	3.3	1900	3.3					1783	1.2																			1742	1.8
		1020	4.8949	1900	-2.63006	1900	-2.63006					1783	4.7																			1431	1.8
		1020	1.81872	1899	-4.8	1899	-4.8					1783	7.2																			2702	-9
		1021	3.15415	1899	-5	1899	-5					1783	0.8																			1910	-9.1
		1022	3.22602	1899	-1.13307	1899	-1.13307					1783	3																			565	-0.3
		1022	2.2	1897	4.06042	1897	4.06042					1783	6.3																			1218	1.2
		1023	6.47579	1897	-2.15571	1897	-2.15571					1783	1.9																			1762	-1
		1023	2.2201	1895	0.809185	1895	0.809185					1783	8.1																			1636	5.9
		1024	5.3	1894	-4.1	1894	-4.1					1783	0.4																			1052	4
		1024	4.9	1894	3.60801	1894	3.60801					1800	2.2																			673	-5.2
		1024	2.6675	1894	-11.2315	1894	-11.2315					1800	4.8																			672	-7.4
		1024	-0.135654	1893	-8.74151	1893	-8.74151					1800	7.3																			670	2.9
		1024	0.863368	1892	0.4	1892	0.4					1800	1.3																			671	3.3
		1024	1.0303	1892	-10.8	1892	-10.8					1800	4.5																			640	2.5
		1024	1.67471	1892	-11.9967	1892	-11.9967					1800	3.4																			688	-0.1
		1024	-4	1891	-7.64235	1891	-7.64235					1800	3.2																			688	-1.5
		1025	2.3	1890	1.9	1890	1.9					1800	0.8																			694	-1.1
		1025	2.1	1889	1.1	1889	1.1					1800	10.3																			1478	5.6
		1026	3.57126	1888	-12.1	1888	-12.1					1800	2.6																			1469	1.2
		1026	1.35747	1888	-6.3	1888	-6.3					1800	1																			544	1.1
		1026	2.06975	1888	-1.8	1888	-1.8					1800	2.3																			1177	2.6
		1026	1.3	1888	-2.5	1888	-2.5					1800	1.4																			1567	3
		1027	-0.43048	1887	2.9	1887	2.9					1800	5.5																			645	1.2
		1027	4.38192	1887	-6	1887	-6					1800	4.9																			769	-1
		1028	-0.650582	1887	-1.31421	1887	-1.31421					1800	1.7																			1485	8.5
		1028	4.02593	1885	0.8	1885	0.8					1800	0.6																			774	3.8
		1028	0.237906	1885	-4.2	1885	-4.2					1800	5.8																			652	-5.8
		1028	1.65548	1885	20.8	1885	20.8					1800	3.3																			675	-5.7
		1029	-5.24094	1885	-4.38528	1885	-4.38528					1800	1.4																			1626	8.5
		1029	0.670972	1884	-2.3	1884	-2.3					1800	9.4																			646	-6.9
		1030	0.889518	1884	2.7	1884	2.7					1800	0.5																			1383	5.9
		1030	1.09583	1884	5.8	1884	5.8					1800	1.3																			1071	0.7
		1030	1.91175	1884	-1.26162	1884	-1.26162					1800	3.2																			1593	4.6
		1030	0.866461	1883	-8.6	1883	-8.6					1800	2.3																			673	-2.1
		1031	2.80616	1883	-0.5	1883	-0.5					1800	8.6																			1385	1.4
		1031	1.77526	1883	2.66192	1883	2.66192					1800	1.3																			653	-6.7
		1031	0.810906	1882	-6.9	1882	-6.9					1800	0.2																			655	1.1
		1032	3.46226	1882	-2	1882	-2					1800	1.3																			629	0.4
		1032	2.4	1881	6.6	1881	6.6					1800	6																			1199	3.7
		1033	2.7	1880	-10.9	1880	-10.9					1800	4.1																			641	-5.3
		1033	-1.2	1880	-2.2085	1880	-2.2085					1800	1.5																			708	1.4
		1033	0.7	1878	-1.56776	1878	-1.56776					1800	9.9																			662	-2.8
		1033	2.1	1877	-4.80043	1877	-4.80043					1800	7.2																			673	-1.5
		1033	1.89182	1876	-10	1876	-10					1800	0.9																			1919	-10.3
		1033	-0.402508	1876	-16.2	1876	-16.2					1800	5.1																			632	4.3
		1033	3.66358	1876	-6.3	1876	-6.3					1800	6.7																			647	4.4
		1033	1.34428	1875	-12.6	1875	-12.6					1800	7.9																			650	5.8
		1033	4.12909	1875	-7.2	1875	-7.2					1800	1.5																			643	4.4
		1033	2.2	1874	-6.2	1874	-6.2					1800	2.8																			625	3.4
		1034	1.92879	1874	-10.1408	1874	-10.1408					1800	3.7																			627	4.9
		1034	1.76814	1873	-3.8	1873	-3.8					1800	0.5																			639	4.5
		1035	-3.182	1873	-3.41928	1873	-3.41928					1800	1.9																			643	4.2
		1035	3.80842	1872	4.7	1872	4.7					1800	0.6																			667	4.5
		1035	2.91682	1871	-11	1871	-11					1800	5.9																			648	5.5
		1035	3.98262	1871	8.2	1871	8.2					1800	3.8																			674	5.7
		1036	-1.67778	1870	-10.2	1870	-10.2					1800	0.6																			1332.9	1.34934
		1036	2.52419	1870	1.6	1870	1.6					1800	5.8																			1684.1	2.77351
		1037	1.0504	1870	-1.34916	1870	-1.34916					1800	0.1																			1505.4	-1.56841
		1037	2.51527	1869	8.1	1869	8.1					1800	5																			2592.7	0.284072
		1037	-0.560609	1869	3.43325	1869	3.43325					1800	8.2																			1240	2.87089
		1038	-2.18684	1869	-11.4149	1869	-11.4149					1800	1.3																			1235.9	1.72418
		1038	1.03784	1868	-2.8	1868	-2.8					1800	4.2																			1456.9	-0.956417
		1038	2.89665	1867	-15.8	1867	-15.8					1800	1.5																			1300	4.774
		1038	1.81067	1866	-27.6	1866	-27.6					1800	7.2																			1139.2	0.337291
		1038	1.04645	1866	1.7	1866	1.7					1800	0.1																			1232.1	0.922534
		1039	1.35131	1865	-6.07191	1865	-6.07191					1800	0.6																			1597.6	2.17064
		1039	2.74348	1864	8.3	1864	8.3					1800	0.2																			1252.5	-5.52181
		1039	2.21967	1863	1.7	1863	1.7					1800	0.4																			1520.8	0.453391
		1039	-0.627206	1861	4.2	1861	4.2					1800	0.5																			1793	-0.87694
		1039	3.61495	1861	1.8	1861	1.8					1800	5.6																			1630.3	2.2354
		1040	1.28014	1861	7.7	1861	7.7					1800	5.9																			1361.5	1.35888
		1040	1.84592	1859	-14.7	1859	-14.7					1800	3.8																			1843.7	-0.599446
		1040	2.25807	1859	-8.9	1859	-8.9					1810	4.1																			1329.1	3.17768
		1040	3.23375	1859	-1.1	1859	-1.1					1810	0.1																			969.2	0.459347
		1041	3.70217	1859	7.1	1859	7.1					1810	4																			1958.8	-0.237253
		1041	1.70087	1858	-8.2	1858	-8.2					1810	1.9																			1501.8	2.19298
		1041	1.98074	1857	-3.4	1857	-3.4					1820	0.6																			1138.1	-0.0535811
		1042	3.44097	1856	-8.1	1856	-8.1					1820	0.2																			1016	1.36126
		1042	2.8566	1855	-0.617537	1855	-0.617537					1830	9.4																			1867.1	1.83489
		1042	-1.5	1854	-1.3	1854	-1.3					1830	3.2																			979.8	0.882792
		1043	0.520247	1853	-1.5	1853	-1.5					1840	5.4																			1826.3	-2.49488
		1044	5.69014	1853	2.2	1853	2.2					1840	0.4																			1197.4	-0.889446
		1044	2.52688	1851	-13.4	1851	-13.4					1840	0.5																			1856.6	-8.28278
		1044	0.908226	1851	-7.9	1851	-7.9					1840	4.2																			1688.6	2.34781
		1044	3.60335	1850	-2.7	1850	-2.7					1840	0.6																			1225.3	3.22143
		1044	0.747915	1849	-3.9	1849	-3.9					1860	0.9																			1271	3.59459
		1045	5.5951	1849	-4.43923	1849	-4.43923					1860	1.4																			1834.8	-2.33905
		1045	3.72071	1848	2.6	1848	2.6					1870	1.9																			1479	3.30739
		1045	1.9	1848	-7.8	1848	-7.8					1870	6.6																			1157.4	1.39408
		1046	0.459449	1848	-9.0497	1848	-9.0497					1880	0.8																			1612.5	5.74446
		1046	3.02623	1847	-20.6	1847	-20.6					1880	19																			1925.7	-0.831924
		1046	-3.62398	1847	-6.58128	1847	-6.58128					1880	0.3																			1197.8	0.126097
		1046	2.43106	1847	1.64141	1847	1.64141					1880	0.4																			1418	-2.51695
		1046	4.8	1846	-4	1846	-4					1880	5.1																			994.8	-0.145622
		1047	4.28834	1844	-13.5	1844	-13.5					1880	0.7																			1158.9	3.52749
		1047	4.2799	1844	-6.21964	1844	-6.21964					1880	2.4																			1197.1	-3.19944
		1048	3.26082	1843	-5.8	1843	-5.8					1890	6.9																			1792.5	-3.07768
		1048	0.114232	1843	-12.2	1843	-12.2					1890	1.8																			1124.3	0.988083
		1049	2.27069	1843	0.2	1843	0.2					1890	1.8																			1231.8	-1.5786
		1051	2.68221	1842	-2.7	1842	-2.7					1900	8																			1472.7	0.36143
		1051	2	1842	-20	1842	-20					1900	8.1																			1006.8	1.55522
		1052	2.20837	1839	-9.3	1839	-9.3					1910	5.8																			1191.6	2.9818
		1053	1.60997	1839	-3	1839	-3					1910	0.4																			1232.5	1.22317
		1054	1.99218	1838	-8.5	1838	-8.5					1920	2.5																			1287.9	3.38228
		1055	-6.28729	1837	-15.4	1837	-15.4					1940	2.6																			1755.9	0.475702
		1055	0.445875	1836	-7.4	1836	-7.4					1960	1																			1003	3.409
		1055	3.28053	1836	-0.8	1836	-0.8					1960	6.6																			1029	6.604
		1055	-0.4	1836	-5.27497	1836	-5.27497					1960	5.9																			1070	-1.163
		1056	-0.00738988	1835	-6.2	1835	-6.2					1960	6.3																			1070	7.266
		1056	1.42713	1835	-2.4	1835	-2.4					1960	7.4																			1106	-0.313
		1056	-0.164436	1835	-8.6	1835	-8.6					1960	4.6																			1113	0.787
		1056	-2.03372	1834	-17	1834	-17					1960	7.4																			1177	3.544
		1056	-0.0877194	1834	-7.3	1834	-7.3					1960	3.1																			1221	-0.334
		1057	3.92296	1833	-12.7	1833	-12.7					1960	1.1																			1239	1.976
		1057	-0.41988	1833	-14.2372	1833	-14.2372					1960	3.4																			1240	-5.787
		1057	1.45443	1832	-4.1	1832	-4.1					1970	2.7																			1269	-5.752
		1058	0.753374	1832	-3.5	1832	-3.5					2020	3.8																			1283	0.017
		1059	4.30134	1831	-8.8	1831	-8.8					2070	0																			1330	5.777
		1059	2.18511	1831	-6.8	1831	-6.8					2170	0.3																			1405	-0.885
		1060	3.92276	1831	-9.22892	1831	-9.22892					2200	10.2																			1447	3.112
		1060	4.06359	1829	11.3	1829	11.3					2280	3.3																			1510	8.113
		1060	2.92934	1829	-1.00099	1829	-1.00099					2310	2.7																			1712	-3.865
		1062	2.46232	1828	-6.4	1828	-6.4					2310	0.2																			1776	-3.262
		1062	-3.5402	1828	-24.8	1828	-24.8					2350	0.7																			1886	-1.801
		1063	3.20832	1828	-9	1828	-9					2350	0.6																			1953	-1.435
		1064	2.96902	1828	-15.1	1828	-15.1					2380	6.9																			1953	-2.813
		1065	5	1827	-19.9	1827	-19.9					2390	7.8																			2024	-1.882
		1065	-0.872505	1827	-0.981658	1827	-0.981658					2440	4.4																			2130	3.353
		1065	2.72933	1826	-9.5	1826	-9.5					2480	1.2																			563	0.878522
		1066	-1.13543	1826	-0.3	1826	-0.3					2520	0.8																			593	12.1754
		1066	2.93216	1825	-9.3	1825	-9.3					2520	1.9																			620	4.35711
		1067	6.67258	1824	-20.1	1824	-20.1					2540	0																			638	9.36528
		1067	1.32981	1824	-9.5	1824	-9.5					2550	0																			644	13.4341
		1067	-0.0510453	1823	-7.6	1823	-7.6					2560	2.4																			656	13.2783
		1067	1.20223	1823	-1.93854	1823	-1.93854					2560	2.5																			656	13.2783
		1068	5.04029	1821	-15.1	1821	-15.1					2590	2.9																			686	10.8163
		1068	2.35524	1820	0.8	1820	0.8					2600	1.5																			702	-4.05375
		1068	3.12165	1820	-6.7	1820	-6.7					2620	3.3																			745	3.49484
		1069	0.865815	1820	-4.6	1820	-4.6					2640	3.1																			801	-1.71628
		1069	3.85416	1820	-5.165	1820	-5.165					3290	1																			1184	2.7615
		1069	1.4046	1819	-2.1	1819	-2.1					1737	8.46252																			1405	0.241015
		1069	1.76687	1818	-9.6	1818	-9.6					1726	9.03346																			1574	2.55457
		1070	1.93541	1818	-6.5	1818	-6.5					1757	8.86896																			1604	3.03944
		1070	5.29576	1814	-8.8	1814	-8.8					1733	5.24467																			1866	0.837135
		1071	1.91449	1814	1	1814	1					1820	10.3034																			1967	-1.04913
		1071	1.1834	1813	-9.6	1813	-9.6					1740	8.04857																			2104	-0.625701
		1074	-2.43481	1813	-7.5935	1813	-7.5935					1738	10.1462																			2677	-2.11739
		1075	-0.950969	1810	2.4	1810	2.4					1735	6.31598																			590	6.8652
		1075	3.88327	1810	-17.2	1810	-17.2					1742	5.05853																			606	5.44475
		1076	5.39309	1809	1.46095	1809	1.46095					1738	9.64161																			608	3.05953
		1078	3.93112	1807	-14	1807	-14					1724	10.2258																			636	4.57094
		1079	2.63424	1807	-11.2	1807	-11.2					2275	-3.49526																			647	2.95556
		1079	7.1708	1806	-1.3	1806	-1.3					1737	10.5777																			658	6.69163
		1081	2.23296	1805	-0.2	1805	-0.2					1721	2.57374																			671	3.76941
		1083	1.33283	1804	-2.6	1804	-2.6					1739	9.4037																			705	5.66023
		1084	-5.67235	1803	-10.4	1803	-10.4					1730	1.92504																			729.4	2.40503
		1084	2.7153	1803	-11.2	1803	-11.2					1728	8.7721																			753.9	-6.7189
		1085	1.83602	1801	-5	1801	-5					1724	5.92108																			765.1	-5.24919
		1085	3.67428	1800	-0.602834	1800	-0.602834					1731	5.36452																			779.7	-3.78695
		1085	3.94362	1799	1.9	1799	1.9					1801	10.1706																			782.1	5.55291
		1087	4.13057	1799	-15.2	1799	-15.2					1731	8.48604																			899	-2.69022
		1088	2.78272	1797	1.8	1797	1.8					1739	7.40925																			1039.4	-1.05632
		1089	6.79871	1796	-12.4	1796	-12.4					1849	0.494292																			1075.1	-4.99679
		1090	8.4	1795	-7.1	1795	-7.1					1859	-1.34873																			1190.9	1.00946
		1090	17.2	1794	-1.30996	1794	-1.30996					1740	8.88772																			1224.3	-1.44024
		1090	-1.60814	1793	-3.07497	1793	-3.07497					1730	7.1337																			1241.2	-6.45245
		1091	4.61165	1792	-10.1	1792	-10.1					2453	-1.06748																			1546.9	-2.91865
		1091	4.16299	1792	-0.6	1792	-0.6					1761	-0.850954																			1561.1	9.30697
		1092	1.36131	1791	-0.9	1791	-0.9					1760	-2.77215																			1595.4	8.57129
		1092	6.7783	1791	0.2	1791	0.2					1749	5.99819																			1638.5	4.12402
		1093	5.46924	1791	-1.35718	1791	-1.35718					1733	6.0562																			1731.2	1.74928
		1096	0.85683	1790	-9.7	1790	-9.7					2658	-2.78341																			2000	-0.410277
		1097	4.32903	1790	-7.9	1790	-7.9					1731	6.38121																			2670	-4.67367
		1098	5.51234	1789	2.5	1789	2.5					1768	7.20525																			2801	-1.20787
		1099	0.637068	1789	-0.401669	1789	-0.401669					1734	4.86905																			596	-14.5087
		1103	2.519	1788	0.4	1788	0.4					1730	7.17779																			619	-5.27098
		1105	-0.466579	1788	2.6	1788	2.6					1778	1.95184																			726	9.11203
		1106	3.1	1788	1.15316	1788	1.15316					1733	4.8775																			655	-31.7434
		1108	1.83789	1788	1.83895	1788	1.83895					1737	7.22956																			673	8.39784
		1109	4.71944	1788	-0.209634	1788	-0.209634					1744	5.55171																			713	-6.01092
		1109	4.39038	1786	-2.45653	1786	-2.45653					1748	6.61904																			649	7.06857
		1109	3.84542	1782	0.388363	1782	0.388363					1680	5.06173																			631	7.77458
		1110	-5.75829	1780	-21.8	1780	-21.8					1741	4.82803																			631	7.77458
		1110	3.69081	1778	-11.7	1778	-11.7					1738	6.35791																			704	10.3572
		1110	1.65456	1777	-2.3	1777	-2.3					1747	6.79776																			2830	-7.82422
		1111	3.87719	1777	-1.5434	1777	-1.5434					1731	3.90559																			591	-2.34997
		1112	2.37936	1775	-1.54202	1775	-1.54202					2454	0.0430033																			591	-2.34997
		1113	4.92982	1774	-9.8	1774	-9.8					1750	5.23628																			2061	-3.27876
		1114	3	1772	-26.6	1772	-26.6					1739	2.64385																			1680	-9.49396
		1114	2.8	1768	4.1	1768	4.1					2547	-1.92729																			2944	-1.69299
		1115	3.65903	1767	-1.94906	1767	-1.94906					2475	-1.47176																			795	-5.15481
		1115	0.449386	1765	-15.9	1765	-15.9					2936	-1.91651																			1701	30.6187
		1115	3.16948	1762	-9.4	1762	-9.4					2476	-1.58321																			753	8.45972
		1116	4.1149	1761	3	1761	3					1732	3.25986																			690	11.0646
		1118	1.42665	1761	-0.1	1761	-0.1					1749	2.61419																			1918	-2.0966
		1118	-3.65195	1760	1.4	1760	1.4					2469	-1.29243																			664	8.53715
		1119	-2.83537	1759	-12.8	1759	-12.8					2470	-1.57383																			609	7.78707
		1121	2.72668	1756	1.3	1756	1.3					2498	-1.65211																			2002	-9.56687
		1121	1.82748	1755	-1.2	1755	-1.2					2756	-6.09499																			512	-2.24736
		1121	6.13371	1755	3.8	1755	3.8					1734	1.9798																			526	-3.5623
		1122	2.7	1753	-12.1379	1753	-12.1379					1731	2.92867																			539	0.00732544
		1122	2.71326	1753	-11.1988	1753	-11.1988					2487	-0.303333																			552	-3.72264
		1123	1.27244	1749	2.7	1749	2.7					2397	-2.56202																			569	-4.95442
		1123	2.63653	1748	-8.1	1748	-8.1					1778	-2.78965																			573	8.70908
		1123	2.22017	1748	-1.4	1748	-1.4					2504	-0.811477																			584	-0.216832
		1127	4.15651	1747	-1.7	1747	-1.7					2468	-1.7193																			603	-12.2153
		1128	-0.846811	1744	-7.1	1744	-7.1					1758	3.72362																			603	-12.2153
		1128	0.37227	1743	-1	1743	-1					2417	0.212347																			606	2.06274
		1128	5.58036	1738	-8.1	1738	-8.1					1731	4.44103																			614	4.74668
		1129	3.88231	1735	0.8	1735	0.8					2473	-0.419088																			624	-0.610182
		1129	1.96898	1735	4.3	1735	4.3					1853	-11.2463																			627	-4.92447
		1130	6.3	1734	1.4	1734	1.4					2373	-2.94631																			641	2.97325
		1131	5.0018	1734	-0.5	1734	-0.5					2472	0.119751																			653	-3.84279
		1132	0.778697	1731	-5.5	1731	-5.5					1721	8.38564																			678	12.8518
		1132	2.44563	1730	-6.6	1730	-6.6					1723	7.26064																			690	7.04384
		1133	3.17422	1728	-30.6	1728	-30.6					1739	9.86873																			694	5.53598
		1135	8.69952	1727	-1.90173	1727	-1.90173					1720	8.70371																			776	-13.5616
		1136	2.30727	1727	-2.34685	1727	-2.34685					1741	8.87384																			802	-14.7376
		1136	3.27154	1726	-5.00169	1726	-5.00169					1722	9.62248																			1002	-1.12109
		1136	5.83205	1725	-24.3882	1725	-24.3882					1735	9.54269																			1406	3.38743
		1137	1.6	1724	0.6	1724	0.6					1724	8.42239																			2126	37.2644
		1137	3.6	1724	3.5	1724	3.5					1725	9.01989																			2709	-3.21847
		1138	2.80923	1723	-20.1	1723	-20.1					1721	8.48765																			3104	-8.31129
		1138	5.40023	1723	-1.8	1723	-1.8																									1170	0.884578
		1138	3.80549	1719	-7.4	1719	-7.4																									1998	3.22023
		1139	1.74263	1717	-10.8	1717	-10.8																									618	9.68669
		1140	-0.453751	1717	-0.9	1717	-0.9																									661	6.99907
		1143	6.66421	1714	1.18015	1714	1.18015																									631	7.28353
		1144	5.55571	1712	0.7	1712	0.7																									566	-3.06637
		1145	3.03233	1711	5.2	1711	5.2																									599	7.29229
		1147	2.28334	1710	-3.2	1710	-3.2																									2078	-6.43614
		1148	5.37	1710	2.8	1710	2.8																									551	-5.34403
		1148	3.17225	1710	-6.76237	1710	-6.76237																									2176	4.5201
		1149	0.53891	1703	10.4	1703	10.4																									686	3.67067
		1149	3.97922	1702	4.5	1702	4.5																									613	6.03896
		1150	2.6	1701	-5	1701	-5																									613	-12.5141
		1150	4.2	1701	-5.12768	1701	-5.12768																									1214	4.43865
		1150	3.1	1699	-0.3																											633	4.20643
		1150	1.9	1697	9.1																											627	8.60632
		1150	-0.7	1697	2.1																											605	6.13571
		1150	4.8	1697	-11.0213																											605	6.13571
		1150	0.7	1694	-9.8																											684	14.2752
		1150	8.48015	1685	0.9																											572	6.66509
		1151	4.1	1685	0.89356																											2637	52.3012
		1151	6.7	1683	0.6																											588	9.85993
		1151	2	1682	5.2																											785	-16.5383
		1151	6.5	1682	4.6																											1554	0.148634
		1151	8.4	1679	0.8																											712	7.6236
		1151	7.6	1678	-1.2																											673	12.4397
		1151	5.1	1678	4.9																											673	12.4397
		1151	2.1	1677	9.5																											1369	0.638954
		1151	7.9	1675	-2.5																											625	5.51688
		1151	5.2	1675	-1.9																											641	4.83397
		1151	5.6	1675	2.4																											629.3	-6.42109
		1151	7	1669	-1.5																											608.6	-34.9813
		1151	2.5	1669	3.2																											1367.4	2.23025
		1151	8.9	1667	-2.4																											683.5	0.915138
		1151	3.7	1663	1.4																											609.1	-3.56168
		1151	6.8	1663	8.5																											1560	-0.38074
		1151	4.48729	1663	-2.3																											480.2	1.38023
		1151	3.51034	1663	1.7																											611.1	-9.7792
		1151	8.43219	1661	3.2																											1537.8	2.4946
		1152	4.27043	1661	6.4																											2085.2	2.54329
		1153	3.3	1660	5.3																											588.6	-2.27944
		1153	4.9	1659	2																											558.1	-0.0588881
		1154	2.4	1658	2.7																											2249.6	-0.725028
		1155	1.6	1657	2.2																											1155.7	0.404571
		1155	3.2	1652	1.8																											595.4	1.44153
		1156	-1.65992	1651	0.5																											572.3	-17.8745
		1157	1.8	1649	4.5																											1794.2	-10.7843
		1157	3	1648	-7																											622	-3.99236
		1157	2.8	1648	1.8																											651.7	8.40661
		1157	3.6	1647	2.9																											599.8	2.78367
		1158	6.01775	1647	11.8																											686.7	5.6033
		1158	3.60353	1646	-1.1																											797.7	-2.99726
		1159	7.8564	1646	-0.1																											629.5	4.6509
		1159	9.8447	1646	2.9																											599.4	0.829553
		1159	8.31257	1641	4.8																											613.7	-5.4345
		1159	4.8	1641	1.28209																											616.6	-2.95232
		1160	3.4	1640	5.9																											605.4	-0.635315
		1160	2.5	1639	0.5																											643.6	-1.48538
		1162	3.6	1639	6.4																											642.7	2.32808
		1162	2.94682	1639	2.1																											626.5	3.07194
		1163	3.43805	1637	7.1																											633	4.01356
		1164	0.1	1637	4.4																											619.8	6.29645
		1164	2.8	1636	-2.9																											645	4.48428
		1164	5.2	1634	1																											644.4	2.21386
		1164	2.1	1634	1.1																											631.7	0.351438
		1164	3.7	1633	2.2																											635.7	2.68418
		1164	4.7	1632	2.3																											646.9	2.15989
		1164	3.3	1632	-2.4																											630.4	2.48475
		1164	-0.6	1628	3.1																											636.7	1.30675
		1164	3.6	1628	-6.4																											598.9	2.43116
		1164	2.6	1628	1.6																											611	0.742277
		1164	2.7	1628	2.8
		1164	3.7	1626	-1.7
		1164	2.06712	1626	-0.5
		1165	6	1626	3.1
		1166	2.45015	1625	-1.5
		1166	3.8	1625	-0.2
		1170	3.2	1623	-2
		1173	2.22672	1621	2.2
		1174	3.15715	1621	-1.8
		1174	2.37526	1620	2.8
		1174	5.6	1618	-3.9
		1176	5.1288	1617	-0.7
		1176	4.06399	1614	2.7
		1177	0.795229	1612	1
		1178	9.32806	1610	8.5
		1179	-6.44441	1609	-0.6
		1181	3.6	1608	-0.9
		1181	-2.36716	1608	2.9
		1181	4.59401	1607	1.2
		1182	3.46169	1607	-0.9
		1183	4.27813	1605	0.6
		1185	5.5	1603	-5.2
		1185	4.12021	1603	2.8
		1186	1.22663	1601	1.1
		1187	3.69773	1598	5.7
		1187	-3.01705	1596	0
		1190	5.17046	1595	2.5
		1190	3.7	1595	-3.6
		1190	5.4	1593	3.4
		1191	4.1	1592	0.8
		1192	-2.3	1591	-3.5
		1192	4.3494	1590	8.1
		1194	1.16212	1588	-1.7
		1194	2.77464	1588	4.7
		1194	2.55983	1588	2.6
		1195	5.36315	1585	9.6
		1195	6.6	1584	-2.6
		1196	-0.1	1584	9
		1199	0.553793	1583	-2.8
		1200	5.2	1580	0.9
		1200	7.2	1579	-2.4
		1201	1.57912	1577	2.8
		1202	1.74286	1577	-38.1646
		1202	-1.65604	1576	0
		1206	-5.1	1574	3.2
		1208	-2.44715	1572	2.4
		1210	1.1	1570	-3.2
		1210	3.1	1564	-1
		1210	4.8	1562	3.9
		1210	1.2	1561	1.4
		1210	2.2	1561	-1.8
		1210	3.4	1559	-4.6
		1210	2.3	1559	4.6
		1210	2.4	1556	-6.19902
		1210	0.4	1545	0
		1210	4.8	1544	17.5
		1210	1	1543	2.8
		1210	3.2	1537	-1.7
		1210	7.1	1529	-9.92496
		1210	7.5	1523	-2.2
		1210	5.5	1523	3.8
		1212	6.2838	1517	2.1
		1212	7.65833	1516	4
		1213	5.00136	1512	7.8
		1215	-1.69146	1511	-0.1
		1215	1.7736	1510	6.3
		1217	2.7	1509	-6.9
		1218	3.68362	1508	-2.1
		1223	5.13509	1505	1.9
		1224	5.2556	1501	4.4
		1224	-3	1498	7.2
		1226	-0.247022	1498	1.8
		1227	4.66802	1493	-4.8
		1227	4.4	1491	10.2
		1230	3.9	1487	-2.7
		1231	5.3	1486	1.2
		1234	6.6	1486	2.3
		1234	4.32146	1485	-0.1
		1240	4.61358	1483	2.2
		1240	7.2	1482	2.1
		1241	5.07628	1481	10.2
		1246	10.3	1480	2.9
		1247	7.7	1478	3.5
		1247	2.35272	1477	6.2
		1250	7.27684	1477	3.6
		1250	6.54267	1476	0.5
		1252	2.0475	1472	-3.3
		1254	3.48352	1472	-5.12982
		1255	1.42205	1468	0.8
		1256	7.2	1467	-1.5
		1256	7.6	1466	2.7
		1256	7.4	1465	0.8
		1256	5.4	1465	-9.4
		1256	5.3	1465	-3.4
		1256	5.7	1463	3.2
		1256	5.9	1463	-0.4
		1256	5.6	1463	5.4
		1257	9.1	1461	-2.7
		1257	8.8	1461	-2.4
		1257	0.552445	1458	2.9
		1258	5.9	1458	2
		1258	8.4	1456	9
		1258	8.6	1455	-3.3
		1258	8.7	1451	2.1
		1259	6.7	1446	3.6
		1259	5.38	1440	4.8
		1260	-1.35879	1439	3.1
		1260	-1.92021	1437	4.2
		1262	7.1506	1436	5.3
		1264	7	1435	1.7
		1264	5.63058	1434	18.2
		1265	4.8	1429	3.8
		1268	7.2943	1428	-1
		1269	3.9	1428	-0.4
		1269	3.87061	1427	-0.8
		1271	5	1426	7.4
		1271	2.57143	1424	3.2
		1271	-3.20748	1420	4.7
		1275	10.1	1416	5.9
		1279	6.2	1407	-0.3
		1280	6.94549	1405	-4.3
		1285	5.4	1405	-3.1
		1285	-0.84146	1404	1.1
		1290	3.8	1401	-2
		1290	1.14176	1400	-16.9122
		1294	4.37881	1392	8.3
		1294	-3.42306	1391	-0.5
		1300	8.4	1391	4.6
		1300	2.37525	1388	8.8
		1300	8.74089	1387	1
		1308	3.18741	1383	3.6
		1310	0.814359	1380	-2.3
		1318	1.49841	1379	2.2
		1319	0.776708	1377	4.8
		1321	2.33348	1374	-14.6
		1323	5.25723	1372	-6.5
		1324	4.56455	1370	8.4
		1325	4.32003	1369	4
		1327	2.9501	1369	7.1
		1327	6.49424	1367	8.2
		1328	4.96762	1365	7.4
		1331	8	1364	3.4
		1333	-0.361979	1364	-11.5831
		1334	1.26123	1361	4
		1335	5.11096	1361	-13.5925
		1336	6.38203	1359	8.7
		1337	7.6465	1354	6
		1339	8.83557	1351	7.6
		1346	3.6443	1346	-17.7194
		1347	1.31532	1344	-5.45791
		1349	3.28782	1343	-13.2449
		1350	-0.792765	1342	1.8
		1352	8.56363	1341	7.2
		1353	6.64871	1339	-9.34144
		1354	13.1228	1335	-2.40716
		1355	-0.544893	1335	-8.29295
		1356	4.7	1334	10.5
		1358	4.34443	1333	5.3
		1361	-2.86697	1333	-8.68298
		1365	3.25331	1331	-17.0902
		1366	6.31444	1330	4
		1367	2.1441	1329	7.4
		1368	-1.18932	1329	-2.1
		1368	3.6	1328	-17.3356
		1373	7.04738	1327	-7.85664
		1374	7	1326	6.3
		1375	1.65765	1325	1.1
		1375	2.49398	1325	-4.2
		1376	9.5	1325	-18.1777
		1379	7.85005	1325	-9.499
		1379	6.45939	1324	-9.3
		1379	4.6	1322	3.5
		1380	7.79405	1322	-10.0694
		1381	6.424	1322	-9.16607
		1383	6.24322	1321	5.3
		1383	4.8	1321	-1.6
		1384	6.7	1321	6.1
		1385	6.98424	1321	-9.47019
		1386	7.9	1320	5.1
		1387	6.78607	1320	-9.14165
		1387	4.80486	1320	-9.86771
		1389	7.34963	1319	9
		1389	2.13438	1319	-9.72468
		1391	3.08051	1319	-10.1971
		1393	6.52686	1319	-0.885535
		1401	1.92498	1319	-16.8312
		1406	1.40185	1319	-8.46996
		1421	2.57855	1318	1.5
		1424	1.25617	1317	1.6
		1427	6.11195	1317	-8.38032
		1429	3.72277	1316	-1.7
		1430	1.23035	1316	12.5
		1431	-4.36261	1316	-8.91804
		1432	5.14678	1316	-9.17473
		1439	-0.887241	1315	-6.95556
		1440	1.69865	1314	-5.2
		1440	0.499804	1314	-10.2414
		1443	9.27374	1314	-9.03121
		1444	1.63729	1314	-13.354
		1444	4.1	1314	-10.1324
		1446	-7.91285	1314	-31.4533
		1446	1.27574	1313	2.3
		1447	5.8	1313	-8.55422
		1448	2.84609	1313	-6.5707
		1449	6.4	1313	-12.5798
		1450	3.81569	1312	2.2
		1450	-6.58035	1312	-10.0683
		1452	2.92394	1312	-9.84959
		1453	7.82535	1312	-20.0222
		1454	1.52591	1311	-10.0043
		1454	2.91267	1311	-10.4892
		1454	-4.26036	1310	3
		1455	-0.667939	1310	-13.1404
		1455	-0.597199	1309	-14.5478
		1456	-5.08163	1309	-9.04311
		1456	1.86381	1309	-18.8417
		1457	-2.59578	1309	-9.69174
		1457	0.520069	1308	4
		1459	0.532952	1308	-18.7853
		1459	4.2	1308	-34.8715
		1460	3.36348	1307	3.3
		1461	1.90072	1306	-9.08117
		1461	-3.8	1306	-10.4747
		1462	0.499181	1306	-9.63904
		1463	2.66253	1305	-9.34909
		1464	-2.04796	1304	2.8
		1466	-1.43655	1303	-7.61215
		1467	3.24269	1302	-9.5
		1468	0.0989832	1302	-4
		1468	0.402795	1302	-10.1787
		1469	-3.87454	1300	6.1
		1469	2.43578	1300	-9.25593
		1470	4.09413	1299	-9.90907
		1470	6.15957	1298	-19.6854
		1471	2.91294	1297	-11.6506
		1475	1.78789	1295	0.3
		1475	2.90645	1294	-19.8955
		1475	0.381596	1294	-19.0419
		1476	-3.50381	1288	7.7
		1476	3.85509	1287	-10.1018
		1478	1.88483	1287	-19.9662
		1479	9.70821	1280	-16.181
		1480	7.5	1279	7.5
		1480	16	1274	-0.5
		1480	8.5	1273	0.1
		1480	0.462331	1273	3.9
		1483	-5.72431	1273	3.9
		1483	2.12047	1272	-0.3
		1483	3.97782	1271	2.5
		1484	-4.07733	1271	4.5
		1485	-4.15333	1269	-3
		1485	0.894089	1268	-10.2073
		1487	1.59875	1261	7.1
		1487	-1.62167	1260	-2.1
		1488	1.33582	1260	3.7
		1489	-3.14717	1259	1
		1489	1.77879	1255	-0.8
		1490	-0.740856	1247	2.8
		1491	-5.99697	1246	7.7
		1491	-0.333848	1243	-2.8
		1491	1.86287	1239	-17.324
		1491	0.902837	1237	5.7
		1491	-0.173817	1235	2.2
		1492	9.61387	1232	4.9
		1492	3.39394	1229	-8.7
		1493	3.39185	1226	6.6
		1493	1.74227	1225	4.4
		1493	1.70236	1224	-3.4
		1493	1.73994	1224	6.2
		1494	3.74166	1216	6.4
		1494	5.32265	1216	4.8
		1494	4.94281	1213	0.2
		1495	2.19896	1210	4.8
		1495	-0.690604	1206	10.2
		1495	0.193836	1205	1.6
		1497	3.01664	1200	8.8
		1497	1.79901	1199	4.8
		1497	-0.269921	1196	-1.5
		1498	3.26743	1195	1.9
		1500	8.3	1194	3.7
		1500	7.8	1188	3.5
		1500	3.2	1187	13.4
		1501	5.287	1187	-2.8
		1502	8.50859	1185	5
		1503	2.88767	1184	-1.3
		1503	4.11607	1184	0.8
		1503	-2.61976	1183	8.5
		1504	5.90878	1182	7.6
		1505	-1.17345	1181	4.7
		1505	1.36533	1180	5.7
		1505	-1.46925	1177	1
		1505	3.34039	1177	-2
		1505	8.35369	1176	2.3
		1507	7.73379	1174	0.8
		1507	7.77522	1171	2.8
		1510	13.6	1170	3.8
		1513	1.59572	1167	6.1
		1514	1.29717	1164	3
		1517	5.53919	1163	2.4
		1517	4.10743	1162	-0.3
		1519	3.01862	1162	5.4
		1520	10.0765	1161	-3.8
		1529	11.2305	1161	-3.4
		1530	9	1157	3.9
		1533	2.37246	1157	-2.2
		1534	7.76161	1155	5.2
		1534	5.71437	1153	8.8
		1535	4.16972	1152	-1
		1535	2.42141	1151	11
		1536	-3.33344	1148	2.1
		1538	7.33372	1148	1.9
		1540	7	1147	-10
		1540	10.4	1146	-0.8
		1540	6.8	1145	9.2
		1541	-1.09345	1141	2.2
		1543	5.70013	1141	10.1
		1543	6.85783	1141	1
		1545	3.90814	1140	1.2
		1546	1.37133	1140	3.8
		1550	1.55938	1139	2.5
		1551	2.59212	1138	1.1
		1554	4.83442	1136	4.1
		1556	-4.14009	1136	1.6
		1561	4.811	1136	4.6
		1568	0.0434359	1135	2
		1571	2.13605	1133	2.5
		1575	2.53409	1132	6.1
		1576	3.22844	1131	3.9
		1580	6.6	1130	-2.1
		1580	7.6	1126	2.3
		1580	7.05893	1124	11.6
		1583	6.47082	1122	-0.4
		1588	3.31429	1121	-2
		1588	-0.273413	1120	-4
		1589	6.84598	1119	6.1
		1590	12.6	1119	-2.1
		1590	12.4	1117	9.2
		1590	16.9	1117	5.9
		1592	3.0107	1117	-14.5
		1595	-0.724869	1117	-8.4
		1596	10.6621	1116	3.3
		1597	5.00696	1116	-2.9
		1597	7.40328	1115	6.7
		1599	-24.9541	1113	5.8
		1599	-6.7047	1111	11.8
		1600	9	1111	-0.1
		1600	9.3	1111	3.5
		1600	3.54326	1109	-0.6
		1600	2.72277	1107	3.2
		1600	3.02326	1103	-0.2
		1601	6.3717	1101	-3.6
		1601	0.453698	1100	3.6
		1602	2.85888	1096	6.2
		1603	4.1706	1095	-0.4
		1603	4.37236	1094	1.8
		1603	2.23322	1091	2.2
		1604	4.56102	1090	0.7
		1606	-4.10114	1088	7.1
		1606	4.14669	1088	-1.4
		1607	4.36444	1087	4
		1608	0.789994	1086	3.1
		1608	4.15908	1085	3.2
		1610	7.35855	1084	2.2
		1610	3.26991	1083	3.4
		1612	5.86459	1083	-1.6
		1612	4.53942	1083	4.3
		1612	-0.888116	1083	-0.1
		1612	-2.77447	1083	3.4
		1613	4.51096	1082	4.3
		1616	1.87812	1081	1.3
		1618	3.82888	1081	7.3
		1620	1.37643	1080	1.2
		1623	7.07745	1080	5
		1623	3.44591	1079	3.4
		1623	-0.289629	1079	-2.9
		1624	1.87149	1078	3
		1625	1.05647	1077	12.9
		1625	1.2984	1077	5.9
		1626	5.31088	1077	0
		1627	0.489558	1077	-10.3
		1627	-1.80157	1076	6.4
		1628	-2.6997	1075	-3.2
		1629	-0.410716	1074	-2.4
		1630	4.52339	1074	0.5
		1630	0.69473	1073	0.5
		1630	4.7421	1073	0.6
		1630	2.29406	1072	0.8
		1632	5.38394	1070	-1.7
		1632	7.28975	1070	1.8
		1633	5.26105	1070	3.4
		1635	2.07687	1070	-3.6
		1635	4.7535	1070	1.1
		1638	2.35195	1070	10.3
		1638	5.16869	1068	1.4
		1639	-0.376648	1067	6.3
		1639	4.66758	1064	4.8
		1641	1.59707	1062	-0.1
		1641	-1.88458	1062	-0.1
		1641	0.400893	1062	2.1
		1642	5.83583	1060	3.4
		1643	2.95619	1060	3.8
		1644	2.63568	1057	4.1
		1645	-7	1056	-0.8
		1646	3.21207	1056	-0.1
		1646	2.23916	1056	-2.4
		1647	-0.0860531	1055	2.8
		1647	4.65156	1055	4.6
		1648	6.55778	1055	-6.1
		1649	2.15299	1055	-1.1
		1650	2.56198	1054	-2.9
		1650	6.23791	1054	3.8
		1651	-2.00017	1054	5.4
		1653	4.46362	1053	2.8
		1653	4.4636	1052	2
		1653	5.61908	1051	2.3
		1653	2.78734	1050	3.9
		1653	1.91987	1050	1.9
		1654	3.87078	1048	7.4
		1654	0.359518	1048	5.1
		1654	-0.400835	1048	-4
		1654	2.71674	1047	0.8
		1655	-0.497192	1047	3.3
		1655	-3.7	1046	3.3
		1656	1.7025	1046	7.2
		1657	-2.36922	1044	6.5
		1657	2.95709	1044	-3.3
		1658	5.28717	1043	0.8
		1658	1.6	1043	-1.1
		1659	-0.574997	1041	3.4
		1660	0.590952	1041	-1.7
		1662	0.685332	1041	-6.6
		1663	6.97418	1040	-3.3
		1665	3.65124	1038	1.2
		1665	10.286	1038	-5.5
		1665	3.1	1037	-1.5
		1666	3.06887	1036	4.5
		1666	2.55553	1036	1.2
		1666	-0.563631	1036	4.2
		1668	1.65617	1035	1.2
		1668	3.46532	1035	7.8
		1670	5.2	1035	-2.5
		1670	-2.5	1034	3.4
		1670	-8.1	1034	4.6
		1672	2.70186	1034	3.9
		1673	2.52522	1033	-0.6
		1675	0.965606	1032	3
		1678	1.81591	1032	5.9
		1679	3.77293	1032	1
		1680	-0.250505	1031	-0.3
		1680	3.7	1030	1.1
		1681	2.6037	1028	9.9
		1686	4.41175	1028	1.5
		1689	1.27317	1027	3.6
		1694	2.92453	1027	3.9
		1694	0.753739	1026	-1.5
		1695	1.62488	1025	0.8
		1696	-0.00323867	1025	2.7
		1698	0.5	1025	2.3
		1699	-3.43297	1024	-0.6
		1716	4.29737	1023	6.8
		1717	1.73825	1022	3.4
		1718	2.13174	1022	2
		1719	3.86149	1021	-2.3
		1722	4.03416	1021	0.1
		1752	-1.93282	1021	7.4
		1752	-1.22374	1018	4.8
		1753	2.89599	1017	-1.9
		1754	2.21741	1016	-6.9
		1755	3.67888	1015	-1.6
		1756	2.6593	1014	1.2
		1760	2.58108	1014	-3
		1768	-3.34559	1011	5.3
		1769	-0.783	1008	1.6
		1777	-7.13952	1006	3.1
		1778	-1.19064	1006	2.4
		1781	0.824416	1005	8.8
		1783	-5.05665	1005	-3.1
		1785	-5.61449	1004	7.3
		1786	-0.693649	1002	6.4
		1787	0.963416	998	-1.6
		1791	-4.31944	991	1.7
		1792	-0.874636	990	-3.2
		1792	10.5048	989	0.5
		1794	-1.26728	989	-3.5
		1794	2.55185	989	-5.4
		1796	-11.3438	988	2.2
		1797	-1.28649	987	0.1
		1800	5.7	987	-8.3
		1800	9.5	986	1
		1800	-1.35326	981	-3.1
		1803	-6.90348	980	-0.8
		1803	0.735385	979	3.3
		1806	0.381949	977	1.5
		1816	-2.63243	976	-2.4
		1820	-14.805	974	-0.6
		1828	-14.9189	973	1.9
		1843	-2.34339	971	-1.7
		1847	-13.6141	969	-2.7
		1848	0.484785	966	-4.4
		1848	-14.0653	955	6.2
		1851	-10.9396	953	7.5
		1898	-0.451989	950	-3.1
		1907	-8.10878	950	-2.6
		1953	0.958675	949	-8.5
		1970	6.55642	944	-2.2
		2084	-6.63728	942	-5.8
		2091	1.21202	936	-3.9
		2404	0	932	4.8
		2414	-6.42725	931	-0.1
		2418	-4.1	931	-0.9
		2421	-3.8	929	4.7
		2432	-3.6	925	-10.2
		2486	-3.2	925	-0.5
		2531	2.60121	921	-4.8
		2667	0.355402	919	0.1
		2675	0.90009	917	3.2
		2677	-1.98158	914	-4.5
		2683	-0.11993	888	-5.5
		2692	2.4	856	-2.3
		2694	3.88279	854	1.8
		2696	-5.44079	850	-1
		2697	0.768343	763	-6.6
		2705	0.5	687	0.5
		2716	-3.62924	676	1.7
		2728	-2.05453	675	5.1
		2728	-10.2162	653	-1.8
		2738	2.97304	642	2.6
		2762	0.972463	568	-1.3
		2775	-1.6	566	-18.9
		2784	1.9	547	2.4
		2798	-0.5	506	-23.6
		2847	2.12533	491	-1.6
		2857	1	489	-7
				487	-5.4
				486	-9.2
				479	-6.4
				475	-34.3
				466	-5.7
				465	-0.6
				465	-3
				464	-3.5
				462	-5.5
				461	-10.8
				460	-6.8
				460	-6.7
				459	-0.5
				459	-7
				459	-6.9
				459	-7.2
				458	2.4
				458	-3.5
				458	-8.4
				458	-5.8
				458	-5.6
				457	-1
				457	8.3
				456	-5
				456	-6.4
				456	-6.6
				456	-5.9
				456	-6.8
				456	-6.8
				456	-5.9
				456	-6.6
				456	-5.9
				456	-6.2
				456	-6.2
				456	-5.8
				456	-6.1
				456	-5.6
				456	-6.1
				455	-9.2
				455	-6.2
				455	-5.7
				455	-6.3
				455	-6.2
				455	-6.1
				454	-3.9
				453	-9.3
				453	-6.1
				453	-6.3
				453	-6.2
				453	-7.4
				453	-7.6
				452	-1.6
				451	-5.7
				451	-5.4
				449	-2.4
				447	-10.1
				447	-8
				447	3.4
				446	6.1
				445	-8.8
				445	-5.8
				445	-4.2
				445	-5.1
				444	-3
				444	-10
				443	-6.1
				443	-2.3
				443	-8.6
				443	2.6
				442	-8.8
				442	-6.3
				442	-6.5
				441	4.7
				441	-9.3
				441	-10.3
				440	-3.5
				440	-14.2
				439	-9.1
				438	1.3
				438	-9.7
				438	-7.7
				437	-13.4
				437	-6.7
				436	-21.5
				436	-6.3
				435	-25.5
				435	-8.6
				435	-9.9
				435	-7.9
				434	1.9
				434	-8.7
				433	-0.1
				433	-7.1
				433	-9
				433	-11.3
				433	-5.2
				432	-8.8
				432	-9.3
				432	-7.9
				432	-8.9
				431	-12.1
				430	-7.5
				430	-5.9
				429	-7.8
				429	-16.1
				429	-6.4
				429	-8.3
				427	-8.4
				426	-9.2
				426	-10
				425	0.8
				424	-10
				424	-7.9
				424	-6.7
				424	-8.6
				424	-7.9
				424	-7.8
				424	-9.1
				423	-0.8
				422	-7.7
				422	-7.5
				422	-12.1
				422	-10.1
				422	-8.8
				422	-6.7
				421	-10.3
				420	-6.3
				420	-6.5
				419	-8.1
				418	5.3
				418	-10.2
				418	-28
				418	-10
				417	-8.7
				417	-9
				417	-8.8
				416	3.9
				416	-9.6
				415	-4.6
				412	-7.5
				411	-11.9
				409	6.3
				406	0.2
				405	-9.6
				404	-5.4
				402	-8.6
				402	-31.3
				402	-10.5
				389	-1.5
				389	-10.1
				387	-1.1
				386	-7.1
				375	-15.8
				362	0
				357	-7.9
				350	-26.6
				290	5.3
				244	0.6
				220	-16
[truncated: 8 more columns]
